# Supplementary material for: Molecular Signatures of Non-typeable Haemophilus influenzae Lung Adaptation in Pediatric Chronic Lung Disease
Source: Front Microbiol. 2019 Jul 16;10:1622. doi: 10.3389/fmicb.2019.01622 (PMC6646836; doi:10.3389/fmicb.2019.01622)
Supplement: Supplementary file 2 [file Table_1.xlsx]

## Sheet: Aziz et al., 2019
Updated Cluster of Orthologous Group terms for non-typeable Haemophilus influenzae strain 86-028NP
86-028NP Locus Tag	GI Number	Gene	Product	COG ID	COG_Description	COG_Category
NTHI0001	68248552	gapA	glyceraldehyde-3-phosphate dehydrogenase	COG0057	GapA, Glyceraldehyde-3-phosphate dehydrogenase/erythrose-4-phosphate dehydrogenase	Carbohydrate transport & metabolism
NTHI0002	68248553	faa1	putative long-chain-fatty-acid--CoA ligase	COG1022	FAA1, Long-chain acyl-CoA synthetases (AMP-forming)	Lipid metabolism
NTHI0003	68248554	cof	hypothetical protein	COG0561	Cof, Predicted hydrolases of the HAD superfamily	General function prediction only
NTHI0004	68248555	---	hypothetical protein	COG0319	COG0319, Predicted metal-dependent hydrolase	General function prediction only
NTHI0006	68248556	fdhD	formate dehydrogenase accessory protein	COG1526	FdhD, Uncharacterized protein required for formate dehydrogenase activity	Energy production & conversion
NTHI0007	68248557	fdxG	formate dehydrogenase major subunit	COG0243	BisC, Anaerobic dehydrogenases, typically selenocysteine-containing	Energy production & conversion
NTHI0010	68248558	fdxH	formate dehydrogenase, iron-sulfur subunit	COG0437	HybA, Fe-S-cluster-containing hydrogenase components 1	Energy production & conversion
NTHI0011	68248559	fdxI	formate dehydrogenase, cytochrome B556 subunit	COG2864	FdnI, Cytochrome b subunit of formate dehydrogenase	Energy production & conversion
NTHI0012	68248560	fdhE	formate dehydrogenase accessory protein FdhE	COG3058	FdhE, Uncharacterized protein involved in formate dehydrogenase formation	Posttranslational modification, protein turnover, chaperones
NTHI0013	68248561	rimI	ribosomal-protein-alanine N-acetyltransferase	COG0456	RimI, Acetyltransferases	General function prediction only
NTHI0015	68248562	holD	DNA polymerase III subunit psi	COG3050	HolD, DNA polymerase III, psi subunit	DNA replication, recombination, & repair
NTHI0016	68248563	rsmC	16S ribosomal RNA m2G1207 methyltransferase	COG2813	RsmC, 16S RNA G1207 methylase RsmC	Translation, ribosomal structure & biogenesis
NTHI0018	68248564	era	GTP-binding protein Era	COG1159	Era, GTPase	General function prediction only
NTHI0019	68248565	rnc	ribonuclease III	COG0571	Rnc, dsRNA-specific ribonuclease	Transcription
NTHI0020	68248566	lepB	Signal peptidase I	COG0681	LepB, Signal peptidase I	Intracellular trafficking & secretion
NTHI0021	68248567	lepA	GTP-binding protein LepA	COG0481	LepA, Membrane GTPase LepA	Cell envelope biogenesis
NTHI0022	68248568	---	autonomous glycyl radical cofactor GrcA	COG3445	COG3445, Acid-induced glycyl radical enzyme	General function prediction only
NTHI0025	68248569	ung	uracil-DNA glycosylase	COG0692	Ung, Uracil DNA glycosylase	DNA replication, recombination, & repair
NTHI0026	68248570	miaB	hypothetical protein	COG0621	MiaB, 2-methylthioadenine synthetase	Translation, ribosomal structure & biogenesis
NTHI0027	68248571	citT	hypothetical protein	COG0471	CitT, Di- and tricarboxylate transporters	Inorganic ion transport & metabolism
NTHI0028	68248572	citG	putative 2-(5''-triphosphoribosyl)-3'-dephosphocoenzyme-A synthase	COG1767	CitG, Triphosphoribosyl-dephospho-CoA synthetase	Coenzyme metabolism
NTHI0029	68248573	citF	citrate lyase alpha chain	COG3051	CitF, Citrate lyase, alpha subunit	Energy production & conversion
NTHI0030	68248574	citE	citrate lyase beta chain	COG2301	CitE, Citrate lyase beta subunit	Carbohydrate transport & metabolism
NTHI0031	68248575	citD	citrate lyase subunit gamma	COG3052	CitD, Citrate lyase, gamma subunit	Energy production & conversion
NTHI0032	68248576	citC	[citrate [pro-3S]-lyase] ligase	COG3053	CitC, Citrate lyase synthetase	Energy production & conversion
NTHI0033	68248577	lipA	lipoyl synthase	COG0320	LipA, Lipoate synthase	Coenzyme metabolism
NTHI0034	68248578	lipB	lipoyltransferase	COG0321	LipB, Lipoate-protein ligase B	Coenzyme metabolism
NTHI0035	68248579	---	hypothetical protein	COG2921	COG2921, Uncharacterized conserved protein	Function unknown
NTHI0036	68248580	dacA	penicillin-binding protein 5 precursor	COG1686	DacC, D-alanyl-D-alanine carboxypeptidase	Cell envelope biogenesis
NTHI0037	68248581	rlpA	RlpA-like protein	COG0797	RlpA, Lipoproteins	Cell envelope biogenesis
NTHI0038	68248582	mrdB	Rod shape-determining protein RodA	COG0772	FtsW, Bacterial cell division membrane protein	Cell division & chromosome partitioning
NTHI0039	68248583	mrdA	penicillin-binding protein 2	COG0768	FtsI, Cell division protein FtsI/penicillin-binding protein 2	Cell envelope biogenesis
NTHI0041	68248584	---	hypothetical protein	COG1576	COG1576, Uncharacterized conserved protein	Function unknown
NTHI0042	68248585	---	hypothetical protein	COG0799	COG0799, Uncharacterized homolog of plant Iojap protein	Function unknown
NTHI0043	68248586	---	hypothetical protein	COG2985	COG2985, Predicted permease	General function prediction only
NTHI0044	68248587	---	conserved hypothetical ABC transporter ATP-binding protein	COG4178	COG4178, ABC-type uncharacterized transport system, permease and ATPase components	General function prediction only
NTHI0045	68248588	mreB	rod shape-determining protein MreB	COG1077	MreB, Actin-like ATPase involved in cell morphogenesis	Cell division & chromosome partitioning
NTHI0046	68248589	mreC	rod shape-determining protein MreC	COG1792	MreC, Cell shape-determining protein	Cell envelope biogenesis
NTHI0047	68248590	mreD	rod shape-determining protein MreD	COG2891	MreD, Cell shape-determining protein	Cell envelope biogenesis
NTHI0048	68248591	---	hypothetical protein	None	None	Function unknown
NTHI0049	68248592	xthA	exonuclease III	COG0708	XthA, Exonuclease III	DNA replication, recombination, & repair
NTHI0050	68248593	rluA2	conserved hypothetical pseudouridine synthase	COG0564	RluA, Pseudouridylate synthases, 23S RNA-specific	Translation, ribosomal structure & biogenesis
NTHI0051	68248594	---	hypothetical protein	COG3768	COG3768, Predicted membrane protein	Function unknown
NTHI0052	68248595	---	conserved hypothetical FtsH-interacting integral membrane protein	COG0670	COG0670, Integral membrane protein, interacts with FtsH	General function prediction only
NTHI0053	68248596	---	hypothetical protein	COG3054	COG3054, Predicted transcriptional regulator	General function prediction only
NTHI0054	68248597	phnA	PhnA homolog	COG2824	PhnA, Uncharacterized Zn-ribbon-containing protein involved in phosphonate metabolism	Inorganic ion transport & metabolism
NTHI0055	68248598	eda	keto-hydroxyglutarate-aldolase/keto-deoxy-phosphogluconate aldolase	COG0800	Eda, 2-keto-3-deoxy-6-phosphogluconate aldolase	Carbohydrate transport & metabolism
NTHI0056	68248599	uxuC	glucuronate isomerase	COG1904	UxaC, Glucuronate isomerase	Carbohydrate transport & metabolism
NTHI0057	68248600	fabG	D-mannonate oxidoreductase	COG1028	FabG, Dehydrogenases with different specificities (related to short-chain alcohol dehydrogenases)	Secondary metabolite biosynthesis, transport, & catabolism
NTHI0060	68248601	dctQ	putative TRAP-type C4-dicarboxylate transport system, large permease component	COG1593	DctQ, TRAP-type C4-dicarboxylate transport system, large permease component	Carbohydrate transport & metabolism
NTHI0061	68248602	dctM	putative TRAP-type C4-dicarboxylate transport system, small permease component	COG3090	DctM, TRAP-type C4-dicarboxylate transport system, small permease component	Carbohydrate transport & metabolism
NTHI0062	68248603	dctP	putative TRAP-type C4-dicarboxylate transport system, periplasmic component	COG1638	DctP, TRAP-type C4-dicarboxylate transport system, periplasmic component	Carbohydrate transport & metabolism
NTHI0063	68248604	tdh	conserved hypothetical zinc-type alcohol dehydrogenase-like protein	COG1063	Tdh, Threonine dehydrogenase and related Zn-dependent dehydrogenases	Amino acid transport & metabolism
NTHI0064	68248605	uxuR	Uxu operon regulator	COG2186	FadR, Transcriptional regulators	Transcription
NTHI0065	68248606	uxuA	mannonate dehydratase	COG1312	UxuA, D-mannonate dehydratase	Carbohydrate transport & metabolism
NTHI0066	68248607	terC	putative membrane protein TerC	COG0861	Membrane protein TerC, possibly involved in tellurium resistance	Inorganic ion transport & metabolism
NTHI0067	68248608	uvrC	excinuclease ABC subunit C	COG0322	UvrC, Nuclease subunit of the excinuclease complex	DNA replication, recombination, & repair
NTHI0068	68248609	kdsB	3-deoxy-manno-octulosonate cytidylyltransferase	COG1212	KdsB, CMP-2-keto-3-deoxyoctulosonic acid synthetase	Cell envelope biogenesis
NTHI0069	68248610	lpxK	tetraacyldisaccharide 4'-kinase	COG1663	LpxK, Tetraacyldisaccharide-1-P 4'-kinase	Cell envelope biogenesis
NTHI0072	68248611	msbA	lipid transporter ATP-binding/permease protein	COG1132	MdlB, ABC-type multidrug transport system, ATPase and permease components	Defense mechanisms
NTHI0073	68248612	rec2	recombination protein 2	COG2333	ComEC, Predicted hydrolase (metallo-beta-lactamase superfamily)	General function prediction only
NTHI0074	68248613	dksA	DnaK suppressor protein	COG1734	DksA, DnaK suppressor protein	Signal transduction
NTHI0076	68248614	pcnB	probable poly polymerase	COG0617	PcnB, tRNA nucleotidyltransferase/poly(A) polymerase	Translation, ribosomal structure & biogenesis
NTHI0077	68248615	folK	2-amino-4-hydroxy-6-hydroxymethyldihydropteridine pyrophosphokinase	COG0801	FolK, 7,8-dihydro-6-hydroxymethylpterin-pyrophosphokinase	Coenzyme metabolism
NTHI0078	68248616	---	hypothetical protein	COG0802	COG0802, Predicted ATPase or kinase	General function prediction only
NTHI0079	68248617	amiB	probable N-acetylmuramoyl-L-alanine amidase AmiB precursor	COG0860	AmiC, N-acetylmuramoyl-L-alanine amidase	Cell envelope biogenesis
NTHI0080	68248618	mutL	DNA mismatch repair protein	COG0323	MutL, DNA mismatch repair enzyme (predicted ATPase)	DNA replication, recombination, & repair
NTHI0081	68248619	miaA	tRNA delta(2)-isopentenylpyrophosphate transferase	COG0324	MiaA, tRNA delta(2)-isopentenylpyrophosphate transferase	Translation, ribosomal structure & biogenesis
NTHI0082	68248620	glnE	glutamate-ammonia-ligase adenylyltransferase	COG1391	GlnE, Glutamine synthetase adenylyltransferase	Posttranslational modification, protein turnover, chaperones; Signal transduction
NTHI0083	68248621	recN	DNA repair protein RecN	COG0497	RecN, ATPase involved in DNA repair	DNA replication, recombination, & repair
NTHI0084	68248622	ppnK	inorganic polyphosphate/ATP-NAD kinase	COG0061	COG0061, Predicted sugar kinase	Carbohydrate transport & metabolism
NTHI0085	68248623	grpE	GrpE	COG0576	GrpE, Molecular chaperone GrpE (heat shock protein)	Posttranslational modification, protein turnover, chaperones
NTHI0086	68248624	---	hypothetical protein	COG1669	COG1669, Predicted nucleotidyltransferases	General function prediction only
NTHI0087	68248625	---	hypothetical protein	None	None	Function unknown
NTHI0088	68248626	nrdD	anaerobic ribonucleoside triphosphate reductase	COG1328	NrdD, Oxygen-sensitive ribonucleoside-triphosphate reductase	Nucleotide transport & metabolism
NTHI0089	68248627	tesB	Acyl-CoA thioesterase II	COG1946	TesB, Acyl-CoA thioesterase	Lipid metabolism
NTHI0091	68248628	cysS	cysteinyl-tRNA synthetase	COG0215	CysS, Cysteinyl-tRNA synthetase	Translation, ribosomal structure & biogenesis
NTHI0092	68248629	ppiB	peptidyl-prolyl cis-trans isomerase B	COG0652	PpiB, Peptidyl-prolyl cis-trans isomerase (rotamase) - cyclophilin family	Posttranslational modification, protein turnover, chaperones
NTHI0093	68248630	---	hypothetical protein	COG3692	COG3692, Uncharacterized protein conserved in bacteria	Function unknown
NTHI0095	68248631	tatD	putative deoxyribonuclease	COG0084	TatD, Mg-dependent DNase	DNA replication, recombination, & repair
NTHI0096	68248632	---	hypothetical protein	None	None	Function unknown
NTHI0097	68248633	metE	hypothetical protein	COG0620	MetE, Methionine synthase II (cobalamin-independent)	Amino acid transport & metabolism
NTHI0098	68248634	trxA	thioredoxin	COG3118	COG3118, Thioredoxin domain-containing protein	Posttranslational modification, protein turnover, chaperones
NTHI0099	68248635	ddh	D-lactate dehydrogenase	COG1052	LdhA, Lactate dehydrogenase and related dehydrogenases	Energy production & conversion; Coenzyme metabolism
NTHI0100	68248636	metB	cystathionine gamma-synthase	COG0626	MetB, Cystathionine beta-lyases/cystathionine gamma-synthases	Amino acid transport & metabolism
NTHI0101	68248637	soj	predicted ATPase	COG1192	Soj, ATPases involved in chromosome partitioning	Cell division & chromosome partitioning
NTHI0102	68248638	dnaB2	replicative DNA helicase	COG0305	DnaB, Replicative DNA helicase	DNA replication, recombination, & repair
NTHI0103	68248639	uxuA	hypothetical protein	COG1312	UxuA, D-mannonate dehydratase	Carbohydrate transport & metabolism
NTHI0104	68248640	---	hypothetical protein	None	None	Function unknown
NTHI0106	68248641	---	hypothetical protein	None	None	Function unknown
NTHI0107	68248642	---	hypothetical protein	None	None	Function unknown
NTHI0108	68248643	---	hypothetical protein	None	None	Function unknown
NTHI0109	68248644	ssb2	single-strand DNA-binding protein	COG0629	Ssb, Single-stranded DNA-binding protein	DNA replication, recombination, & repair
NTHI0110	68248645	---	conserved putative lipoprotein	None	None	Function unknown
NTHI0111	68248646	---	hypothetical protein	None	None	Function unknown
NTHI0112	68248647	topB2	DNA topoisomerase III	COG0550	TopA, Topoisomerase IA	DNA replication, recombination, & repair
NTHI0113	68248648	---	hypothetical protein	None	None	Function unknown
NTHI0114	68248649	---	hypothetical protein	None	None	Function unknown
NTHI0115	68248650	---	hypothetical protein	None	None	Function unknown
NTHI0116	68248651	---	hypothetical protein	None	None	Function unknown
NTHI0117	68248652	radC2	putative DNA repair radC-like protein	COG2003	RadC, DNA repair proteins	DNA replication, recombination, & repair
NTHI0118	68248653	---	hypothetical protein	None	None	Function unknown
NTHI0119	68248654	---	hypothetical protein	None	None	Function unknown
NTHI0120	68248655	pilL	conserved putative lipoprotein	None	None	Function unknown
NTHI0121	68248656	---	conserved putative exported protein	None	None	Function unknown
NTHI0122	68248657	---	conserved putative exported protein	COG0741	MltE, Soluble lytic murein transglycosylase and related regulatory proteins (some contain LysM/invasin domains)	Cell envelope biogenesis
NTHI0123	68248658	---	conserved putative exported protein	None	None	Function unknown
NTHI0125	68248659	---	hypothetical protein	COG3505	VirD4, Type IV secretory pathway, VirD4 components	Intracellular trafficking & secretion
NTHI0126	68248660	---	conserved putative membrane protein	None	None	Function unknown
NTHI0127	68248661	---	conserved putative exported protein	None	None	Function unknown
NTHI0128	68248662	---	conserved putative membrane protein	None	None	Function unknown
NTHI0129	68248663	---	conserved putative membrane protein	None	None	Function unknown
NTHI0130	68248664	---	conserved putative exported protein	None	None	Function unknown
NTHI0131	68248665	---	hypothetical protein	None	None	Function unknown
NTHI0132	68248666	---	conserved putative exported protein	None	None	Function unknown
NTHI0133	68248667	---	conserved putative lipoprotein	None	None	Function unknown
NTHI0134	68248668	virB4	hypothetical protein	COG3451	VirB4, Type IV secretory pathway, VirB4 components	Intracellular trafficking & secretion
NTHI0135	68248669	---	hypothetical protein	None	None	Function unknown
NTHI0136	68248670	---	hypothetical protein	None	None	Function unknown
NTHI0137	68248671	---	conserved putative membrane protein	None	None	Function unknown
NTHI0139	68248672	---	hypothetical protein	None	None	Function unknown
NTHI0140	68248674	---	hypothetical protein	None	None	Function unknown
NTHI0141	68248673	tnpA	transposon Tn3 transposase	COG4644	COG4644, Transposase and inactivated derivatives, TnpA family	DNA replication, recombination, & repair
NTHI0142	163000000	tnpR	transposon Tn3 resolvase	COG1961	PinR, Site-specific recombinases, DNA invertase Pin homologs	DNA replication, recombination, & repair
NTHI0143	68248676	---	hypothetical protein	None	None	Function unknown
NTHI0144	68248677	---	hypothetical protein	None	None	Function unknown
NTHI0145	68248678	---	conserved putative exported protein	COG3772	COG3772, Phage-related lysozyme (muraminidase)	General function prediction only
NTHI0146	68248679	---	conserved putative exported protein	None	None	Function unknown
NTHI0147	68248680	---	hypothetical protein	None	None	Function unknown
NTHI0148	68248681	---	hypothetical protein	None	None	Function unknown
NTHI0149	68248682	---	hypothetical protein	None	None	Function unknown
NTHI0150	68248683	---	hypothetical protein	None	None	Function unknown
NTHI0151	68248684	---	hypothetical protein	None	None	Function unknown
NTHI0152	68248685	traC	conserved putative antirestriction protein	COG4227	COG4227, Antirestriction protein	DNA replication, recombination, & repair
NTHI0153	68248686	---	possible type I restriction enzyme M subunit	COG0286	HsdM, Type I restriction-modification system methyltransferase subunit	Defense mechanisms
NTHI0154	68248687	---	hypothetical protein	None	None	Function unknown
NTHI0155	68248688	---	hypothetical protein	None	None	Function unknown
NTHI0156	68248689	---	hypothetical protein	None	None	Function unknown
NTHI0157	68248690	---	hypothetical protein	None	None	Function unknown
NTHI0158	68248691	---	resolvase/integrase-like protein	COG1961	PinR, Site-specific recombinases, DNA invertase Pin homologs	DNA replication, recombination, & repair
NTHI0159	68248692	---	hypothetical protein	None	None	Function unknown
NTHI0160	68248693	---	hypothetical protein	None	None	Function unknown
NTHI0161	68248694	---	hypothetical protein	None	None	Function unknown
NTHI0162	68248695	---	hypothetical protein	None	None	Function unknown
NTHI0163	68248696	---	hypothetical protein	COG3481	COG3481, Predicted HD-superfamily hydrolase	General function prediction only
NTHI0164	68248697	---	putative site-specific recombinase	COG4974	XerD, Site-specific recombinase XerD	DNA replication, recombination, & repair
NTHI0165	68248698	thrC	threonine synthase	COG0498	ThrC, Threonine synthase	Amino acid transport & metabolism
NTHI0166	68248699	thrB	homoserine kinase	COG0083	ThrB, Homoserine kinase	Amino acid transport & metabolism
NTHI0167	68248700	thrA	bifunctional aspartokinase I/homeserine dehydrogenase I	COG0527	LysC, Aspartokinases	Amino acid transport & metabolism
NTHI0168	68248701	---	hypothetical protein	COG0325	COG0325, Predicted enzyme with a TIM-barrel fold	General function prediction only
NTHI0169	68248702	grk	glycerate kinase	COG1929	COG1929, Glycerate kinase	Carbohydrate transport & metabolism
NTHI0171	68248703	---	hypothetical protein	COG2610	GntT, H+/gluconate symporter and related permeases	Amino acid transport & metabolism; Carbohydrate transport & metabolism
NTHI0172	68248704	---	hypothetical protein	COG3835	CdaR, Sugar diacid utilization regulator	Translation, ribosomal structure & biogenesis
NTHI0173	68248705	---	hypothetical protein	COG2610	GntT, H+/gluconate symporter and related permeases	Amino acid transport & metabolism; Carbohydrate transport & metabolism
NTHI0175	68248706	---	hypothetical protein	COG2226	UbiE, Methylase involved in ubiquinone/menaquinone biosynthesis	Coenzyme metabolism
NTHI0176	68248707	---	hypothetical protein	None	None	Function unknown
NTHI0177	68248708	hitA	iron-utilization periplasmic protein hFbpA	COG1840	AfuA, ABC-type Fe3+ transport system, periplasmic component	Inorganic ion transport & metabolism
NTHI0179	68248709	hitB	iron(III)-transport system permease protein hFbpB	COG1178	ThiP, ABC-type Fe3+ transport system, permease component	Inorganic ion transport & metabolism
NTHI0180	68248710	hitC	iron-utilization ATP-binding protein hFbpC	COG3842	PotA, ABC-type spermidine/putrescine transport systems, ATPase components	Amino acid transport & metabolism
NTHI0181	68248711	---	putative D-alanyl-D-alanine carboxypeptidase	COG1876	VanY, D-alanyl-D-alanine carboxypeptidase	Cell envelope biogenesis
NTHI0182	68248712	dapE	succinyl-diaminopimelate desuccinylase	COG0624	ArgE, Acetylornithine deacetylase/Succinyl-diaminopimelate desuccinylase and related deacylases	Amino acid transport & metabolism
NTHI0184	68248713	---	hypothetical protein	COG1393	ArsC, Arsenate reductase and related proteins, glutaredoxin family	Inorganic ion transport & metabolism
NTHI0185	68248714	htpG	heat shock protein 90	COG0326	HtpG, Molecular chaperone, HSP90 family	Posttranslational modification, protein turnover, chaperones
NTHI0186	68248715	---	conserved hypothetical NIF3-like protein	COG0327	COG0327, Uncharacterized conserved protein	Function unknown
NTHI0188	68248716	hsdM1	putative type I restriction-modification methyltransferase subunit	COG0286	HsdM, Type I restriction-modification system methyltransferase subunit	Defense mechanisms
NTHI0190	68248717	---	predicted transcriptional regulator containing an HTH domain	COG2865	COG2865, Predicted transcriptional regulator containing an HTH domain and an uncharacterized domain shared with the mammalian protein Schlafen	Transcription
NTHI0192	68248718	hsdS1	putative type I site-specific restriction-modification system, S subunit	COG0732	HsdS, Restriction endonuclease S subunits	Defense mechanisms
NTHI0193	68248719	hsdR1	putative type I site-specific restriction-modification system, R subunit	COG0610	COG0610, Type I site-specific restriction-modification system, R (restriction) subunit and related helicases	Defense mechanisms
NTHI0194	68248720	ffh	Signal recognition particle protein	COG0541	Ffh, Signal recognition particle GTPase	Intracellular trafficking & secretion
NTHI0196	68248721	corB	putative Mg2+ and Co2+ transporter	COG4536	CorB, Putative Mg2+ and Co2+ transporter CorB	Inorganic ion transport & metabolism
NTHI0197	68248722	---	hypothetical protein	COG2966	COG2966, Uncharacterized conserved protein	Function unknown
NTHI0198	68248723	---	hypothetical protein	COG3610	COG3610, Uncharacterized conserved protein	Function unknown
NTHI0199	68248724	---	hypothetical protein	COG3765	WzzB, Chain length determinant protein	Cell envelope biogenesis
NTHI0200	68248725	serS	seryl-tRNA synthetase	COG0172	SerS, Seryl-tRNA synthetase	Translation, ribosomal structure & biogenesis
NTHI0201	68248726	gst	glutathione S-transferase	COG0625	Gst, Glutathione S-transferase	Posttranslational modification, protein turnover, chaperones
NTHI0201_1	68248727	---	hypothetical protein	COG2963	COG2963, Transposase and inactivated derivatives	DNA replication, recombination, & repair
NTHI0202	68248728	hemR	hemin receptor	COG1629	CirA, Outer membrane receptor proteins, mostly Fe transport	Inorganic ion transport & metabolism
NTHI0203	68248729	---	possible SAM-dependent methyltransferase	COG0116	COG0116, Predicted N6-adenine-specific DNA methylase	DNA replication, recombination, & repair
NTHI0205	68248730	mltA	murein transglycosylase A	COG2821	MltA, Membrane-bound lytic murein transglycosylase	Cell envelope biogenesis
NTHI0206	68248731	---	hypothetical protein	COG1179	COG1179, Dinucleotide-utilizing enzymes involved in molybdopterin and thiamine biosynthesis family 1	Coenzyme metabolism
NTHI0208	68248732	znuA	high-affinity zinc transporter periplasmic component	COG4531	ZnuA, ABC-type Zn2+ transport system, periplasmic component/surface adhesin	Inorganic ion transport & metabolism
NTHI0209	68248733	---	hypothetical protein	COG5413	COG5413, Uncharacterized integral membrane protein	Function unknown
NTHI0210	68248734	mpl	UDP-N-acetylmuramate:L-alanyl-gamma-D-glutamyl-meso-diaminopimelate ligase	COG0773	MurC, UDP-N-acetylmuramate-alanine ligase	Cell envelope biogenesis
NTHI0211	68248735	metC	cystathionine beta-lyase	COG0626	MetC, Cystathionine beta-lyases/cystathionine gamma-synthases	Amino acid transport & metabolism
NTHI0212	68248736	tsaA	probable peroxiredoxin	COG0450	AhpC, Peroxiredoxin	Posttranslational modification, protein turnover, chaperones
NTHI0213	68248737	pgsA	CDP-diacylglycerol--glycerol-3-phosphate 3-phosphatidyltransferase	COG0558	PgsA, Phosphatidylglycerophosphate synthase	Lipid metabolism
NTHI0214	68248738	ppa	inorganic pyrophosphatase	COG0221	Ppa, Inorganic pyrophosphatase	Energy production & conversion
NTHI0215	68248739	---	hypothetical protein	COG2252	COG2252, Permeases	General function prediction only
NTHI0218	68248740	udk	uridine kinase	COG0572	Udk, Uridine kinase	Nucleotide transport & metabolism
NTHI0219	68248741	dcd	deoxycytidine triphosphate deaminase	COG0717	Dcd, Deoxycytidine deaminase	Nucleotide transport & metabolism
NTHI0220	68248742	asmA	hypothetical protein	COG2982	AsmA, Uncharacterized protein involved in outer membrane biogenesis	Cell envelope biogenesis
NTHI0221	68248743	araJ	sugar efflux transporter	COG2814	AraJ, Arabinose efflux permease	Carbohydrate transport & metabolism
NTHI0222	68248744	engA	GTP-binding protein EngA	COG1160	COG1160, Predicted GTPases	General function prediction only
NTHI0223	68248745	dnaQ	DNA polymerase III subunit epsilon	COG0847	DnaQ, DNA polymerase III, epsilon subunit and related 3'-5' exonucleases	DNA replication, recombination, & repair
NTHI0224	68248746	rnhA	ribonuclease H	COG0328	RnhA, Ribonuclease HI	DNA replication, recombination, & repair
NTHI0225	68248747	ompP2	Outer membrane protein P2 precursor	COG3203	OmpC, Outer membrane protein (porin)	Cell envelope biogenesis
NTHI0226	68248748	nagA	N-acetylglucosamine-6-phosphate deacetylase	COG1820	NagA, N-acetylglucosamine-6-phosphate deacetylase	Carbohydrate transport & metabolism
NTHI0227	68248749	nagB	glucosamine-6-phosphate deaminase	COG0363	NagB, 6-phosphogluconolactonase/Glucosamine-6-phosphate isomerase/deaminase	Carbohydrate transport & metabolism
NTHI0228	68248750	nanA	N-acetylneuraminate lyase	COG0329	DapA, Dihydrodipicolinate synthase/N-acetylneuraminate lyase	Amino acid transport & metabolism; Cell envelope biogenesis
NTHI0229	68248751	rpiR	putative HTH-type transcriptional regulator	COG1737	RpiR, Transcriptional regulators	Transcription
NTHI0230	68248752	nanK	N-acetylmannosamine kinase	COG1940	NagC, Transcriptional regulator/sugar kinase	Transcription; Carbohydrate transport & metabolism
NTHI0231	68248753	nanE	N-acetylmannosamine-6-phosphate 2-epimerase	COG3010	NanE, Putative N-acetylmannosamine-6-phosphate epimerase	Carbohydrate transport & metabolism
NTHI0232	68248754	siaP	putative sialic acid transporter, TRAP-type C4-dicarboxylate transport system, periplasmic component	COG1638	DctP, TRAP-type C4-dicarboxylate transport system, periplasmic component	Carbohydrate transport & metabolism
NTHI0234	68248755	siaT	putative sialic acid transporter, TRAP-type C4-dicarboxylate transport system, large permease component	COG1593	DctQ, TRAP-type C4-dicarboxylate transport system, large permease component	Carbohydrate transport & metabolism
NTHI0235	68248756	---	hypothetical protein	COG3055	COG3055, Uncharacterized protein conserved in bacteria	Function unknown
NTHI0236	68248757	---	putative protein-S-isoprenylcysteine methyltransferase	COG2020	STE14, Putative protein-S-isoprenylcysteine methyltransferase	Posttranslational modification, protein turnover, chaperones
NTHI0237	68248758	hflC	HflC	COG0330	HflC, Membrane protease subunits, stomatin/prohibitin homologs	Posttranslational modification, protein turnover, chaperones
NTHI0239	68248759	hflK	HflK	COG0330	HflC, Membrane protease subunits, stomatin/prohibitin homologs	Posttranslational modification, protein turnover, chaperones
NTHI0240	68248760	sfp	putative 4'-phosphopantetheinyl transferase	COG2091	Sfp, Phosphopantetheinyl transferase	Coenzyme metabolism
NTHI0242	68248761	dcuB2	anaerobic C4-dicarboxylate transporter	COG2704	DcuB, Anaerobic C4-dicarboxylate transporter	General function prediction only
NTHI0243	68248762	acpP	acyl carrier protein	COG0236	AcpP, Acyl carrier protein	Lipid metabolism; Secondary metabolite biosynthesis, transport, & catabolism
NTHI0244	68248763	fabG	3-ketoacyl-(acyl-carrier-protein) reductase	COG1028	FabG, Dehydrogenases with different specificities (related to short-chain alcohol dehydrogenases)	Secondary metabolite biosynthesis, transport, & catabolism
NTHI0245	68248764	fabD	acyl carrier protein S-malonyltransferase	COG0331	FabD, (acyl-carrier-protein) S-malonyltransferase	Lipid metabolism
NTHI0247	68248765	fabH	3-oxoacyl-(acyl carrier protein) synthase III	COG0332	FabH, 3-oxoacyl-	Secondary metabolite biosynthesis, transport, & catabolism
NTHI0248	68248766	rpmF	50S ribosomal protein L32	COG0333	RpmF, Ribosomal protein L32	Translation, ribosomal structure & biogenesis
NTHI0249	68248767	---	hypothetical protein	COG1399	COG1399, Predicted metal-binding, possibly nucleic acid-binding protein	General function prediction only
NTHI0250	68248768	psd	phosphatidylserine decarboxylase	COG0688	Psd, Phosphatidylserine decarboxylase	Lipid metabolism
NTHI0251	68248769	gor	glutathione reductase	COG1249	Lpd, Pyruvate/2-oxoglutarate dehydrogenase complex, dihydrolipoamide dehydrogenase (E3) component, and related enzymes	Energy production & conversion
NTHI0252	68248770	---	conserved hypothetical lipoprotein	COG3056	COG3056, Uncharacterized lipoprotein	Cell envelope biogenesis
NTHI0254	68248771	nqrA	Na(+)-translocating NADH-quinone reductase subunit A	COG1726	NqrA, Na+-transporting NADH:ubiquinone oxidoreductase, subunit NqrA	Energy production & conversion
NTHI0255	68248772	nqrB	Na(+)-translocating NADH-quinone reductase subunit B	COG1805	NqrB, Na+-transporting NADH:ubiquinone oxidoreductase, subunit NqrB	Energy production & conversion
NTHI0256	68248773	nqrC	Na(+)-translocating NADH-quinone reductase subunit C	COG2869	NqrC, Na+-transporting NADH:ubiquinone oxidoreductase, subunit NqrC	Energy production & conversion
NTHI0257	68248774	nqrD	Na(+)-translocating NADH-quinone reductase subunit D	COG1347	NqrD, Na+-transporting NADH:ubiquinone oxidoreductase, subunit NqrD	Energy production & conversion
NTHI0258	68248775	nqrE	Na(+)-translocating NADH-quinone reductase subunit E	COG2209	NqrE, Na+-transporting NADH:ubiquinone oxidoreductase, subunit NqrE	Energy production & conversion
NTHI0259	68248776	nqrF	Na(+)-translocating NADH-quinone reductase subunit F	COG2871	NqrF, Na+-transporting NADH:ubiquinone oxidoreductase, subunit NqrF	Energy production & conversion
NTHI0260	68248777	apbE	thiamine biosynthesis lipoprotein ApbE	COG1477	ApbE, Membrane-associated lipoprotein involved in thiamine biosynthesis	Coenzyme metabolism
NTHI0261	68248778	---	hypothetical protein	COG2991	COG2991, Uncharacterized protein conserved in bacteria	Function unknown
NTHI0262	68248779	trmU	tRNA (5-methylaminomethyl-2-thiouridylate)-methyltransferase	COG0482	TrmU, Predicted tRNA(5-methylaminomethyl-2-thiouridylate) methyltransferase, contains the PP-loop ATPase domain	Translation, ribosomal structure & biogenesis
NTHI0263	68248780	---	hypothetical protein	COG1496	COG1496, Uncharacterized conserved protein	Function unknown
NTHI0264	68248781	rluD	23S rRNA pseudouridine synthase D	COG0564	RluA, Pseudouridylate synthases, 23S RNA-specific	Translation, ribosomal structure & biogenesis
NTHI0266	68248782	comL	conserved hypothetical lipoprotein	COG4105	ComL, DNA uptake lipoprotein	General function prediction only
NTHI0267	68248783	---	hypothetical protein	None	None	Function unknown
NTHI0268	68248784	pflA	pyruvate formate lyase-activating enzyme 1	COG1180	PflA, Pyruvate-formate lyase-activating enzyme	Posttranslational modification, protein turnover, chaperones
NTHI0269	68248785	pflB	formate acetyltransferase	COG1882	PflD, Pyruvate-formate lyase	Energy production & conversion
NTHI0270	68248786	focA	probable formate transporter	COG2116	FocA, Formate/nitrite family of transporters	Inorganic ion transport & metabolism
NTHI0273	68248787	nagC	N-acetyl-D-glucosamine kinase	COG1940	NagC, Transcriptional regulator/sugar kinase	Transcription; Carbohydrate transport & metabolism
NTHI0274	68248788	alsT	putative Na+/alanine symporter	COG1115	AlsT, Na+/alanine symporter	Amino acid transport & metabolism
NTHI0275	68248789	---	hypothetical protein	COG0627	COG0627, Predicted esterase	General function prediction only
NTHI0278	68248790	soxR	putative HTH-type transcriptional regulator	COG0789	SoxR, Predicted transcriptional regulators	Transcription
NTHI0279	68248791	tatA	Sec-independent protein translocase protein TatA/E	COG1826	TatA, Sec-independent protein secretion pathway components	Intracellular trafficking & secretion
NTHI0280	68248792	tatB	sec-independent translocase	COG1826	TatA, Sec-independent protein secretion pathway components	Intracellular trafficking & secretion
NTHI0282	68248793	tatC	Sec-independent protein translocase protein TatC	COG0805	TatC, Sec-independent protein secretion pathway component TatC	Intracellular trafficking & secretion
NTHI0283	68248794	gdhA	glutamate dehydrogenase	COG0334	GdhA, Glutamate dehydrogenase/leucine dehydrogenase	Amino acid transport & metabolism
NTHI0284	68248795	fur	Ferric uptake regulation protein	COG0735	Fur, Fe2+/Zn2+ uptake regulation proteins	Inorganic ion transport & metabolism
NTHI0285	68248796	fldA	flavodoxin FldA	COG0716	FldA, Flavodoxins	Energy production & conversion
NTHI0286	68248797	mhpC	putative esterase/lipase	COG0596	MhpC, Predicted hydrolases or acyltransferases (alpha/beta hydrolase superfamily)	General function prediction only
NTHI0289	68248798	seqA	replication initiation regulator SeqA	COG3057	SeqA, Negative regulator of replication initiationR	DNA replication, recombination, & repair
NTHI0290	68248799	menE	O-succinylbenzoic acid--CoA ligase	COG0318	CaiC, Acyl-CoA synthetases (AMP-forming)/AMP-acid ligases II	Lipid metabolism; Secondary metabolite biosynthesis, transport, & catabolism
NTHI0291	68248800	---	potassium efflux protein KefA	COG3264	COG3264, Small-conductance mechanosensitive channel	Cell envelope biogenesis
NTHI0292	68248801	aroC	chorismate synthase	COG0082	AroC, Chorismate synthase	Amino acid transport & metabolism
NTHI0294	68248802	mepA	penicillin-insensitive murein endopeptidase	COG3770	MepA, Murein endopeptidase	Cell envelope biogenesis
NTHI0295	68248803	---	concerved hypothetical protein	COG0730	COG0730, Predicted permeases	General function prediction only
NTHI0296	68248804	msbB	lipid A biosynthesis (KDO)2-(lauroyl)-lipid IVA acyltransferase	COG1560	HtrB, Lauroyl/myristoyl acyltransferase	Cell envelope biogenesis
NTHI0297	68248805	selD	selenide, water dikinase	COG0709	SelD, Selenophosphate synthase	Amino acid transport & metabolism
NTHI0298	68248806	rplS	50S ribosomal protein L19	COG0335	RplS, Ribosomal protein L19	Translation, ribosomal structure & biogenesis
NTHI0299	68248807	trmD	tRNA (guanine-N(1)-)-methyltransferase	COG0336	TrmD, tRNA-(guanine-N1)-methyltransferase	Translation, ribosomal structure & biogenesis
NTHI0300	68248808	rimM	16S rRNA-processing protein	COG0806	RimM, RimM protein, required for 16S rRNA processing	Translation, ribosomal structure & biogenesis
NTHI0301	68248809	rpsP	30S ribosomal protein S16	COG0228	RpsP, Ribosomal protein S16	Translation, ribosomal structure & biogenesis
NTHI0302	68248810	---	hypothetical protein	None	None	Function unknown
NTHI0303	68248811	nadN	NAD nucleotidase	COG0737	UshA, 5'-nucleotidase/2',3'-cyclic phosphodiesterase and related esterases	Nucleotide transport & metabolism
NTHI0305	68248812	aroK	shikimate kinase	COG0703	AroK, Shikimate kinase	Amino acid transport & metabolism
NTHI0306	68248813	aroB	3-dehydroquinate synthase	COG0337	AroB, 3-dehydroquinate synthetase	Amino acid transport & metabolism
NTHI0307	68248814	dam	DNA adenine methylase	COG0338	Dam, Site-specific DNA methylase	DNA replication, recombination, & repair
NTHI0307_1	68248815	---	hypothetical protein	None	None	Function unknown
NTHI0308	68248816	pgpB	phosphatidylglycerophosphatase B	COG0671	PgpB, Membrane-associated phospholipid phosphatase	Lipid metabolism
NTHI0309	68248817	ribA	GTP cyclohydrolase II	COG0807	RibA, GTP cyclohydrolase II	Coenzyme metabolism
NTHI0310	68248818	oppA	putative ABC-type oligopeptide transport system, periplasmic component	COG4166	OppA, ABC-type oligopeptide transport system, periplasmic component	Amino acid transport & metabolism
NTHI0311	68248819	---	hypothetical protein	COG2832	COG2832, Uncharacterized protein conserved in bacteria	Function unknown
NTHI0312	68248820	prlC	oligopeptidase A	COG0339	Dcp, Zn-dependent oligopeptidases	Amino acid transport & metabolism
NTHI0314	68248821	hsdM2	putative type I restriction-modification methyltransferase subunit	COG0286	HsdM, Type I restriction-modification system methyltransferase subunit	Defense mechanisms
NTHI0315	68248822	hsdS2	putative type I restriction-modification specificity protein	COG0732	HsdS, Restriction endonuclease S subunits	Defense mechanisms
NTHI0316	68248823	prrC	putative anticodon nuclease	COG4694	COG4694, Uncharacterized protein conserved in bacteria	Function unknown
NTHI0317	68248824	---	conserved hypothetical DNA binding protein	COG3943	COG3943, Virulence protein	General function prediction only
NTHI0318	68248825	hsdR2	putative type I restriction-modification system	COG0610	COG0610, Type I site-specific restriction-modification system, R (restriction) subunit and related helicases	Defense mechanisms
NTHI0319	68248826	---	hypothetical protein	COG3059	COG3059, Predicted membrane protein	Function unknown
NTHI0321	68248827	arcB	aerobic respiration control sensor protein ArcB	COG0642	BaeS, Signal transduction histidine kinase	Signal transduction
NTHI0322	68248828	---	predicted uracil-DNA glycosylase	COG1573	COG1573, Uracil-DNA glycosylase	DNA replication, recombination, & repair
NTHI0323	68248829	birA	biotin--protein ligase	COG0340	BirA, Biotin-(acetyl-CoA carboxylase) ligase	Coenzyme metabolism
NTHI0324	68248830	guaB	inositol-5-monophosphate dehydrogenase	COG0516	GuaB, IMP dehydrogenase/GMP reductase	Nucleotide transport & metabolism
NTHI0326	68248831	guaA	bifunctional GMP synthase/glutamine amidotransferase protein	COG0519	GuaA, GMP synthase, PP-ATPase domain/subunit	Nucleotide transport & metabolism
NTHI0327	68248832	rarD	hypothetical protein	COG2962	RarD, Predicted permeases	General function prediction only
NTHI0328	68248833	lrp	putative transcriptional regulator	COG1522	Lrp, Transcriptional regulators	Transcription
NTHI0329	68248834	nhaA	Na(+)/H(+) antiporter 1	COG3004	NhaA, Na+/H+ antiporter	Inorganic ion transport & metabolism
NTHI0331	68248835	brnQ	branched-chain amino acid transport system carrier protein	COG1114	BrnQ, Branched-chain amino acid permeases	Amino acid transport & metabolism
NTHI0332	68248836	ebgC	hypothetical protein	COG2731	EbgC, Beta-galactosidase, beta subunit	Carbohydrate transport & metabolism
NTHI0333	68248837	rfaJ	hypothetical protein	COG1442	RfaJ, Lipopolysaccharide biosynthesis proteins, LPS:glycosyltransferases	Cell envelope biogenesis
NTHI0334	68248838	pnp	polynucleotide phosphorylase/polyadenylase	COG1185	Pnp, Polyribonucleotide nucleotidyltransferase (polynucleotide phosphorylase)	Translation, ribosomal structure & biogenesis
NTHI0335	68248839	nlpL	lipoprotein NlpI	COG4785	NlpI, Lipoprotein NlpI, contains TPR repeats	General function prediction only
NTHI0337	68248840	deaD	Cold-shock DEAD-box protein A homolog	COG0513	SrmB, Superfamily II DNA and RNA helicases	DNA replication, recombination, & repair; Transcription; Translation, ribosomal structure & biogenesis
NTHI0338	68248841	---	predicted soluble lytic transglycosylase	COG4623	COG4623, Predicted soluble lytic transglycosylase fused to an ABC-type amino acid-binding protein	Cell envelope biogenesis
NTHI0339	68248842	---	hypothetical protein	None	None	Function unknown
NTHI0340	68248843	---	hypothetical protein	None	None	Function unknown
NTHI0342	68248844	---	hypothetical protein	COG3036	COG3036, Uncharacterized protein conserved in bacteria	Function unknown
NTHI0343	68248845	arsC	putative arsenate reductase	COG1393	ArsC, Arsenate reductase and related proteins, glutaredoxin family	Inorganic ion transport & metabolism
NTHI0344	68248846	perM	putative permease PerM homolog	COG0628	PerM, Predicted permease	General function prediction only
NTHI0345	68248847	secF	preprotein translocase subunit SecF	COG0341	SecF, Preprotein translocase subunit SecF	Intracellular trafficking & secretion
NTHI0346	68248848	secD	preprotein translocase subunit SecD	COG0342	SecD, Preprotein translocase subunit SecD	Intracellular trafficking & secretion
NTHI0347	68248849	yajC	preprotein translocase subunit YajC	COG1862	YajC, Preprotein translocase subunit YajC	Intracellular trafficking & secretion
NTHI0348	68248850	sirA	predicted redox protein, regulator of disulfide bond formation	COG0425	SirA, Predicted redox protein, regulator of disulfide bond formation	Posttranslational modification, protein turnover, chaperones
NTHI0349	68248851	---	hypothetical protein	None	None	Function unknown
NTHI0350	68248852	tgt	queuine tRNA-ribosyltransferase	COG0343	Tgt, Queuine/archaeosine tRNA-ribosyltransferase	Translation, ribosomal structure & biogenesis
NTHI0351	68248853	queA	S-adenosylmethionine:tRNA ribosyltransferase-isomerase	COG0809	QueA, S-adenosylmethionine:tRNA-ribosyltransferase-isomerase (queuine synthetase)	Translation, ribosomal structure & biogenesis
NTHI0353	68248854	---	hypothetical protein	None	None	Function unknown
NTHI0354	68248855	aidA	adhesion and penetration protein Hap	COG3468	AidA, Type V secretory pathway, adhesin AidA	Cell envelope biogenesis; Intracellular trafficking & secretion
NTHI0355	68248856	uvrA	excinuclease ABC subunit A	COG0178	UvrA, Excinuclease ATPase subunit	DNA replication, recombination, & repair
NTHI0356	68248857	ssb	single-strand DNA-binding protein	COG0629	Ssb, Single-stranded DNA-binding protein	DNA replication, recombination, & repair
NTHI0358	68248858	tonB	TonB	COG0810	TonB, Periplasmic protein TonB, links inner and outer membranes	Cell envelope biogenesis
NTHI0359	68248859	exbD	transport protein ExbD	COG0848	ExbD, Biopolymer transport protein	Intracellular trafficking & secretion
NTHI0360	68248860	exbB	transport protein ExbB	COG0811	TolQ, Biopolymer transport proteins	Intracellular trafficking & secretion
NTHI0361	68248861	bcp	thioredoxin-dependent thiol peroxidase	COG1225	Bcp, Peroxiredoxin	Posttranslational modification, protein turnover, chaperones
NTHI0362	68248862	dapA	dihydrodipicolinate synthase	COG0329	DapA, Dihydrodipicolinate synthase/N-acetylneuraminate lyase	Amino acid transport & metabolism; Cell envelope biogenesis
NTHI0363	68248863	nlpB	conserved hypothetical lipoprotein	COG3317	NlpB, Uncharacterized lipoprotein	Cell envelope biogenesis
NTHI0364	68248864	---	hypothetical protein	COG1544	COG1544, Ribosome-associated protein Y (PSrp-1)	Translation, ribosomal structure & biogenesis
NTHI0365	68248865	lgtC	UDP-galactose--lipooligosaccharide galactosyltransferase	COG1442	RfaJ, Lipopolysaccharide biosynthesis proteins, LPS:glycosyltransferases	Cell envelope biogenesis
NTHI0366	68248866	orfM	putative deoxyribonucleotide triphosphate pyrophosphatase	COG0127	COG0127, Xanthosine triphosphate pyrophosphatase	Nucleotide transport & metabolism
NTHI0367	68248867	kdkA	3-deoxy-D-manno-octulosonic-acid kinase	COG0478	COG0478, RIO-like serine/threonine protein kinase fused to N-terminal HTH domain	Signal transduction
NTHI0368	68248868	opsX	ADP-heptose--lipooligosaccharide heptosyltransferase I	COG0859	RfaF, ADP-heptose:LPS heptosyltransferase	Cell envelope biogenesis
NTHI0369	68248869	hxuC	heme/hemopexin-binding protein C	COG1629	CirA, Outer membrane receptor proteins, mostly Fe transport	Inorganic ion transport & metabolism
NTHI0370	68248870	hxuB	heme/hemopexin-binding protein B	COG2831	FhaC, Hemolysin activation/secretion protein	Intracellular trafficking & secretion
NTHI0371	68248871	hxuA	heme/hemopexin-binding protein A	COG3210	FhaB, Large exoproteins involved in heme utilization or adhesion	Intracellular trafficking & secretion
NTHI0372	68248872	folB	dihydroneopterin aldolase	COG1539	FolB, Dihydroneopterin aldolase	Coenzyme metabolism
NTHI0373	68248873	---	hypothetical protein	COG0344	COG0344, Predicted membrane protein	Function unknown
NTHI0374	68248874	narQ	nitrate/nitrite sensor protein NarQ	COG3850	NarQ, Signal transduction histidine kinase, nitrate/nitrite-specific	Signal transduction
NTHI0375	68248875	murB	UDP-N-acetylenolpyruvoylglucosamine reductase	COG0812	MurB, UDP-N-acetylmuramate dehydrogenase	Cell envelope biogenesis
NTHI0376	68248876	rpoH	RNA polymerase factor sigma-32	COG0568	RpoD, DNA-directed RNA polymerase, sigma subunit (sigma70/sigma32)	Transcription
NTHI0379	68248877	djlA	Dna-J like membrane chaperone protein	COG1076	DjlA, DnaJ-domain-containing proteins 1	Posttranslational modification, protein turnover, chaperones
NTHI0380	68248878	pyrE	orotate phosphoribosyltransferase	COG0461	PyrE, Orotate phosphoribosyltransferase	Nucleotide transport & metabolism
NTHI0381	68248879	rph	ribonuclease PH	COG0689	Rph, RNase PH	Translation, ribosomal structure & biogenesis
NTHI0382	68248880	gltX	glutamyl-tRNA synthetase	COG0008	GlnS, Glutamyl- and glutaminyl-tRNA synthetases	Translation, ribosomal structure & biogenesis
NTHI0383	68248881	lpt6	PE-tn-6--lipooligosaccharide phosphorylethanolamine transferase	COG1368	MdoB, Phosphoglycerol transferase and related proteins, alkaline phosphatase superfamily	Cell envelope biogenesis
NTHI0384	68248882	rbn	ribonuclease BN	COG1295	Rbn, Predicted membrane protein	Function unknown
NTHI0386	68248883	---	hypothetical protein	COG3012	COG3012, Uncharacterized protein conserved in bacteria	Function unknown
NTHI0387	68248884	---	hypothetical protein	COG2258	COG2258, Uncharacterized protein conserved in bacteria	Function unknown
NTHI0389	162000000	udp	uridine phosphorylase	COG2820	Udp, Uridine phosphorylase	Nucleotide transport & metabolism
NTHI0390	68248886	araJ	conserved hypothetical metabolite transport protein	COG2814	AraJ, Arabinose efflux permease	Carbohydrate transport & metabolism
NTHI0391	68248887	yfbB	acyl-CoA thioester hydrolase YfbB	COG0596	MhpC, Predicted hydrolases or acyltransferases (alpha/beta hydrolase superfamily)	General function prediction only
NTHI0392	68248888	menD	2-succinyl-6-hydroxy-2,4-cyclohexadiene-1-carboxylic acid synthase/2-oxoglutarate decarboxylase	COG1165	MenD, 2-succinyl-6-hydroxy-2,4-cyclohexadiene-1-carboxylate synthase	Coenzyme metabolism
NTHI0393	68248889	menF	menaquinone-specific isochorismate synthase	COG1169	MenF, Isochorismate synthase	Coenzyme metabolism; Secondary metabolite biosynthesis, transport, & catabolism
NTHI0395	68248890	aspC3	aminotransferase AlaT	COG0436	COG0436, Aspartate/tyrosine/aromatic aminotransferase	Amino acid transport & metabolism
NTHI0396	68248891	mtr	tryptophan-specific transport protein	COG0814	SdaC, Amino acid permeases	Amino acid transport & metabolism
NTHI0397	68248892	sdaA	L-serine dehydratase	COG1760	SdaA, L-serine deaminase	Amino acid transport & metabolism
NTHI0398	68248893	sdaC	Serine transporter	COG0814	SdaC, Amino acid permeases	Amino acid transport & metabolism
NTHI0399	68248894	zntA	probable cation-transporting ATPase	COG2217	ZntA, Cation transport ATPase	Inorganic ion transport & metabolism
NTHI0403	68248895	soxR	probable heavy metal dependent transcriptional regulator	COG0789	SoxR, Predicted transcriptional regulators	Transcription
NTHI0404	68248896	metJ	transcriptional repressor protein MetJ	COG3060	MetJ, Transcriptional regulator of met regulon	Transcription; Amino acid transport & metabolism
NTHI0405	68248897	rho	transcription termination factor Rho	COG1158	Rho, Transcription termination factor	Transcription
NTHI0406	68248898	pilD	putative type 4 prepilin-like protein specific leader peptidase	COG1989	PulO, Type II secretory pathway, prepilin signal peptidase PulO and related peptidases	Cell motility & secretion; Posttranslational modification, protein turnover, chaperones; Intracellular trafficking & secretion
NTHI0407	68248899	pilC	putative type IV pilin secretion protein	COG1459	PulF, Type II secretory pathway, component PulF	Cell motility & secretion; Intracellular trafficking & secretion
NTHI0408	68248900	pilB	putative type IV pilin secretion protein	COG2804	PulE, Type II secretory pathway, ATPase PulE/Tfp pilus assembly pathway, ATPase PilB	Cell motility & secretion; Intracellular trafficking & secretion
NTHI0409	68248901	pilA	Type IV pilin subunit protein	COG4969	PilA, Tfp pilus assembly protein, major pilin PilA	Cell motility & secretion; Intracellular trafficking & secretion
NTHI0411	68248902	ampD	N-acetyl-anhydromuranmyl-L-alanine amidase	COG3023	AmpD, Negative regulator of beta-lactamase expression	Defense mechanisms
NTHI0412	68248903	corC	magnesium and cobalt efflux protein CorC	COG4535	CorC, Putative Mg2+ and Co2+ transporter CorC	Inorganic ion transport & metabolism
NTHI0413	68248904	lnt	apolipoprotein N-acyltransferase	COG0815	Lnt, Apolipoprotein N-acyltransferase	Cell envelope biogenesis
NTHI0414	68248905	---	hypothetical protein	COG1385	COG1385, Uncharacterized protein conserved in bacteria	Function unknown
NTHI0415	68248906	---	hypothetical protein	COG1678	COG1678, Putative transcriptional regulator	Transcription
NTHI0416	68248907	ruvX	Holliday junction resolvase-like protein	COG0816	COG0816, Predicted endonuclease involved in recombination (possible Holliday junction resolvase in Mycoplasmas and B. subtilis)	DNA replication, recombination, & repair
NTHI0419	68248908	xerC	prophage CP4-57-like integrase	COG0582	XerC, Integrase	DNA replication, recombination, & repair
NTHI0420	68248909	---	hypothetical protein	COG1813	COG1813, Predicted transcription factor, homolog of eukaryotic MBF1	Transcription
NTHI0421	68248910	---	hypothetical protein	None	None	Function unknown
NTHI0422	68248911	---	hypothetical protein	COG3680	COG3680, Uncharacterized protein conserved in bacteria	Function unknown
NTHI0423	68248912	---	hypothetical protein	None	None	Function unknown
NTHI0424	68248913	---	hypothetical protein	None	None	Function unknown
NTHI0425	68248914	---	hypothetical protein	None	None	Function unknown
NTHI0426	68248915	proC	pyrroline-5-carboxylate reductase	COG0345	ProC, Pyrroline-5-carboxylate reductase	Amino acid transport & metabolism
NTHI0427	68248916	hcaT	putative 3-phenylpropionic acid transporter	COG2814	AraJ, Arabinose efflux permease	Carbohydrate transport & metabolism
NTHI0428	68248917	xerD	site-specific tyrosine recombinase XerD	COG4974	XerD, Site-specific recombinase XerD	DNA replication, recombination, & repair
NTHI0429	68248918	---	hypothetical protein	None	None	Function unknown
NTHI0430	68248919	ruvB	Holliday junction DNA helicase B	COG2255	RuvB, Holliday junction resolvasome, helicase subunit	DNA replication, recombination, & repair
NTHI0431	68248920	ruvA	Holliday junction DNA helicase motor protein	COG0632	RuvA, Holliday junction resolvasome, DNA-binding subunit	DNA replication, recombination, & repair
NTHI0432	68248921	ruvC	Holliday junction resolvase	COG0817	RuvC, Holliday junction resolvasome, endonuclease subunit	DNA replication, recombination, & repair
NTHI0433	68248922	---	hypothetical protein	COG0217	COG0217, Uncharacterized conserved protein	Function unknown
NTHI0434	68248923	ntpA	dATP pyrophosphohydrolase	COG0494	MutT, NTP pyrophosphohydrolases including oxidative damage repair enzymes	DNA replication, recombination, & repair
NTHI0435	68248924	aspS	aspartyl-tRNA synthetase	COG0173	AspS, Aspartyl-tRNA synthetase	Translation, ribosomal structure & biogenesis
NTHI0436	68248925	---	hypothetical protein	COG1755	COG1755, Uncharacterized protein conserved in bacteria	Function unknown
NTHI0438	68248926	---	hypothetical protein	COG4106	Tam, Trans-aconitate methyltransferase	General function prediction only
NTHI0439	68248927	vagC	hypothetical protein	COG4456	VagC, Virulence-associated protein and related proteins	Function unknown
NTHI0440	68248928	vapC	predicted nucleic acid-binding protein, contains PIN domain	COG1487	VapC, Predicted nucleic acid-binding protein, contains PIN domain	General function prediction only
NTHI0441	68248929	gloA	lactoylglutathione lyase	COG0346	GloA, Lactoylglutathione lyase and related lyases	Amino acid transport & metabolism
NTHI0442	68248930	dnaQ	ribonuclease T	COG0847	DnaQ, DNA polymerase III, epsilon subunit and related 3'-5' exonucleases	DNA replication, recombination, & repair
NTHI0443	68248931	---	hypothetical protein	COG2056	COG2056, Predicted permease	General function prediction only
NTHI0444	68248932	priC	predicted primosomal replication protein N	COG3923	PriC, Primosomal replication protein N''	DNA replication, recombination, & repair
NTHI0446	68248933	efp	elongation factor P	COG0231	Efp, Translation elongation factor P (EF-P)/translation initiation factor 5A (eIF-5A)	Translation, ribosomal structure & biogenesis
NTHI0447	68248934	kamA	predicted lysine 2,3-aminomutase	COG1509	KamA, Lysine 2,3-aminomutase	Amino acid transport & metabolism
NTHI0448	68248935	oapA	opacity associated protein OapA	COG3061	OapA, Cell envelope opacity-associated protein A	Cell envelope biogenesis
NTHI0449	68248936	oapB	opacity associated protein OapB	None	None	Function unknown
NTHI0450	68248937	recO	DNA repair protein RecO	COG1381	RecO, Recombinational DNA repair protein (RecF pathway)	DNA replication, recombination, & repair
NTHI0451	68248938	rumA	23S rRNA 5-methyluridine methyltransferase	COG2265	TrmA, SAM-dependent methyltransferases related to tRNA (uracil-5-)-methyltransferase	Translation, ribosomal structure & biogenesis
NTHI0452	68248939	relA	GTP pyrophosphokinase	COG0317	SpoT, Guanosine polyphosphate pyrophosphohydrolases/synthetases	Translation, ribosomal structure & biogenesis
NTHI0453	68248940	dgkA	diacylglycerol kinase	COG0818	DgkA, Diacylglycerol kinase	Cell envelope biogenesis
NTHI0454	68248941	mogA	molybdenum cofactor biosynthesis protein	COG0521	MoaB, Molybdopterin biosynthesis enzymes	Coenzyme metabolism
NTHI0456	68248942	glnB	nitrogen regulatory protein P-II	COG0347	GlnK, Nitrogen regulatory protein PII	Amino acid transport & metabolism
NTHI0457	68248943	---	hypothetical protein	COG0628	PerM, Predicted permease	General function prediction only
NTHI0458	68248944	priA	primosome assembly protein PriA	COG1198	PriA, Primosomal protein N' (replication factor Y) - superfamily II helicase	DNA replication, recombination, & repair
NTHI0459	68248945	trmB	tRNA (guanine-N(7))-methyltransferase	COG0220	COG0220, Predicted S-adenosylmethionine-dependent methyltransferase	General function prediction only
NTHI0460	68248946	---	hypothetical protein	COG3171	COG3171, Uncharacterized protein conserved in bacteria	Function unknown
NTHI0461	68248947	napF	ferredoxin-type protein NapF	COG1142	HycB, Fe-S-cluster-containing hydrogenase components 2	Energy production & conversion
NTHI0462	68248948	napD	NapD	COG3062	NapD, Uncharacterized protein involved in formation of periplasmic nitrate reductase	Inorganic ion transport & metabolism
NTHI0463	68248949	napA	periplasmic nitrate reductase	COG0243	BisC, Anaerobic dehydrogenases, typically selenocysteine-containing	Energy production & conversion
NTHI0464	68248950	napG	quinol dehydrogenase periplasmic component	COG1145	NapF, Ferredoxin	Energy production & conversion
NTHI0465	68248951	napH	quinol dehydrogenase membrane component	COG0348	NapH, Polyferredoxin	Energy production & conversion
NTHI0466	68248952	napB	diheme cytochrome C NapB	COG3043	NapB, Nitrate reductase cytochrome c-type subunit	Energy production & conversion
NTHI0467	68248953	napC	cytochrome C-type protein NapC	COG3005	TorC, Nitrate/TMAO reductases, membrane-bound tetraheme cytochrome c subunit	Energy production & conversion
NTHI0468	68248954	adk	adenylate kinase	COG0563	Adk, Adenylate kinase and related kinases	Nucleotide transport & metabolism
NTHI0469	68248955	lic3C	putative integral membrane signal transducer protein	None	None	Function unknown
NTHI0471	68248956	galE	UDP-glucose 4-epimerase	COG1087	GalE, UDP-glucose 4-epimerase	Cell envelope biogenesis
NTHI0472	68248957	lic3A	CMP-Neu5Ac--lipooligosaccharide alpha 2-3 sialyltransferase	None	Transferase activity, transferring glycosyl groups	Cell envelope biogenesis
NTHI0473	68248958	tauB	putative ABC-type nitrate/sulfonate/bicarbonate transport system, ATPase component	COG1116	TauB, ABC-type nitrate/sulfonate/bicarbonate transport system, ATPase component	Inorganic ion transport & metabolism
NTHI0474	68248959	tauC	putative ABC-type nitrate/sulfonate/bicarbonate transport system, permease component	COG0600	TauC, ABC-type nitrate/sulfonate/bicarbonate transport system, permease component	Inorganic ion transport & metabolism
NTHI0475	68248960	tauA	putative ABC-type nitrate/sulfonate/bicarbonate transport systems, periplasmic component	COG0715	TauA, ABC-type nitrate/sulfonate/bicarbonate transport systems, periplasmic components	Inorganic ion transport & metabolism
NTHI0476	68248961	tenA	putative transcription activator	COG0819	TenA, Putative transcription activator	Transcription
NTHI0477	68248962	hfeD	putative ABC-type chelated iron transport system, permease component	COG1108	ZnuB, ABC-type Mn2+/Zn2+ transport systems, permease components	Inorganic ion transport & metabolism
NTHI0478	68248963	hfeC	putative ABC-type chelated iron transport system, permease component	COG1108	ZnuB, ABC-type Mn2+/Zn2+ transport systems, permease components	Inorganic ion transport & metabolism
NTHI0479	68248964	hfeB	putative ABC-type chelated iron transport system, ATPase component	COG1121	ZnuC, ABC-type Mn/Zn transport systems, ATPase component	Inorganic ion transport & metabolism
NTHI0481	68248965	hfeA	putative periplasmic chelated iron binding protein	COG0803	LraI, ABC-type metal ion transport system, periplasmic component/surface adhesin	Inorganic ion transport & metabolism
NTHI0482	68248966	---	hypothetical protein	None	None	Function unknown
NTHI0483	68248967	pbpG	penicillin-binding protein 7 homolog precursor	COG1686	DacC, D-alanyl-D-alanine carboxypeptidase	Cell envelope biogenesis
NTHI0485	68248968	---	hypothetical protein	COG0820	COG0820, Predicted Fe-S-cluster redox enzyme	General function prediction only
NTHI0486	68248969	pilF	hypothetical protein	COG3063	PilF, Tfp pilus assembly protein PilF	Cell motility & secretion; Intracellular trafficking & secretion
NTHI0487	68248970	---	conserved hypothetical transcriptional regulator with an N-terminal xre-type HTH domain	COG1426	COG1426, Uncharacterized protein conserved in bacteria	Function unknown
NTHI0488	68248971	ispG	4-hydroxy-3-methylbut-2-en-1-yl diphosphate synthase	COG0821	GcpE, Enzyme involved in the deoxyxylulose pathway of isoprenoid biosynthesis	Lipid metabolism
NTHI0489	68248972	hisS	histidyl-tRNA synthetase	COG0124	HisS, Histidyl-tRNA synthetase	Translation, ribosomal structure & biogenesis
NTHI0490	68248973	---	hypothetical protein	COG2976	COG2976, Uncharacterized protein conserved in bacteria	Function unknown
NTHI0491	68248974	---	hypothetical protein	COG2975	COG2975, Uncharacterized protein conserved in bacteria	Function unknown
NTHI0492	68248975	fdx	ferredoxin, 2Fe-2S	COG0633	Fdx, Ferredoxin	Energy production & conversion
NTHI0493	68248976	hscA	chaperone protein HscA	COG0443	DnaK, Molecular chaperone	Posttranslational modification, protein turnover, chaperones
NTHI0494	68248977	---	hypothetical protein	None	None	Function unknown
NTHI0495	68248978	hscB	co-chaperone HscB	COG1076	DjlA, DnaJ-domain-containing proteins 1	Posttranslational modification, protein turnover, chaperones
NTHI0496	68248979	---	hypothetical protein	COG0316	IscA, Uncharacterized conserved protein	Function unknown
NTHI0497	68248980	nifU	scaffold protein	COG0822	IscU, NifU homolog involved in Fe-S cluster formation	Energy production & conversion
NTHI0498	68248981	nifS2	cysteine desulfurase	COG1104	NifS, Cysteine sulfinate desulfinase/cysteine desulfurase and related enzymes	Amino acid transport & metabolism
NTHI0499	68248982	---	predicted transcriptional regulator	COG1959	COG1959, Predicted transcriptional regulator	Transcription
NTHI0500	68248983	lasT	hypothetical tRNA/rRNA methyltransferase	COG0565	LasT, rRNA methylase	Translation, ribosomal structure & biogenesis
NTHI0501	68248984	pal	outer membrane protein P6 precursor	COG2885	OmpA, Outer membrane protein and related peptidoglycan-associated (lipo)proteins	Cell envelope biogenesis
NTHI0502	68248985	tolB	translocation protein TolB	COG0823	TolB, Periplasmic component of the Tol biopolymer transport system	Intracellular trafficking & secretion
NTHI0503	68248986	tolA	cell envelope integrity inner membrane protein TolA	COG3064	TolA, Membrane protein involved in colicin uptake	Cell envelope biogenesis
NTHI0504	68248987	tolR	colicin uptake protein TolR	COG0848	ExbD, Biopolymer transport protein	Intracellular trafficking & secretion
NTHI0505	68248988	tolQ	TolQ	COG0811	TolQ, Biopolymer transport proteins	Intracellular trafficking & secretion
NTHI0506	68248989	fcbC	predicted thioesterase	COG0824	FcbC, Predicted thioesterase	General function prediction only
NTHI0507	68248990	dinG	probable ATP-dependent helicase	COG1199	DinG, Rad3-related DNA helicases	Translation, ribosomal structure & biogenesis
NTHI0508	68248991	---	hypothetical protein	COG1214	COG1214, Inactive homolog of metal-dependent proteases, putative molecular chaperone	Posttranslational modification, protein turnover, chaperones
NTHI0509	68248992	slp	possible starvation-inducible outer membrane lipoprotein	COG3065	Slp, Starvation-inducible outer membrane lipoprotein	Cell envelope biogenesis
NTHI0510	68248993	lcfA	long-chain-fatty-acid--CoA ligase	COG0318	CaiC, Acyl-CoA synthetases (AMP-forming)/AMP-acid ligases II	Lipid metabolism; Secondary metabolite biosynthesis, transport, & catabolism
NTHI0511	68248994	rnd	ribonuclease D	COG0349	Rnd, Ribonuclease D	Translation, ribosomal structure & biogenesis
NTHI0512	68248995	---	conserved hypothetical acyltransferase	COG1835	COG1835, Predicted acyltransferases	Lipid metabolism
NTHI0513	68248996	---	translation-associated GTPase	COG0012	COG0012, Predicted GTPase, probable translation factor	Translation, ribosomal structure & biogenesis
NTHI0514	68248997	pth	peptidyl-tRNA hydrolase	COG0193	Pth, Peptidyl-tRNA hydrolase	Translation, ribosomal structure & biogenesis
NTHI0516	68248998	---	hypothetical protein	COG2914	COG2914, Uncharacterized protein conserved in bacteria	Function unknown
NTHI0517	68248999	---	conserved hypothetical cupin superfamily metalloenzyme	COG2850	COG2850, Uncharacterized conserved protein	Function unknown
NTHI0518	68249000	xseA	exodeoxyribonuclease VII large subunit	COG1570	XseA, Exonuclease VII, large subunit	DNA replication, recombination, & repair
NTHI0519	68249001	adpP	ADP-ribose pyrophosphatase	COG0494	MutT, NTP pyrophosphohydrolases including oxidative damage repair enzymes	DNA replication, recombination, & repair
NTHI0520	68249002	icc	cyclic 3',5'-adenosine monophosphate phosphodiesterase	COG1409	Icc, Predicted phosphohydrolases	General function prediction only
NTHI0521	68249003	---	hypothetical protein	COG3691	COG3691, Uncharacterized protein conserved in bacteria	Function unknown
NTHI0522	68249004	ompP1	Outer membrane protein P1 precursor	COG2067	FadL, Long-chain fatty acid transport protein	Lipid metabolism
NTHI0523	68249005	ogt	methylated-DNA--protein-cysteine methyltransferase	COG0350	Ada, Methylated DNA-protein cysteine methyltransferase	DNA replication, recombination, & repair
NTHI0524	68249006	mutH	DNA mismatch repair protein	COG3066	MutH, DNA mismatch repair protein	DNA replication, recombination, & repair
NTHI0525	68249007	mesJ	putative cell cycle protein MesJ	COG0037	MesJ, Predicted ATPase of the PP-loop superfamily implicated in cell cycle control	Cell division & chromosome partitioning
NTHI0528	68249008	accA	acetyl-CoA carboxylase carboxyltransferase subunit alpha	COG0825	AccA, Acetyl-CoA carboxylase alpha subunit	Lipid metabolism
NTHI0529	68249009	znuB	high-affinity zinc uptake system membrane protein ZnuB	COG1108	ZnuB, ABC-type Mn2+/Zn2+ transport systems, permease components	Inorganic ion transport & metabolism
NTHI0531	68249010	znuC	high-affinity zinc uptake system ATP-binding protein ZnuC	COG1121	ZnuC, ABC-type Mn/Zn transport systems, ATPase component	Inorganic ion transport & metabolism
NTHI0532	68249011	nlpD	conserved hypothetical metalloprotease	COG0739	NlpD, Membrane proteins related to metalloendopeptidases	Cell envelope biogenesis
NTHI0534	68249012	tyrR	transcriptional regulatory protein TyrR	COG3283	TyrR, Transcriptional regulator of aromatic amino acids metabolism	Transcription; Amino acid transport & metabolism
NTHI0535	68249013	hfq	RNA-binding protein Hfq	COG1923	Hfq, Uncharacterized host factor I protein	General function prediction only
NTHI0536	68249014	rluC	23S rRNA pseudouridylate synthase C	COG0564	RluA, Pseudouridylate synthases, 23S RNA-specific	Translation, ribosomal structure & biogenesis
NTHI0538	68249015	rne	ribonuclease E	COG1530	CafA, Ribonucleases G and E	Translation, ribosomal structure & biogenesis
NTHI0539	68249016	---	hypothetical protein	COG3637	COG3637, Opacity protein and related surface antigens	Cell envelope biogenesis
NTHI0540	68249017	thiM	hydroxyethylthiazole kinase	COG2145	ThiM, Hydroxyethylthiazole kinase, sugar kinase family	Coenzyme metabolism
NTHI0541	68249018	thiD	phosphomethylpyrimidine kinase	COG0351	ThiD, Hydroxymethylpyrimidine/phosphomethylpyrimidine kinase	Coenzyme metabolism
NTHI0542	68249019	thiE	thiamine-phosphate pyrophosphorylase	COG0352	ThiE, Thiamine monophosphate synthase	Coenzyme metabolism
NTHI0543	68249020	araJ	conserved hypothetical metabolite transport protein	COG2814	AraJ, Arabinose efflux permease	Carbohydrate transport & metabolism
NTHI0544	68249021	---	hypothetical protein	None	None	Function unknown
NTHI0545	68249022	---	putative protease	COG0826	COG0826, Collagenase and related proteases	Posttranslational modification, protein turnover, chaperones
NTHI0546	68249023	srmB	ATP-dependent RNA helicase SrmB	COG0513	SrmB, Superfamily II DNA and RNA helicases	DNA replication, recombination, & repair; Transcription; Translation, ribosomal structure & biogenesis
NTHI0547	68249024	---	predicted O-methyltransferase	COG4123	COG4123, Predicted O-methyltransferase	General function prediction only
NTHI0549	68249025	pssA	phosphatidylserine synthase	COG1502	Cls, Phosphatidylserine/phosphatidylglycerophosphate/cardioli pin synthases and related enzymes	Lipid metabolism
NTHI0550	68249026	fadR	fatty acid metabolism regulator	COG2186	FadR, Transcriptional regulators	Transcription
NTHI0551	68249027	nhaB	sodium/proton antiporter	COG3067	NhaB, Na+/H+ antiporter	Inorganic ion transport & metabolism
NTHI0552	68249028	dsbB	disulfide bond formation protein B	COG1495	DsbB, Disulfide bond formation protein DsbB	Posttranslational modification, protein turnover, chaperones
NTHI0553	68249029	glmS	D-fructose-6-phosphate amidotransferase	COG0449	GlmS, Glucosamine 6-phosphate synthetase, contains amidotransferase and phosphosugar isomerase domains	Cell envelope biogenesis
NTHI0554	68249030	hupA	DNA-binding protein HU	COG0776	HimA, Bacterial nucleoid DNA-binding protein	DNA replication, recombination, & repair
NTHI0555	68249031	---	hypothetical protein	COG3068	COG3068, Uncharacterized protein conserved in bacteria	Function unknown
NTHI0557	68249032	nudC	NADH pyrophosphatase	COG2816	NPY1, NTP pyrophosphohydrolases containing a Zn-finger, probably nucleic-acid-binding	DNA replication, recombination, & repair
NTHI0558	68249033	orfG	predicted gluconate transport-associated protein	COG0694	COG0694, Thioredoxin-like proteins and domains	Posttranslational modification, protein turnover, chaperones
NTHI0559	68249034	comF	competence protein F	COG1040	ComFC, Predicted amidophosphoribosyltransferases	General function prediction only
NTHI0560	68249035	comE	competence protein E	COG4796	HofQ, Type II secretory pathway, component HofQ	Intracellular trafficking & secretion
NTHI0562	68249036	comD	competence protein D	None	None	Cell motility & secretion
NTHI0563	68249037	comC	competence protein C	None	None	Cell motility & secretion
NTHI0564	68249038	comB	competence protein B	None	None	Cell motility & secretion
NTHI0566	68249039	comA	competence protein A	COG4972	PilM, Tfp pilus assembly protein, ATPase PilM	Cell motility & secretion; Intracellular trafficking & secretion
NTHI0567	68249040	mrcA	penicillin-binding protein 1A	COG5009	MrcA, Membrane carboxypeptidase/penicillin-binding protein	Cell envelope biogenesis
NTHI0568	68249041	comJ	hypothetical protein	COG2961	ComJ, Protein involved in catabolism of external DNA	General function prediction only
NTHI0569	68249042	---	hypothetical protein	COG0718	COG0718, Uncharacterized protein conserved in bacteria	Function unknown
NTHI0570	68249043	recR	recombination protein RecR	COG0353	RecR, Recombinational DNA repair protein (RecF pathway)	DNA replication, recombination, & repair
NTHI0571	68249044	topB	DNA topoisomerase III	COG0550	TopA, Topoisomerase IA	DNA replication, recombination, & repair
NTHI0572	68249045	secG	preprotein translocase subunit SecG	COG1314	SecG, Preprotein translocase subunit SecG	Intracellular trafficking & secretion
NTHI0573	68249046	fruA	PTS system, fructose-specific IIBC component	COG1299	FruA, Phosphotransferase system, fructose-specific IIC component	Carbohydrate transport & metabolism
NTHI0574	68249047	fruK	1-phosphofructokinase	COG1105	FruK, Fructose-1-phosphate kinase and related fructose-6-phosphate kinase (PfkB)	Carbohydrate transport & metabolism
NTHI0575	68249048	fruB	fructose-specific PTS IIA/HPr components	COG4668	MtlA, Mannitol/fructose-specific phosphotransferase system, IIA domain	Carbohydrate transport & metabolism
NTHI0576	68249049	---	hypothetical protein	None	None	Function unknown
NTHI0577	68249050	vapD	virulence-associated protein D	COG3309	VapD, Uncharacterized virulence-associated protein D	Function unknown
NTHI0578	68249051	vapX	hypothetical protein	None	None	Function unknown
NTHI0579	68249052	tlyC	hypothetical protein	COG1253	TlyC, Hemolysins and related proteins containing CBS domains	General function prediction only
NTHI0580	68249053	---	hypothetical protein	None	None	Function unknown
NTHI0581	68249054	tatD	putative deoxyribonuclease	COG0084	TatD, Mg-dependent DNase	DNA replication, recombination, & repair
NTHI0582	68249055	holB	DNA polymerase III subunit delta'	COG0470	HolB, ATPase involved in DNA replication	DNA replication, recombination, & repair
NTHI0584	68249056	---	hypothetical protein	None	None	Function unknown
NTHI0585	68249057	lav	autotransported protein Lav	COG3468	AidA, Type V secretory pathway, adhesin AidA	Cell envelope biogenesis; Intracellular trafficking & secretion
NTHI0586	68249058	tdk	thymidylate kinase	COG0125	Tmk, Thymidylate kinase	Nucleotide transport & metabolism
NTHI0587	68249059	---	predicted periplasmic solute-binding protein	COG1559	COG1559, Predicted periplasmic solute-binding protein	General function prediction only
NTHI0588	68249060	surA	survival protein SurA homolog	COG0760	SurA, Parvulin-like peptidyl-prolyl isomerase	Posttranslational modification, protein turnover, chaperones
NTHI0589	68249061	pyrR	pyrimidine regulatory protein PyrR	COG2065	PyrR, Pyrimidine operon attenuation protein/uracil phosphoribosyltransferase	Nucleotide transport & metabolism
NTHI0591	68249062	mazG	nucleoside triphosphate pyrophosphohydrolase	COG3956	COG3956, Protein containing tetrapyrrole methyltransferase domain and MazG-like (predicted pyrophosphatase) domain	General function prediction only
NTHI0592	68249063	virK	hypothetical protein	COG2990	VirK, Uncharacterized protein conserved in bacteria	Function unknown
NTHI0593	68249064	lon	ATP-dependent protease La	COG0466	Lon, ATP-dependent Lon protease, bacterial type	Posttranslational modification, protein turnover, chaperones
NTHI0594	68249065	hemN	coproporphyrinogen III oxidase	COG0635	HemN, Coproporphyrinogen III oxidase and related Fe-S oxidoreductases	Coenzyme metabolism
NTHI0595	68249066	rpiA	ribose-5-phosphate isomerase A	COG0120	RpiA, Ribose 5-phosphate isomerase	Carbohydrate transport & metabolism
NTHI0596	68249067	serA	D-3-phosphoglycerate dehydrogenase	COG0111	SerA, Phosphoglycerate dehydrogenase and related dehydrogenases	Amino acid transport & metabolism
NTHI0597	68249068	---	predicted aminomethyltransferase related to GcvT	COG0354	COG0354, Predicted aminomethyltransferase related to GcvT	General function prediction only
NTHI0598	68249069	---	hypothetical protein	COG1561	COG1561, Uncharacterized stress-induced protein	Function unknown
NTHI0599	68249070	hisG	ATP phosphoribosyltransferase	COG0040	HisG, ATP phosphoribosyltransferase	Amino acid transport & metabolism
NTHI0600	68249071	hisD	histidinol dehydrogenase	COG0141	HisD, Histidinol dehydrogenase	Amino acid transport & metabolism
NTHI0601	68249072	hisC	histidinol-phosphate aminotransferase	COG0079	HisC, Histidinol-phosphate/aromatic aminotransferase and cobyric acid decarboxylase	Amino acid transport & metabolism
NTHI0602	68249073	hisB	imidazole glycerol-phosphate dehydratase/histidinol phosphatase	COG0131	HisB, Imidazoleglycerol-phosphate dehydratase	Amino acid transport & metabolism
NTHI0603	68249074	hisH	imidazole glycerol phosphate synthase subunit HisH	COG0118	HisH, Glutamine amidotransferase	Amino acid transport & metabolism
NTHI0604	68249075	hisA	1-(5-phosphoribosyl)-5-[(5-phosphoribosylamino)methylideneamino] imidazole-4-carboxamide isomerase	COG0106	HisA, Phosphoribosylformimino-5-aminoimidazole carboxamide ribonucleotide (ProFAR) isomerase	Amino acid transport & metabolism
NTHI0605	68249076	hisF	imidazole glycerol phosphate synthase subunit HisF	COG0107	HisF, Imidazoleglycerol-phosphate synthase	Amino acid transport & metabolism
NTHI0606	68249077	hisI	histidine biosynthesis bifunctional protein HisIE	COG0139	HisI, Phosphoribosyl-AMP cyclohydrolase	Amino acid transport & metabolism
NTHI0606_1	68249078	---	hypothetical protein	None	None	Function unknown
NTHI0607	68249079	tyrP	tyrosine-specific transport protein 1	COG0814	SdaC, Amino acid permeases	Amino acid transport & metabolism
NTHI0608	68249080	atpC	F0F1 ATP synthase subunit epsilon	COG0355	AtpC, F0F1-type ATP synthase, epsilon subunit (mitochondrial delta subunit)	Energy production & conversion
NTHI0609	68249081	atpD	F0F1 ATP synthase subunit beta	COG0055	AtpD, F0F1-type ATP synthase, beta subunit	Energy production & conversion
NTHI0610	68249082	atpG	F0F1 ATP synthase subunit gamma	COG0224	AtpG, F0F1-type ATP synthase, gamma subunit	Energy production & conversion
NTHI0611	68249083	atpA	F0F1 ATP synthase subunit alpha	COG0056	AtpA, F0F1-type ATP synthase, alpha subunit	Energy production & conversion
NTHI0612	68249084	atpH	F0F1 ATP synthase subunit delta	COG0712	AtpH, F0F1-type ATP synthase, delta subunit (mitochondrial oligomycin sensitivity protein)	Energy production & conversion
NTHI0613	68249085	atpF	F0F1 ATP synthase subunit B	COG0711	AtpF, F0F1-type ATP synthase, subunit b	Energy production & conversion
NTHI0614	68249086	atpE	F0F1 ATP synthase subunit C	COG0636	AtpE, F0F1-type ATP synthase, subunit c/Archaeal/vacuolar-type H+-ATPase, subunit K	Energy production & conversion
NTHI0615	68249087	atpB	F0F1 ATP synthase subunit A	COG0356	AtpB, F0F1-type ATP synthase, subunit a	Energy production & conversion
NTHI0616	68249088	atpI	F0F1 ATP synthase subunit I	COG3312	AtpI, F0F1-type ATP synthase, subunit I	Energy production & conversion
NTHI0617	68249089	gidB	glucose-inhibited division protein B	COG0357	GidB, Predicted S-adenosylmethionine-dependent methyltransferase involved in bacterial cell division	Cell envelope biogenesis
NTHI0618	68249090	---	hypothetical protein	None	None	Function unknown
NTHI0619	68249091	---	predicted phosphatase/phosphohexomutase	COG0637	COG0637, Predicted phosphatase/phosphohexomutase	General function prediction only
NTHI0620	68249092	---	predicted membrane protein	COG1238	COG1238, Predicted membrane protein	Function unknown
NTHI0621	68249093	luxS	S-ribosylhomocysteinase	COG1854	LuxS, LuxS protein involved in autoinducer AI2 synthesis	Signal transduction
NTHI0623	68249094	aphA	acid phosphatase/phosphotransferase	COG3700	AphA, Acid phosphatase (class B)	General function prediction only
NTHI0624	68249095	hslV	ATP-dependent protease peptidase subunit	COG5405	HslV, ATP-dependent protease HslVU (ClpYQ), peptidase subunit	Posttranslational modification, protein turnover, chaperones
NTHI0625	68249096	hslU	ATP-dependent protease ATP-binding subunit	COG1220	HslU, ATP-dependent protease HslVU (ClpYQ), ATPase subunit	Posttranslational modification, protein turnover, chaperones
NTHI0626	68249097	potD2	spermidine/putrescine-binding periplasmic protein 2 precursor	COG0687	PotD, Spermidine/putrescine-binding periplasmic protein	Amino acid transport & metabolism
NTHI0627	68249098	ordL	probable oxidoreductase OrdL	COG0665	DadA, Glycine/D-amino acid oxidases (deaminating)	Amino acid transport & metabolism
NTHI0628	68249099	rmuC	DNA recombination protein RmuC	COG1322	COG1322, Uncharacterized protein conserved in bacteria	Function unknown
NTHI0629	68249100	rbsD	Ribose transport permease protein	COG1869	RbsD, ABC-type ribose transport system, auxiliary component	Carbohydrate transport & metabolism
NTHI0630	68249101	rbsA	D-ribose transporter ATP binding protein	COG1129	MglA, ABC-type sugar transport system, ATPase component	Carbohydrate transport & metabolism
NTHI0631	68249102	rbsC	ribose ABC transporter permease protein	COG1172	AraH, Ribose/xylose/arabinose/galactoside ABC-type transport systems, permease components	Carbohydrate transport & metabolism
NTHI0632	68249103	rbsB	D-ribose transporter subunit RbsB	COG1879	RbsB, ABC-type sugar transport system, periplasmic component	Carbohydrate transport & metabolism
NTHI0633	68249104	rbsK	ribokinase	COG0524	RbsK, Sugar kinases, ribokinase family	Carbohydrate transport & metabolism
NTHI0634	68249105	rbsR	Ribose operon repressor	COG1609	PurR, Transcriptional regulators	Transcription
NTHI0635	68249106	---	hypothetical protein	COG2862	COG2862, Predicted membrane protein	Function unknown
NTHI0636	68249107	menG	ribonuclease activity regulator protein RraA	COG0684	MenG, Demethylmenaquinone methyltransferase	Coenzyme metabolism
NTHI0637	68249108	menA	1,4-dihydroxy-2-naphthoate octaprenyltransferase	COG1575	MenA, 1,4-dihydroxy-2-naphthoate octaprenyltransferase	Coenzyme metabolism
NTHI0638	68249109	---	hypothetical protein	COG1720	COG1720, Uncharacterized conserved protein	Function unknown
NTHI0639	68249110	tehA	potassium-tellurite ethidium and proflavin transporter	COG1275	TehA, Tellurite resistance protein and related permeases	Inorganic ion transport & metabolism
NTHI0640	68249111	rpoC	DNA-directed RNA polymerase subunit beta'	COG0086	RpoC, DNA-directed RNA polymerase, beta' subunit/160 kD subunit	Transcription
NTHI0641	68249112	rpoB	DNA-directed RNA polymerase subunit beta	COG0085	RpoB, DNA-directed RNA polymerase, beta subunit/140 kD subunit	Transcription
NTHI0642	68249113	rplA	50S ribosomal protein L1	COG0081	RplA, Ribosomal protein L1	Translation, ribosomal structure & biogenesis
NTHI0643	68249114	rplK	50S ribosomal protein L11	COG0080	RplK, Ribosomal protein L11	Translation, ribosomal structure & biogenesis
NTHI0644	68249115	deoD	purine nucleoside phosphorylase	COG0813	DeoD, Purine-nucleoside phosphorylase	Nucleotide transport & metabolism
NTHI0645	68249116	nupC	predicted nucleoside permease	COG1972	NupC, Nucleoside permease	Nucleotide transport & metabolism
NTHI0646	68249117	pflA	predicted pyruvate-formate lyase-activating enzyme	COG1180	PflA, Pyruvate-formate lyase-activating enzyme	Posttranslational modification, protein turnover, chaperones
NTHI0647	68249118	pflD	hypothetical protein	COG1882	PflD, Pyruvate-formate lyase	Energy production & conversion
NTHI0648	68249119	---	predicted membrane protein	COG2364	COG2364, Predicted membrane protein	Function unknown
NTHI0649	68249120	waaQ	ADP-heptose--lipooligosaccharide heptosyltransferase III	COG0859	RfaF, ADP-heptose:LPS heptosyltransferase	Cell envelope biogenesis
NTHI0650	68249121	fba	fructose-bisphosphate aldolase	COG0191	Fba, Fructose/tagatose bisphosphate aldolase	Carbohydrate transport & metabolism
NTHI0651	68249122	pgk	phosphoglycerate kinase	COG0126	Pgk, 3-phosphoglycerate kinase	Carbohydrate transport & metabolism
NTHI0652	68249123	---	probable ribonuclease I	COG3719	Rna, Ribonuclease I	Translation, ribosomal structure & biogenesis
NTHI0653	68249124	---	putative ferredoxin-like protein	COG4231	COG4231, Indolepyruvate ferredoxin oxidoreductase, alpha and beta subunits	Energy production & conversion
NTHI0654	68249125	tyrQ	tyrosine-specific transport protein 2	COG0814	SdaC, Amino acid permeases	Amino acid transport & metabolism
NTHI0655	68249126	tdk	thymidine kinase	COG1435	Tdk, Thymidine kinase	Nucleotide transport & metabolism
NTHI0656	68249127	gcp	O-sialoglycoprotein endopeptidase	COG0533	QRI7, Metal-dependent proteases with possible chaperone activity	Posttranslational modification, protein turnover, chaperones
NTHI0657	68249128	rpsU	30S ribosomal protein S21	COG0828	RpsU, Ribosomal protein S21	Translation, ribosomal structure & biogenesis
NTHI0658	68249129	dnaG	DNA primase	COG0358	DnaG, DNA primase (bacterial type)	DNA replication, recombination, & repair
NTHI0659	68249130	rpoD	RNA polymerase sigma factor RpoD	COG0568	RpoD, DNA-directed RNA polymerase, sigma subunit (sigma70/sigma32)	Transcription
NTHI0660	68249131	aspA	aspartate ammonia-lyase	COG1027	AspA, Aspartate ammonia-lyase	Amino acid transport & metabolism
NTHI0661	68249132	ureH	urease accessory protein UreH	COG0829	UreH, Urease accessory protein UreH	Posttranslational modification, protein turnover, chaperones
NTHI0662	68249133	ureG	urease accessory protein UreG	COG0378	HypB, Ni2+-binding GTPase involved in regulation of expression and maturation of urease and hydrogenase	Posttranslational modification, protein turnover, chaperones; Transcription
NTHI0663	68249134	ureF	urease accessory protein UreF	COG0830	UreF, Urease accessory protein UreF	Posttranslational modification, protein turnover, chaperones
NTHI0664	68249135	ureE	urease accessory protein UreE	COG2371	UreE, Urease accessory protein UreE	Posttranslational modification, protein turnover, chaperones
NTHI0665	68249136	ureC	urease subunit alpha	COG0804	UreC, Urea amidohydrolase (urease) alpha subunit	Amino acid transport & metabolism
NTHI0666	68249137	ureB	urease subunit beta	COG0832	UreB, Urea amidohydrolase (urease) beta subunit	Amino acid transport & metabolism
NTHI0667	68249138	ureA	urease subunit gamma	COG0831	UreA, Urea amidohydrolase (urease) gamma subunit	Amino acid transport & metabolism
NTHI0668	68249139	groES	co-chaperonin GroES	COG0234	GroS, Co-chaperonin GroES (HSP10)	Posttranslational modification, protein turnover, chaperones
NTHI0669	68249140	groEL	chaperonin GroEL	COG0459	GroL, Chaperonin GroEL (HSP60 family)	Posttranslational modification, protein turnover, chaperones
NTHI0670	68249141	rplI	50S ribosomal protein L9	COG0359	RplI, Ribosomal protein L9	Translation, ribosomal structure & biogenesis
NTHI0671	68249142	rpsR	30S ribosomal protein S18	COG0238	RpsR, Ribosomal protein S18	Translation, ribosomal structure & biogenesis
NTHI0672	68249143	priB	primosomal replication protein N	COG2965	PriB, Primosomal replication protein N	DNA replication, recombination, & repair
NTHI0673	68249144	rpsF	30S ribosomal protein S6	COG0360	RpsF, Ribosomal protein S6	Translation, ribosomal structure & biogenesis
NTHI0674	68249145	infA	translation initiation factor IF-1	COG0361	InfA, Translation initiation factor 1 (IF-1)	Translation, ribosomal structure & biogenesis
NTHI0676	68249146	ksgA	dimethyladenosine transferase	COG0030	KsgA, Dimethyladenosine transferase (rRNA methylation)	Translation, ribosomal structure & biogenesis
NTHI0677	68249147	lic2A	UDP-Gal--lipooligosaccharide galactosyltransferase	COG3306	COG3306, Glycosyltransferase involved in LPS biosynthesis	Cell envelope biogenesis
NTHI0679	68249148	apaH	diadenosine tetraphosphatase	COG0639	ApaH, Diadenosine tetraphosphatase and related serine/threonine protein phosphatases	Signal transduction
NTHI0680	68249149	---	hypothetical protein	None	None	Function unknown
NTHI0681	68249150	gnd	6-phosphogluconate dehydrogenase	COG0362	Gnd, 6-phosphogluconate dehydrogenase	Carbohydrate transport & metabolism
NTHI0683	68249151	---	hypothetical protein	COG1943	COG1943, Transposase and inactivated derivatives	DNA replication, recombination, & repair
NTHI0684	68249152	---	hypothetical protein	COG3759	COG3759, Predicted membrane protein	Function unknown
NTHI0685	162000000	devB	6-phosphogluconolactonase	COG0363	NagB, 6-phosphogluconolactonase/Glucosamine-6-phosphate isomerase/deaminase	Carbohydrate transport & metabolism
NTHI0686	68249154	zwf	glucose-6-phosphate 1-dehydrogenase	COG0364	Zwf, Glucose-6-phosphate 1-dehydrogenase	Carbohydrate transport & metabolism
NTHI0687	68249155	cysQ	CysQ	COG1218	CysQ, 3'-Phosphoadenosine 5'-phosphosulfate (PAPS) 3'-phosphatase	Inorganic ion transport & metabolism
NTHI0688	68249156	---	hypothetical protein	None	None	Function unknown
NTHI0689	68249157	---	predicted membrane protein	COG1297	COG1297, Predicted membrane protein	Function unknown
NTHI0690	68249158	hslR	heat shock protein 15 homolog	COG1188	COG1188, Ribosome-associated heat shock protein implicated in the recycling of the 50S subunit (S4 paralog)	Translation, ribosomal structure & biogenesis
NTHI0691	68249159	asnC	DNA-binding transcriptional regulator AsnC	COG1522	Lrp, Transcriptional regulators	Transcription
NTHI0692	68249160	asnA	asparagine synthetase AsnA	COG2502	AsnA, Asparagine synthetase A	Amino acid transport & metabolism
NTHI0693	68249161	---	conserved hypothetical transposase-like protein	COG2801	Tra5, Transposase and inactivated derivatives	DNA replication, recombination, & repair
NTHI0694	68249162	---	hypothetical protein	None	None	Function unknown
NTHI0695	68249163	---	hypothetical protein	None	None	Function unknown
NTHI0696	68249164	---	hypothetical protein	None	None	Function unknown
NTHI0697	68249165	gph	phosphoglycolate phosphatase	COG0546	Gph, Predicted phosphatases	General function prediction only
NTHI0698	68249166	rpe	ribulose-phosphate 3-epimerase	COG0036	Rpe, Pentose-5-phosphate-3-epimerase	Carbohydrate transport & metabolism
NTHI0699	68249167	gyrB	DNA gyrase subunit B	COG0187	GyrB, Type IIA topoisomerase (DNA gyrase/topo II, topoisomerase IV), B subunit	DNA replication, recombination, & repair
NTHI0701	68249168	tex	predicted transcriptional accessory protein	COG2183	Tex, Transcriptional accessory protein	Transcription
NTHI0702	68249169	greB	transcription elongation factor GreB	COG0782	GreA, Transcription elongation factor	Transcription
NTHI0703	68249170	acrR	DNA-binding transcriptional repressor FabR	COG1309	AcrR, Transcriptional regulator	Transcription
NTHI0704	68249171	oxyR	DNA-binding transcriptional regulator OxyR	COG0583	LysR, Transcriptional regulator	Transcription
NTHI0705	68249172	pdgX	peroxiredoxin/glutaredoxin	COG0678	AHP1, Peroxiredoxin	Posttranslational modification, protein turnover, chaperones
NTHI0706	68249173	slyX	hypothetical protein	COG2900	SlyX, Uncharacterized protein conserved in bacteria	Function unknown
NTHI0707	68249174	fkbY	probable FKBP-type peptidyl-prolyl cis-trans isomerase	COG0545	FkpA, FKBP-type peptidyl-prolyl cis-trans isomerases 1	Posttranslational modification, protein turnover, chaperones
NTHI0708	68249175	---	hypothetical protein	COG2964	COG2964, Uncharacterized protein conserved in bacteria	Function unknown
NTHI0709	68249176	dsrE	hypothetical protein	COG1553	DsrE, Uncharacterized conserved protein involved in intracellular sulfur reduction	Inorganic ion transport & metabolism
NTHI0710	68249177	dsrF	hypothetical protein	COG2923	DsrF, Uncharacterized protein involved in the oxidation of intracellular sulfur	Inorganic ion transport & metabolism
NTHI0711	68249178	dsrH	uncharacterized conserved protein involved in oxidation of intracellular sulfur	COG2168	DsrH, Uncharacterized conserved protein involved in oxidation of intracellular sulfur	Inorganic ion transport & metabolism
NTHI0712	68249179	tufB	elongation factor Tu	COG0050	TufB, GTPases - translation elongation factors	Translation, ribosomal structure & biogenesis
NTHI0713	68249180	coaA	pantothenate kinase	COG1072	CoaA, Panthothenate kinase	Coenzyme metabolism
NTHI0716	68249181	rseB	periplasmic negative regulator of sigmaE	COG3026	RseB, Negative regulator of sigma E activity	Signal transduction
NTHI0718	68249182	rseA	sigma-E factor negative regulatory protein homolog	COG3073	RseA, Negative regulator of sigma E activity	Signal transduction
NTHI0719	68249183	rpoE	RNA polymerase sigma factor RpoE	COG1595	RpoE, DNA-directed RNA polymerase specialized sigma subunit, sigma24 homolog	Transcription
NTHI0720	68249184	---	hypothetical protein	COG2938	COG2938, Uncharacterized conserved protein	Function unknown
NTHI0721	68249185	mscL	large-conductance mechanosensitive channel	COG1970	MscL, Large-conductance mechanosensitive channel	Cell envelope biogenesis
NTHI0722	68249186	trkA	potassium transporter peripheral membrane component	COG0569	TrkA, K+ transport systems, NAD-binding component	Inorganic ion transport & metabolism
NTHI0723	68249187	sun	SUN protein	COG0144	Sun, tRNA and rRNA cytosine-C5-methylases	Translation, ribosomal structure & biogenesis
NTHI0724	68249188	fmt	methionyl-tRNA formyltransferase	COG0223	Fmt, Methionyl-tRNA formyltransferase	Translation, ribosomal structure & biogenesis
NTHI0725	68249189	def	peptide deformylase	COG0242	Def, N-formylmethionyl-tRNA deformylase	Translation, ribosomal structure & biogenesis
NTHI0726	68249190	---	hypothetical protein	None	None	Function unknown
NTHI0727	68249191	---	hypothetical protein	None	None	Function unknown
NTHI0728	68249192	tfoX	DNA transformation protein TfoX	COG3070	TfoX, Regulator of competence-specific genes	Transcription
NTHI0729	68249193	recA	recombinase A	COG0468	RecA, RecA/RadA recombinase	DNA replication, recombination, & repair
NTHI0730	68249194	recX	recombination regulator RecX	COG2137	OraA, Uncharacterized protein conserved in bacteria	General function prediction only
NTHI0731	68249195	ccrB	camphor resistance protein CrcB	COG0239	CrcB, Integral membrane protein possibly involved in chromosome condensation	Cell division & chromosome partitioning
NTHI0732	68249196	---	predicted hydrolase of the HAD superfamily	COG0561	Cof, Predicted hydrolases of the HAD superfamily	General function prediction only
NTHI0733	68249197	argF	ornithine carbamoyltransferase	COG0078	ArgF, Ornithine carbamoyltransferase	Amino acid transport & metabolism
NTHI0734	68249198	arcC	carbamate kinase	COG0549	ArcC, Carbamate kinase	Amino acid transport & metabolism
NTHI0735	68249199	---	predicted membrane protein	COG1288	COG1288, Predicted membrane protein	Function unknown
NTHI0738	68249200	pepE	peptidase E	COG3340	PepE, Peptidase E	Amino acid transport & metabolism
NTHI0739	68249201	dcuC	predicted C4-dicarboxylate transporter	COG3069	DcuC, C4-dicarboxylate transporter	Energy production & conversion
NTHI0740	68249202	abgA	aminobenzoyl-glutamate utilization protein A	COG1473	AbgB, Metal-dependent amidase/aminoacylase/carboxypeptidase	General function prediction only
NTHI0741	68249203	cpdB	bifunctional 2',3'-cyclic nucleotide 2'-phosphodiesterase/3'-nucleotidase periplasmic precursor protein	COG0737	UshA, 5'-nucleotidase/2',3'-cyclic phosphodiesterase and related esterases	Nucleotide transport & metabolism
NTHI0742	68249204	soxR	HTH-type transcriptional regulator	COG0789	SoxR, Predicted transcriptional regulators	Transcription
NTHI0743	68249205	zitB	zinc transporter ZitB	COG1230	CzcD, Co/Zn/Cd efflux system component	Inorganic ion transport & metabolism
NTHI0744	68249206	gidA	tRNA uridine 5-carboxymethylaminomethyl modification enzyme GidA	COG0445	GidA, NAD/FAD-utilizing enzyme apparently involved in cell division	Cell division & chromosome partitioning
NTHI0745	68249207	rpsL	30S ribosomal protein S12	COG0048	RpsL, Ribosomal protein S12	Translation, ribosomal structure & biogenesis
NTHI0746	68249208	rpsG,	30S ribosomal protein S7	COG0049	RpsG, Ribosomal protein S7	Translation, ribosomal structure & biogenesis
NTHI0747	68249209	fusA	elongation factor G	COG0480	FusA, Translation elongation factors (GTPases)	Translation, ribosomal structure & biogenesis
NTHI0748	68249210	tuf	elongation factor Tu	COG0050	TufB, GTPases - translation elongation factors	Translation, ribosomal structure & biogenesis
NTHI0749	68249211	---	predicted chloride channel protein	None	None	Function unknown
NTHI0751	68249212	eriC	predicted chloride channel protein	COG0038	EriC, Chloride channel protein EriC	Inorganic ion transport & metabolism
NTHI0753	68249213	dusA	tRNA-dihydrouridine synthase A	COG0042	COG0042, tRNA-dihydrouridine synthase	Translation, ribosomal structure & biogenesis
NTHI0754	68249214	---	hypothetical protein	COG3691	COG3691, Uncharacterized protein conserved in bacteria	Function unknown
NTHI0755	68249215	trpS	tryptophanyl-tRNA synthetase	COG0180	TrpS, Tryptophanyl-tRNA synthetase	Translation, ribosomal structure & biogenesis
NTHI0757	68249216	---	hypothetical protein	COG2915	COG2915, Uncharacterized protein involved in purine metabolism	General function prediction only
NTHI0758	68249217	purB	adenylosuccinate lyase	COG0015	PurB, Adenylosuccinate lyase	Nucleotide transport & metabolism
NTHI0759	68249218	rplJ	50S ribosomal protein L10	COG0244	RplJ, Ribosomal protein L10	Translation, ribosomal structure & biogenesis
NTHI0761	68249219	rplL	50S ribosomal protein L7/L12	COG0222	RplL, Ribosomal protein L7/L12	Translation, ribosomal structure & biogenesis
NTHI0762	68249220	glmU	bifunctional N-acetylglucosamine-1-phosphate uridyltransferase/glucosamine-1-phosphate acetyltransferase	COG1207	GlmU, N-acetylglucosamine-1-phosphate uridyltransferase (contains nucleotidyltransferase and I-patch acetyltransferase domains)	Cell envelope biogenesis
NTHI0763	68249221	---	hypothetical protein	None	None	Function unknown
NTHI0764	68249222	pldB	probable lysophospholipase L2	COG2267	PldB, Lysophospholipase	Lipid metabolism
NTHI0765	68249223	asd	aspartate-semialdehyde dehydrogenase	COG0136	Asd, Aspartate-semialdehyde dehydrogenase	Amino acid transport & metabolism
NTHI0766	68249224	sapB	hypothetical protein	COG1285	SapB, Uncharacterized membrane protein	Function unknown
NTHI0767	68249225	miaB	predicted 2-methylthioadenine synthetase	COG0621	MiaB, 2-methylthioadenine synthetase	Translation, ribosomal structure & biogenesis
NTHI0768	68249226	mdaB	putative NADPH-quinone reductase, modulator of drug activity B	COG2249	MdaB, Putative NADPH-quinone reductase (modulator of drug activity B)	General function prediction only
NTHI0769	68249227	uvrD	ATP-dependent DNA helicase rep	COG0210	UvrD, Superfamily I DNA and RNA helicases	DNA replication, recombination, & repair
NTHI0770	68249228	---	predicted periplasmic lipoprotein	COG5645	COG5645, Predicted periplasmic lipoprotein	General function prediction only
NTHI0771	68249229	coaD	phosphopantetheine adenylyltransferase	COG0669	CoaD, Phosphopantetheine adenylyltransferase	Coenzyme metabolism
NTHI0772	68249230	kdtA	3-deoxy-D-manno-octulosonic-acid transferase	COG1519	KdtA, 3-deoxy-D-manno-octulosonic-acid transferase	Cell envelope biogenesis
NTHI0773	68249231	lgtF	UDP-glucose--lipooligosaccharide glucosyltransferase	COG0463	WcaA, Glycosyltransferases involved in cell wall biogenesis	Cell envelope biogenesis
NTHI0774	68249232	tag	DNA-3-methyladenine glycosylase	COG2818	Tag, 3-methyladenine DNA glycosylase	DNA replication, recombination, & repair
NTHI0775	68249233	---	hypothetical protein	None	None	Function unknown
NTHI0776	68249234	aroE	shikimate 5-dehydrogenase	COG0169	AroE, Shikimate 5-dehydrogenase	Amino acid transport & metabolism
NTHI0777	68249235	---	predicted translation factor SUA5	COG0009	SUA5, Putative translation factor (SUA5)	Translation, ribosomal structure & biogenesis
NTHI0778	68249236	topA	Zn-finger domain associated with topoisomerase type I	COG0551	TopA, Zn-finger domain associated with topoisomerase type I	DNA replication, recombination, & repair
NTHI0779	68249237	---	probable ABC transporter, ATP-binding protein	COG0488	Uup, ATPase components of ABC transporters with duplicated ATPase domains	General function prediction only
NTHI0780	68249238	---	putative HTH-type transcriptional regulator	COG3620	COG3620, Predicted transcriptional regulator with C-terminal CBS domains	Transcription
NTHI0781	68249239	---	hypothetical protein	COG4679	COG4679, Phage-related protein	Function unknown
NTHI0782	68249240	hgpB	hemoglobin-haptoglobin binding protein B	COG1629	CirA, Outer membrane receptor proteins, mostly Fe transport	Inorganic ion transport & metabolism
NTHI0783	68249241	cydD	hypothetical ABC transporter, ATP-binding protein	COG4988	CydD, ABC-type transport system involved in cytochrome bd biosynthesis, ATPase and permease components	Energy production & conversion; Posttranslational modification, protein turnover, chaperones
NTHI0785	68249242	mdlB	probable ABC transporter, ATP-binding protein	COG1132	MdlB, ABC-type multidrug transport system, ATPase and permease components	Defense mechanisms
NTHI0786	68249243	---	hypothetical protein	COG3550	HipA, Uncharacterized protein related to capsule biosynthesis enzymes	General function prediction only
NTHI0787	68249244	---	hypothetical protein	COG3550	HipA, Uncharacterized protein related to capsule biosynthesis enzymes	General function prediction only
NTHI0788	68249245	---	putative HTH-type transcriptional regulator	None	None	Function unknown
NTHI0789	68249246	glpX	fructose 1,6-bisphosphatase II	COG1494	GlpX, Fructose-1,6-bisphosphatase/sedoheptulose 1,7-bisphosphatase and related proteins	Carbohydrate transport & metabolism
NTHI0790	68249247	---	hypothetical protein	COG3074	COG3074, Uncharacterized protein conserved in bacteria	Function unknown
NTHI0791	68249248	fldA	flavodoxin	COG0716	FldA, Flavodoxins	Energy production & conversion
NTHI0792	68249249	dtd	D-tyrosyl-tRNA deacylase	COG1490	Dtd, D-Tyr-tRNAtyr deacylase	Translation, ribosomal structure & biogenesis
NTHI0793	68249250	ispF	2-C-methyl-D-erythritol 2,4-cyclodiphosphate synthase	COG0245	IspF, 2C-methyl-D-erythritol 2,4-cyclodiphosphate synthase	Lipid metabolism
NTHI0794	68249251	ispD	2-C-methyl-D-erythritol 4-phosphate cytidylyltransferase	COG1211	IspD, 4-diphosphocytidyl-2-methyl-D-erithritol synthase	Lipid metabolism
NTHI0795	68249252	ftsB	cell divison protein FtsB	COG2919	COG2919, Septum formation initiator	Cell division & chromosome partitioning
NTHI0796	68249253	gpt	xanthine-guanine phosphoribosyltransferase	COG0503	Apt, Adenine/guanine phosphoribosyltransferases and related PRPP-binding proteins	Nucleotide transport & metabolism
NTHI0797	68249254	pepD	aminoacyl-histidine dipeptidase	COG2195	PepD, Di- and tripeptidases	Amino acid transport & metabolism
NTHI0798	68249255	xerC	site-specific tyrosine recombinase XerC	COG4973	XerC, Site-specific recombinase XerC	DNA replication, recombination, & repair
NTHI0799	68249256	---	hypothetical protein	None	None	Function unknown
NTHI0800	68249257	tpiA	triosephosphate isomerase	COG0149	TpiA, Triosephosphate isomerase	Carbohydrate transport & metabolism
NTHI0801	68249258	glpE	thiosulfate sulfurtransferase GlpE	COG0607	PspE, Rhodanese-related sulfurtransferase	Inorganic ion transport & metabolism
NTHI0802	68249259	rarD	hypothetical protein	COG2962	RarD, Predicted permeases	General function prediction only
NTHI0803	68249260	ilvY	DNA-binding transcriptional regulator IlvY	COG0583	LysR, Transcriptional regulator	Transcription
NTHI0804	68249261	ilvC	ketol-acid reductoisomerase	COG0059	IlvC, Ketol-acid reductoisomerase	Amino acid transport & metabolism; Coenzyme metabolism
NTHI0805	68249262	glpC	sn-glycerol-3-phosphate dehydrogenase subunit C	COG0247	GlpC, Fe-S oxidoreductase	Energy production & conversion
NTHI0806	68249263	glpB	anaerobic glycerol-3-phosphate dehydrogenase subunit B	COG3075	GlpB, Anaerobic glycerol-3-phosphate dehydrogenase	Amino acid transport & metabolism
NTHI0808	68249264	glpA	sn-glycerol-3-phosphate dehydrogenase subunit A	COG0578	GlpA, Glycerol-3-phosphate dehydrogenase	Energy production & conversion
NTHI0809	68249265	glpT	glycerol-3-phosphate transporter	COG2271	UhpC, Sugar phosphate permease	Carbohydrate transport & metabolism
NTHI0811	68249266	glpQ	glycerophosphodiester phosphodiesterase	COG0584	UgpQ, Glycerophosphoryl diester phosphodiesterase	Energy production & conversion
NTHI0812	68249267	glpF	glycerol uptake facilitator protein	COG0580	GlpF, Glycerol uptake facilitator and related permeases (Major Intrinsic Protein Family)	Carbohydrate transport & metabolism
NTHI0813	68249268	glpK	glycerol kinase	COG0554	GlpK, Glycerol kinase	Energy production & conversion
NTHI0814	68249269	gpt2	xanthine-guanine phosphoribosyltransferase	COG0503	Apt, Adenine/guanine phosphoribosyltransferases and related PRPP-binding proteins	Nucleotide transport & metabolism
NTHI0816	68249270	hel	Outer membrane protein P4, NADP phosphatase	COG2503	COG2503, Predicted secreted acid phosphatase	General function prediction only
NTHI0817	68249271	rluE	ribosomal large subunit pseudouridine synthase E	COG1187	RsuA, 16S rRNA uridine-516 pseudouridylate synthase and related pseudouridylate synthases	Translation, ribosomal structure & biogenesis
NTHI0820	68249272	---	hypothetical protein	COG2911	COG2911, Uncharacterized protein conserved in bacteria	Function unknown
NTHI0821	68249273	---	hypothetical protein	COG0729	COG0729, Outer membrane protein	Cell envelope biogenesis
NTHI0822	68249274	slyD	FKBP-type peptidyl-prolyl cis-trans isomerase SlyD	COG1047	SlpA, FKBP-type peptidyl-prolyl cis-trans isomerases 2	Posttranslational modification, protein turnover, chaperones
NTHI0823	68249275	---	hypothetical protein	COG3076	COG3076, Uncharacterized protein conserved in bacteria	Function unknown
NTHI0824	68249276	truD	tRNA pseudouridine synthase D	COG0585	COG0585, Uncharacterized conserved protein	Function unknown
NTHI0825	68249277	surE	stationary phase survival protein SurE	COG0496	SurE, Predicted acid phosphatase	General function prediction only
NTHI0826	68249278	---	hypothetical protein	COG1238	COG1238, Predicted membrane protein	Function unknown
NTHI0827	68249279	---	hypothetical protein	None	None	Function unknown
NTHI0830	68249280	lppB	outer membrane antigenic lipoprotein B	COG0739	NlpD, Membrane proteins related to metalloendopeptidases	Cell envelope biogenesis
NTHI0831	68249281	tnaA	tryptophanase	COG3033	TnaA, Tryptophanase	Amino acid transport & metabolism
NTHI0832	68249282	tnaB	tryptophan-specific transport protein	COG0814	SdaC, Amino acid permeases	Amino acid transport & metabolism
NTHI0834	68249283	mutS	DNA mismatch repair protein	COG0249	MutS, Mismatch repair ATPase (MutS family)	DNA replication, recombination, & repair
NTHI0835	68249284	selA	selenocysteine synthase	COG1921	SelA, Selenocysteine synthase [seryl-tRNASer selenium transferase]	Amino acid transport & metabolism
NTHI0836	68249285	selB	selenocysteine-specific elongation factor	COG3276	SelB, Selenocysteine-specific translation elongation factor	Translation, ribosomal structure & biogenesis
NTHI0837	68249286	---	hypothetical protein	COG4238	COG4238, Murein lipoprotein	Cell envelope biogenesis
NTHI0838	68249287	relB	DNA-damage-inducible protein J, negative regulator of translation	COG3077	RelB, DNA-damage-inducible protein J	DNA replication, recombination, & repair
NTHI0839	68249288	---	hypothetical protein	COG3041	COG3041, Uncharacterized protein conserved in bacteria	Function unknown
NTHI0843	68249289	tig	trigger factor	COG0544	Tig, FKBP-type peptidyl-prolyl cis-trans isomerase (trigger factor)	Posttranslational modification, protein turnover, chaperones
NTHI0844	68249290	clpP	ATP-dependent Clp protease proteolytic subunit	COG0740	ClpP, Protease subunit of ATP-dependent Clp proteases	Posttranslational modification, protein turnover, chaperones; Intracellular trafficking & secretion
NTHI0846	68249291	clpX	ATP-dependent protease ATP-binding subunit	COG1219	ClpX, ATP-dependent protease Clp, ATPase subunit	Posttranslational modification, protein turnover, chaperones
NTHI0847	68249292	secE	preprotein translocase subunit SecE	COG0690	SecE, Preprotein translocase subunit SecE	Intracellular trafficking & secretion
NTHI0848	68249293	nusG	transcription antitermination protein NusG	COG0250	NusG, Transcription antiterminator	Transcription
NTHI0849	68249294	vacJ	VacJ lipoprotein	COG2853	VacJ, Surface lipoprotein	Cell envelope biogenesis
NTHI0851	68249295	tdcF	putative translation initiation inhibitor, YjgF family	COG0251	TdcF, Putative translation initiation inhibitor, yjgF family	Translation, ribosomal structure & biogenesis
NTHI0852	68249296	htpX	heat shock protein HtpX	COG0501	HtpX, Zn-dependent protease with chaperone function	Posttranslational modification, protein turnover, chaperones
NTHI0853	162000000	sirA	cell developmental protein SirA	COG0425	SirA, Predicted redox protein, regulator of disulfide bond formation	Posttranslational modification, protein turnover, chaperones
NTHI0854	68249298	---	hypothetical protein	COG1739	COG1739, Uncharacterized conserved protein	Function unknown
NTHI0855	68249299	trkH	Trk system potassium uptake protein TrkH	COG0168	TrkG, Trk-type K+ transport systems, membrane components	Inorganic ion transport & metabolism
NTHI0856	68249300	psiE	phosphate-starvation-inducible protein PsiE	COG3223	COG3223, Predicted membrane protein	Function unknown
NTHI0857	68249301	hemY	HemY	COG3071	HemY, Uncharacterized enzyme of heme biosynthesis	Coenzyme metabolism
NTHI0858	68249302	hemX	putative uroporphyrin-III C-methyltransferase	COG2959	HemX, Uncharacterized enzyme of heme biosynthesis	Coenzyme metabolism
NTHI0859	68249303	cyaA	adenylate cyclase	COG3072	CyaA, Adenylate cyclase	Nucleotide transport & metabolism
NTHI0860	68249304	gpsA	NAD(P)H-dependent glycerol-3-phosphate dehydrogenase	COG0240	GpsA, Glycerol-3-phosphate dehydrogenase	Energy production & conversion
NTHI0861	68249305	cysE	serine acetyltransferase	COG1045	CysE, Serine acetyltransferase	Amino acid transport & metabolism
NTHI0862	68249306	aroE	shikimate 5-dehydrogenase	COG0169	AroE, Shikimate 5-dehydrogenase	Amino acid transport & metabolism
NTHI0863	68249307	citT	possible di- and tricarboxylate transporter	COG0471	CitT, Di- and tricarboxylate transporters	Inorganic ion transport & metabolism
NTHI0864	68249308	folD	FolD bifunctional protein	COG0190	FolD, 5,10-methylene-tetrahydrofolate dehydrogenase/Methenyl tetrahydrofolate cyclohydrolase	Coenzyme metabolism
NTHI0865	68249309	fucP	L-fucose permease	COG0738	FucP, Fucose permease	Carbohydrate transport & metabolism
NTHI0866	68249310	fucA	L-fuculose phosphate aldolase	COG0235	AraD, Ribulose-5-phosphate 4-epimerase and related epimerases and aldolases	Carbohydrate transport & metabolism
NTHI0867	68249311	fucU	fucose operon protein FucU	COG4154	FucU, Fucose dissimilation pathway protein FucU	Carbohydrate transport & metabolism
NTHI0870	68249312	fucK	L-fuculokinase	COG1070	XylB, Sugar (pentulose and hexulose) kinases	Carbohydrate transport & metabolism
NTHI0871	162000000	fucI	L-fucose isomerase	COG2407	FucI, L-fucose isomerase and related proteins	Carbohydrate transport & metabolism
NTHI0872	68249314	fucR	L-fucose operon activator	COG1349	GlpR, Transcriptional regulators of sugar metabolism	Transcription; Carbohydrate transport & metabolism
NTHI0873	68249315	hepA	ATP-dependent helicase HepA	COG0553	HepA, Superfamily II DNA/RNA helicases, SNF2 family	Translation, ribosomal structure & biogenesis
NTHI0874	68249316	rluA	ribosomal large subunit pseudouridine synthase A	COG0564	RluA, Pseudouridylate synthases, 23S RNA-specific	Translation, ribosomal structure & biogenesis
NTHI0875	68249317	glpG	GlpG	COG0705	GlpG, Uncharacterized membrane protein (homolog of Drosophila rhomboid)	General function prediction only
NTHI0876	68249318	glpR	glycerol-3-phosphate regulon repressor	COG1349	GlpR, Transcriptional regulators of sugar metabolism	Transcription; Carbohydrate transport & metabolism
NTHI0877	68249319	metQ	probable D-methionine-binding lipoprotein MetQ	COG1464	NlpA, ABC-type metal ion transport system, periplasmic component/surface antigen	Inorganic ion transport & metabolism
NTHI0878	68249320	metI	probable D-methionine transport system permease protein	COG2011	AbcD, ABC-type metal ion transport system, permease component	Inorganic ion transport & metabolism
NTHI0879	68249321	metN	DL-methionine transporter ATP-binding subunit	COG1135	AbcC, ABC-type metal ion transport system, ATPase component	Inorganic ion transport & metabolism
NTHI0880	68249322	hisB	D,D-heptose 1,7-bisphosphate phosphatase	COG0241	HisB, Histidinol phosphatase and related phosphatases	Amino acid transport & metabolism
NTHI0881	68249323	---	hypothetical protein	COG3078	COG3078, Uncharacterized protein conserved in bacteria	Function unknown
NTHI0882	68249324	---	hypothetical protein	None	None	Function unknown
NTHI0883	68249325	narP	nitrate/nitrite response regulator protein	COG2197	CitB, Response regulator containing a CheY-like receiver domain and an HTH DNA-binding domain	Translation, ribosomal structure & biogenesis
NTHI0884	68249326	lysA	diaminopimelate decarboxylase	COG0019	LysA, Diaminopimelate decarboxylase	Amino acid transport & metabolism
NTHI0885	68249327	---	hypothetical protein	COG5567	COG5567, Predicted small periplasmic lipoprotein	Cell motility & secretion
NTHI0886	68249328	cyaY	frataxin-like protein	COG1965	CyaY, Protein implicated in iron transport, frataxin homolog	Inorganic ion transport & metabolism
NTHI0887	68249329	recQ	ATP-dependent DNA helicase RecQ	COG0514	RecQ, Superfamily II DNA helicase	DNA replication, recombination, & repair
NTHI0888	68249330	proS	prolyl-tRNA synthetase	COG0442	ProS, Prolyl-tRNA synthetase	Translation, ribosomal structure & biogenesis
NTHI0889	68249331	ostA	organic solvent tolerance protein	COG1452	Imp, Organic solvent tolerance protein OstA	Cell envelope biogenesis
NTHI0890	68249332	sufI	SufI	COG2132	SufI, Putative multicopper oxidases	Secondary metabolite biosynthesis, transport, & catabolism
NTHI0891	68249333	plsC	1-acyl-sn-glycerol-3-phosphate acyltransferase	COG0204	PlsC, 1-acyl-sn-glycerol-3-phosphate acyltransferase	Lipid metabolism
NTHI0892	68249334	lpxH	UDP-2,3-diacylglucosamine hydrolase	COG2908	COG2908, Uncharacterized protein conserved in bacteria	Function unknown
NTHI0893	68249335	---	conserved hypothetical sodium-dependent transporter	COG0733	COG0733, Na+-dependent transporters of the SNF family	General function prediction only
NTHI0894	68249336	ilvG	acetolactate synthase isozyme II large subunit	COG0028	IlvB, Thiamine pyrophosphate-requiring enzymes [acetolactate synthase, pyruvate dehydrogenase (cytochrome), glyoxylate carboligase, phosphonopyruvate decarboxylase]	Amino acid transport & metabolism; Coenzyme metabolism
NTHI0895	68249337	ilvD	dihydroxy-acid dehydratase	COG0129	IlvD, Dihydroxyacid dehydratase/phosphogluconate dehydratase	Amino acid transport & metabolism; Carbohydrate transport & metabolism
NTHI0896	68249338	thd1	threonine dehydratase	COG1171	IlvA, Threonine dehydratase	Amino acid transport & metabolism
NTHI0897	68249339	dnaE	DNA polymerase III subunit alpha	COG0587	DnaE, DNA polymerase III, alpha subunit	DNA replication, recombination, & repair
NTHI0899	68249340	pgmB	phosphoglucomutase	COG1109	{ManB}, Phosphomannomutase	Carbohydrate transport & metabolism
NTHI0900	68249341	secB	preprotein translocase subunit SecB	COG1952	SecB, Preprotein translocase subunit SecB	Intracellular trafficking & secretion
NTHI0901	68249342	pspE	predicted rhodanese-related sulfurtransferase	COG0607	PspE, Rhodanese-related sulfurtransferase	Inorganic ion transport & metabolism
NTHI0902	68249343	dcuB	anaerobic C4-dicarboxylate transporter	COG2704	DcuB, Anaerobic C4-dicarboxylate transporter	General function prediction only
NTHI0903	68249344	ndhA	NADH dehydrogenase	COG1252	Ndh, NADH dehydrogenase, FAD-containing subunit	Energy production & conversion
NTHI0904	68249345	plsB	glycerol-3-phosphate acyltransferase	COG2937	PlsB, Glycerol-3-phosphate O-acyltransferase	Lipid metabolism
NTHI0905	68249346	lexA	LexA repressor	COG1974	LexA, SOS-response transcriptional repressors (RecA-mediated autopeptidases)	Translation, ribosomal structure & biogenesis
NTHI0906	68249347	dapF	diaminopimelate epimerase	COG0253	DapF, Diaminopimelate epimerase	Amino acid transport & metabolism
NTHI0907	68249348	tpx	probable thiol peroxidase	COG2077	Tpx, Peroxiredoxin	Posttranslational modification, protein turnover, chaperones
NTHI0909	68249349	purL	phosphoribosylformylglycinamidine synthase	COG0046	PurL, Phosphoribosylformylglycinamidine (FGAM) synthase, synthetase domain	Nucleotide transport & metabolism
NTHI0913	68249350	lex2B	UDP-glucose--lipooligosaccharide glucosyltransferase	COG3306	COG3306, Glycosyltransferase involved in LPS biosynthesis	Cell envelope biogenesis
NTHI0914	68249351	---	hypothetical protein	COG2861	COG2861, Uncharacterized protein conserved in bacteria	Function unknown
NTHI0915	68249352	---	predicted membrane-bound metallopeptidase	COG4942	COG4942, Membrane-bound metallopeptidase	Cell division & chromosome partitioning
NTHI0916	68249353	gpmA	phosphoglyceromutase	COG0588	GpmA, Phosphoglycerate mutase 1	Carbohydrate transport & metabolism
NTHI0917	68249354	rpmE	50S ribosomal protein L31	COG0254	RpmE, Ribosomal protein L31	Translation, ribosomal structure & biogenesis
NTHI0919	68249355	mutY	A/G-specific adenine glycosylase	COG1194	MutY, A/G-specific DNA glycosylase	DNA replication, recombination, & repair
NTHI0920	68249356	---	hypothetical protein	COG2924	COG2924, Uncharacterized protein conserved in bacteria	Function unknown
NTHI0921	68249357	mltC	murein transglycosylase C	COG0741	MltE, Soluble lytic murein transglycosylase and related regulatory proteins (some contain LysM/invasin domains)	Cell envelope biogenesis
NTHI0922	68249358	---	predicted diadenosine tetraphosphatase and related serine/threonine protein phosphatase	COG2129	COG2129, Predicted phosphoesterases, related to the Icc protein	General function prediction only
NTHI0923	68249359	nadR	nicotinamide-nucleotide adenylyltransferase	COG3172	NadR, Predicted ATPase/kinase involved in NAD metabolism	Coenzyme metabolism
NTHI0925	68249360	ribB	3,4-dihydroxy-2-butanone 4-phosphate synthase	COG0108	RibB, 3,4-dihydroxy-2-butanone 4-phosphate synthase	Coenzyme metabolism
NTHI0926	68249361	lpsA	lipooligosaccharide glycosyl transferase	COG3306	COG3306, Glycosyltransferase involved in LPS biosynthesis	Cell envelope biogenesis
NTHI0927	68249362	cspR	conserved hypothetical tRNA/rRNA methyltransferase	COG0219	CspR, Predicted rRNA methylase (SpoU class)	Translation, ribosomal structure & biogenesis
NTHI0928	68249363	---	predicted N6-adenine-specific methylase	COG0742	COG0742, N6-adenine-specific methylase	DNA replication, recombination, & repair
NTHI0929	68249364	ftsY	cell division protein FtsY	COG0552	FtsY, Signal recognition particle GTPase	Intracellular trafficking & secretion
NTHI0930	68249365	ftsE	cell division ATP-binding protein FtsE	COG2884	FtsE, Predicted ATPase involved in cell division	Cell division & chromosome partitioning
NTHI0931	68249366	ftsX	cell division protein FtsX	COG2177	FtsX, Cell division protein	Cell division & chromosome partitioning
NTHI0932	68249367	atoB	acetyl-CoA acetyltransferase	COG0183	PaaJ, Acetyl-CoA acetyltransferase	Lipid metabolism
NTHI0933	68249368	atoE	short-chain fatty acids transporter	COG2031	AtoE, Short chain fatty acids transporter	Lipid metabolism
NTHI0934	68249369	atoA	acetate CoA-transferase beta subunit	COG2057	AtoA, Acyl CoA:acetate/3-ketoacid CoA transferase, beta subunit	Lipid metabolism
NTHI0935	68249370	atoD	acetyl-CoA:acetoacetyl-CoA transferase subunit alpha	COG1788	AtoD, Acyl CoA:acetate/3-ketoacid CoA transferase, alpha subunit	Lipid metabolism
NTHI0936	68249371	lysR	putative HTH-type transcriptional regulator	COG0583	LysR, Transcriptional regulator	Transcription
NTHI0937	68249372	rpsJ	30S ribosomal protein S10	COG0051	RpsJ, Ribosomal protein S10	Translation, ribosomal structure & biogenesis
NTHI0938	68249373	rplC	50S ribosomal protein L3	COG0087	RplC, Ribosomal protein L3	Translation, ribosomal structure & biogenesis
NTHI0939	68249374	rplD	50S ribosomal protein L4	COG0088	RplD, Ribosomal protein L4	Translation, ribosomal structure & biogenesis
NTHI0940	68249375	rplW	50S ribosomal protein L23	COG0089	RplW, Ribosomal protein L23	Translation, ribosomal structure & biogenesis
NTHI0941	68249376	rplB	50S ribosomal protein L2	COG0090	RplB, Ribosomal protein L2	Translation, ribosomal structure & biogenesis
NTHI0942	68249377	rpsS	30S ribosomal protein S19	COG0185	RpsS, Ribosomal protein S19	Translation, ribosomal structure & biogenesis
NTHI0943	68249378	rplV	50S ribosomal protein L22	COG0091	RplV, Ribosomal protein L22	Translation, ribosomal structure & biogenesis
NTHI0945	68249379	rpsC	30S ribosomal protein S3	COG0092	RpsC, Ribosomal protein S3	Translation, ribosomal structure & biogenesis
NTHI0946	68249380	rplP	50S ribosomal protein L16	COG0197	RplP, Ribosomal protein L16/L10E	Translation, ribosomal structure & biogenesis
NTHI0947	68249381	rpmC	50S ribosomal protein L29	COG0255	RpmC, Ribosomal protein L29	Translation, ribosomal structure & biogenesis
NTHI0948	68249382	rpsQ	30S ribosomal protein S17	COG0186	RpsQ, Ribosomal protein S17	Translation, ribosomal structure & biogenesis
NTHI0950	68249383	---	hypothetical protein	None	None	Function unknown
NTHI0951	68249384	rplN	50S ribosomal protein L14	COG0093	RplN, Ribosomal protein L14	Translation, ribosomal structure & biogenesis
NTHI0952	68249385	rplX	50S ribosomal protein L24	COG0198	RplX, Ribosomal protein L24	Translation, ribosomal structure & biogenesis
NTHI0953	68249386	rplE	50S ribosomal protein L5	COG0094	RplE, Ribosomal protein L5	Translation, ribosomal structure & biogenesis
NTHI0954	68249387	rpsN	30S ribosomal protein S14	COG0199	RpsN, Ribosomal protein S14	Translation, ribosomal structure & biogenesis
NTHI0955	68249388	rpsH	30S ribosomal protein S8	COG0096	RpsH, Ribosomal protein S8	Translation, ribosomal structure & biogenesis
NTHI0956	68249389	rplF	50S ribosomal protein L6	COG0097	RplF, Ribosomal protein L6P/L9E	Translation, ribosomal structure & biogenesis
NTHI0957	68249390	rplR	50S ribosomal protein L18	COG0256	RplR, Ribosomal protein L18	Translation, ribosomal structure & biogenesis
NTHI0958	68249391	rpsE	30S ribosomal protein S5	COG0098	RpsE, Ribosomal protein S5	Translation, ribosomal structure & biogenesis
NTHI0959	68249392	rpmD	50S ribosomal protein L30	COG1841	RpmD, Ribosomal protein L30/L7E	Translation, ribosomal structure & biogenesis
NTHI0960	68249393	rplO	50S ribosomal protein L15	COG0200	RplO, Ribosomal protein L15	Translation, ribosomal structure & biogenesis
NTHI0961	68249394	secY	preprotein translocase subunit SecY	COG0201	SecY, Preprotein translocase subunit SecY	Intracellular trafficking & secretion
NTHI0962	68249395	rpsM	30S ribosomal protein S13	COG0099	RpsM, Ribosomal protein S13	Translation, ribosomal structure & biogenesis
NTHI0963	68249396	rpsK	30S ribosomal protein S11	COG0100	RpsK, Ribosomal protein S11	Translation, ribosomal structure & biogenesis
NTHI0964	68249397	rpsD	30S ribosomal protein S4	COG0522	RpsD, Ribosomal protein S4 and related proteins	Translation, ribosomal structure & biogenesis
NTHI0965	68249398	rpoA	DNA-directed RNA polymerase subunit alpha	COG0202	RpoA, DNA-directed RNA polymerase, alpha subunit/40 kD subunit	Transcription
NTHI0966	68249399	rplQ	50S ribosomal protein L17	COG0203	RplQ, Ribosomal protein L17	Translation, ribosomal structure & biogenesis
NTHI0967	68249400	---	predicted cAMP-binding protein	COG0664	Crp, cAMP-binding proteins - catabolite gene activator and regulatory subunit of cAMP-dependent protein kinases	Signal transduction
NTHI0970	68249401	---	predicted permease	COG0730	COG0730, Predicted permeases	General function prediction only
NTHI0971	68249402	dxr	1-deoxy-D-xylulose 5-phosphate reductoisomerase	COG0743	Dxr, 1-deoxy-D-xylulose 5-phosphate reductoisomerase	Lipid metabolism
NTHI0972	68249403	frr	ribosome recycling factor	COG0233	Frr, Ribosome recycling factor	Translation, ribosomal structure & biogenesis
NTHI0973	68249404	pckA	phosphoenolpyruvate carboxykinase	COG1866	PckA, Phosphoenolpyruvate carboxykinase (ATP)	Energy production & conversion
NTHI0974	68249405	hslO	Hsp33-like chaperonin	COG1281	COG1281, Disulfide bond chaperones of the HSP33 family	Posttranslational modification, protein turnover, chaperones
NTHI0975	68249406	argH	argininosuccinate lyase	COG0165	ArgH, Argininosuccinate lyase	Amino acid transport & metabolism
NTHI0976	68249407	galU	UTP--glucose-1-phosphate uridylyltransferase	COG1210	GalU, UDP-glucose pyrophosphorylase	Cell envelope biogenesis
NTHI0977	68249408	csrA	carbon storage regulator	COG1551	CsrA, Carbon storage regulator (could also regulate swarming and quorum sensing)	Signal transduction
NTHI0978	68249409	alaS	alanyl-tRNA synthetase	COG0013	AlaS, Alanyl-tRNA synthetase	Translation, ribosomal structure & biogenesis
NTHI0979	68249410	uspA	universal stress protein A	COG0589	UspA, Universal stress protein UspA and related nucleotide-binding proteins	Signal transduction
NTHI0980	68249411	pepP	Xaa-Pro aminopeptidase	COG0006	PepP, Xaa-Pro aminopeptidase	Amino acid transport & metabolism
NTHI0981	68249412	---	hypothetical protein	COG3079	COG3079, Uncharacterized protein conserved in bacteria	Function unknown
NTHI0982	68249413	galM	aldose 1-epimerase	COG2017	GalM, Galactose mutarotase and related enzymes	Carbohydrate transport & metabolism
NTHI0983	68249414	galK	galactokinase	COG0153	GalK, Galactokinase	Carbohydrate transport & metabolism
NTHI0984	68249415	galT	galactose-1-phosphate uridylyltransferase	COG1085	GalT, Galactose-1-phosphate uridylyltransferase	Energy production & conversion
NTHI0986	68249416	galR	HTH-type transcriptional regulator GalR	COG1609	PurR, Transcriptional regulators	Transcription
NTHI0987	68249417	mglB	D-galactose-binding periplasmic protein precursor	COG1879	RbsB, ABC-type sugar transport system, periplasmic component	Carbohydrate transport & metabolism
NTHI0988	68249418	mglA	galactose/methyl galaxtoside transporter ATP-binding protein	COG1129	MglA, ABC-type sugar transport system, ATPase component	Carbohydrate transport & metabolism
NTHI0989	68249419	mglC	beta-methylgalactoside transporter inner membrane component	COG4211	MglC, ABC-type glucose/galactose transport system, permease component	Carbohydrate transport & metabolism
NTHI0990	68249420	---	hypothetical protein	None	None	Function unknown
NTHI0991	68249421	ispZ	intracellular septation protein A	COG2917	COG2917, Intracellular septation protein A	Cell division & chromosome partitioning
NTHI0992	68249422	---	putative acyl-CoA thioester hydrolase	COG1607	COG1607, Acyl-CoA hydrolase	Lipid metabolism
NTHI0994	68249423	---	YciI-like protein	COG2350	COG2350, Uncharacterized protein conserved in bacteria	Function unknown
NTHI0995	68249424	slt	putative soluble lytic murein transglycosylase	COG0741	MltE, Soluble lytic murein transglycosylase and related regulatory proteins (some contain LysM/invasin domains)	Cell envelope biogenesis
NTHI0996	68249425	trpR	Trp operon repressor	COG2973	TrpR, Trp operon repressor	Transcription
NTHI0997	162000000	mtgA	monofunctional biosynthetic peptidoglycan transglycosylase	COG0744	MrcB, Membrane carboxypeptidase (penicillin-binding protein)	Cell envelope biogenesis
NTHI0998	68249427	frdD	fumarate reductase subunit D	COG3080	FrdD, Fumarate reductase subunit D	Energy production & conversion
NTHI0999	68249428	frdC	fumarate reductase subunit C	COG3029	FrdC, Fumarate reductase subunit C	Energy production & conversion
NTHI1000	68249429	frdB	fumarate reductase iron-sulfur subunit	COG0479	FrdB, Succinate dehydrogenase/fumarate reductase, Fe-S protein subunit	Energy production & conversion
NTHI1002	68249430	frdA	fumarate reductase flavoprotein subunit	COG1053	SdhA, Succinate dehydrogenase/fumarate reductase, flavoprotein subunit	Energy production & conversion
NTHI1003	162000000	genX	lysyl-tRNA synthetase	COG2269	COG2269, Truncated, possibly inactive, lysyl-tRNA synthetase (class II)	Translation, ribosomal structure & biogenesis
NTHI1004	68249432	cpxR	transcriptional regulatory protein CpxR	COG0745	OmpR, Response regulators consisting of a CheY-like receiver domain and a winged-helix DNA-binding domain	Translation, ribosomal structure & biogenesis
NTHI1005	68249433	smpA	small protein A	COG2913	SmpA, Small protein A (tmRNA-binding)	Translation, ribosomal structure & biogenesis
NTHI1006	68249434	ndpA	nucleoid-associated protein NdpA	COG3081	COG3081, Nucleoid-associated protein	General function prediction only
NTHI1007	68249435	---	hypothetical protein	COG3082	COG3082, Uncharacterized protein conserved in bacteria	Function unknown
NTHI1008	68249436	---	predicted hydrolase of alkaline phosphatase superfamily	COG3083	COG3083, Predicted hydrolase of alkaline phosphatase superfamily	General function prediction only
NTHI1009	68249437	ssnA	hypothetical protein	COG0402	SsnA, Cytosine deaminase and related metal-dependent hydrolases	Nucleotide transport & metabolism
NTHI1010	68249438	mobA	molybdopterin-guanine dinucleotide biosynthesis protein A	COG0746	MobA, Molybdopterin-guanine dinucleotide biosynthesis protein A	Coenzyme metabolism
NTHI1011	68249439	---	hypothetical protein	COG3084	COG3084, Uncharacterized protein conserved in bacteria	Function unknown
NTHI1012	68249440	dsbA	thiol:disulfide interchange protein DsbA	COG1651	DsbG, Protein-disulfide isomerase	Posttranslational modification, protein turnover, chaperones
NTHI1013	68249441	---	hypothetical protein	COG3085	COG3085, Uncharacterized protein conserved in bacteria	Function unknown
NTHI1014	68249442	trmA	tRNA (uracil-5-)-methyltransferase	COG2265	TrmA, SAM-dependent methyltransferases related to tRNA (uracil-5-)-methyltransferase	Translation, ribosomal structure & biogenesis
NTHI1015	68249443	---	hypothetical protein	None	None	Function unknown
NTHI1016	68249444	rseC	predicted positive regulator of sigma E	COG3086	RseC, Positive regulator of sigma E activity	Signal transduction
NTHI1019	68249445	mobB	molybdopterin-guanine dinucleotide biosynthesis protein B	COG1763	MobB, Molybdopterin-guanine dinucleotide biosynthesis protein	Coenzyme metabolism
NTHI1020	68249446	araJ	hypothetical protein	COG2814	AraJ, Arabinose efflux permease	Carbohydrate transport & metabolism
NTHI1021	68249447	hbpA	heme-binding protein A	COG0747	DdpA, ABC-type dipeptide transport system, periplasmic component	Amino acid transport & metabolism
NTHI1022	68249448	hugZ	putative heme iron utilization protein	COG0748	HugZ, Putative heme iron utilization protein	Inorganic ion transport & metabolism
NTHI1023	68249449	---	hypothetical protein	COG3681	COG3681, Uncharacterized conserved protein	Function unknown
NTHI1024	68249450	polA	DNA polymerase I	COG0749	PolA, DNA polymerase I - 3'-5' exonuclease and polymerase domains	DNA replication, recombination, & repair
NTHI1025	68249451	---	hypothetical protein	COG3027	COG3027, Uncharacterized protein conserved in bacteria	Function unknown
NTHI1027	68249452	---	predicted 5-formyltetrahydrofolate cyclo-ligase	COG0212	COG0212, 5-formyltetrahydrofolate cyclo-ligase	Coenzyme metabolism
NTHI1028	68249453	clpB	ClpB	COG0542	ClpA, ATPases with chaperone activity, ATP-binding subunit	Posttranslational modification, protein turnover, chaperones
NTHI1029	68249454	spoU	23S rRNA (guanosine-2'-O-)-methyltransferase	COG0566	SpoU, rRNA methylases	Translation, ribosomal structure & biogenesis
NTHI1030	68249455	vacB	ribonuclease R	COG0557	VacB, Exoribonuclease R	Transcription
NTHI1031	68249456	---	hypothetical protein	COG1738	COG1738, Uncharacterized conserved protein	Function unknown
NTHI1032	162000000	pdxH	pyridoxamine 5'-phosphate oxidase	COG0259	PdxH, Pyridoxamine-phosphate oxidase	Coenzyme metabolism
NTHI1033	68249458	typA	GTP-binding protein TypA/ BipA	COG1217	TypA, Predicted membrane GTPase involved in stress response	Signal transduction
NTHI1034	68249459	lic3A2	CMP-neu5Ac--lipooligosaccharide alpha 2-3 sialyltransferase	None	None	Function unknown
NTHI1036	68249460	glnA	glutamine synthetase	COG0174	GlnA, Glutamine synthetase	Amino acid transport & metabolism
NTHI1037	68249461	rmlB	dTDP-glucose 4,6-dehydratase	COG1088	RfbB, dTDP-D-glucose 4,6-dehydratase	Cell envelope biogenesis
NTHI1038	68249462	pepB	aminopeptidase B	COG0260	PepB, Leucyl aminopeptidase	Amino acid transport & metabolism
NTHI1039	68249463	ndk	nucleoside diphosphate kinase	COG0105	Ndk, Nucleoside diphosphate kinase	Nucleotide transport & metabolism
NTHI1040	68249464	obgE	GTPase ObgE	COG0536	Obg, Predicted GTPase	General function prediction only
NTHI1041	68249465	rhaT	conserved hypothetical transport protein	COG0697	RhaT, Permeases of the drug/metabolite transporter (DMT) superfamily	Amino acid transport & metabolism; Carbohydrate transport & metabolism
NTHI1042	68249466	rpmA	50S ribosomal protein L27	COG0211	RpmA, Ribosomal protein L27	Translation, ribosomal structure & biogenesis
NTHI1043	68249467	rplU	50S ribosomal protein L21	COG0261	RplU, Ribosomal protein L21	Translation, ribosomal structure & biogenesis
NTHI1044	68249468	ispB	octaprenyl-diphosphate synthase	COG0142	IspA, Geranylgeranyl pyrophosphate synthase	Coenzyme metabolism
NTHI1045	68249469	---	hypothetical protein	COG1636	COG1636, Uncharacterized protein conserved in bacteria	Function unknown
NTHI1046	68249470	alsT	predicted Na+/alanine symporter	COG1115	AlsT, Na+/alanine symporter	Amino acid transport & metabolism
NTHI1047	68249471	arcA	DNA-binding response regulator in two-component regulatory system with ArcB or CpxA	COG0745	OmpR, Response regulators consisting of a CheY-like receiver domain and a winged-helix DNA-binding domain	Translation, ribosomal structure & biogenesis
NTHI1048	68249472	dipZ	thiol:disulfide interchange protein precursor	COG4232	COG4232, Thiol:disulfide interchange protein	Posttranslational modification, protein turnover, chaperones; Energy production & conversion
NTHI1049	68249473	---	predicted membrane protein	COG2259	COG2259, Predicted membrane protein	Function unknown
NTHI1051	68249474	purH	bifunctional phosphoribosylaminoimidazolecarboxamide formyltransferase/IMP cyclohydrolase	COG0138	PurH, AICAR transformylase/IMP cyclohydrolase PurH (only IMP cyclohydrolase domain in Aful)	Nucleotide transport & metabolism
NTHI1052	68249475	purD	phosphoribosylamine--glycine ligase	COG0151	PurD, Phosphoribosylamine-glycine ligase	Nucleotide transport & metabolism
NTHI1054	68249476	glyA	serine hydroxymethyltransferase	COG0112	GlyA, Glycine/serine hydroxymethyltransferase	Amino acid transport & metabolism
NTHI1055	68249477	coaE	dephospho-CoA kinase	COG0237	CoaE, Dephospho-CoA kinase	Coenzyme metabolism
NTHI1056	68249478	---	zinc-binding protein	COG3024	COG3024, Uncharacterized protein conserved in bacteria	Function unknown
NTHI1057	68249479	rhlB	ATP-dependent RNA helicase RhlB	COG0513	SrmB, Superfamily II DNA and RNA helicases	DNA replication, recombination, & repair; Transcription; Translation, ribosomal structure & biogenesis
NTHI1058	68249480	acrR	hypothetical transcriptional regulator	COG1309	AcrR, Transcriptional regulator	Transcription
NTHI1059	68249481	acrA	predicted membrane-fusion protein	COG0845	AcrA, Membrane-fusion protein	Cell envelope biogenesis
NTHI1060	68249482	acrG	predicted cation/multidrug efflux pump	COG0841	AcrB, Cation/multidrug efflux pump	Defense mechanisms
NTHI1061	68249483	ftsN	predicted cell division protein	COG3087	FtsN, Cell division protein	Cell division & chromosome partitioning
NTHI1062	68249484	emrB	multidrug resistance protein	COG2814	AraJ, Arabinose efflux permease	Carbohydrate transport & metabolism
NTHI1063	68249485	emrA	multidrug resistance protein A	COG1566	EmrA, Multidrug resistance efflux pump	Defense mechanisms
NTHI1065	68249486	folA	dihydrofolate reductase	COG0262	FolA, Dihydrofolate reductase	Coenzyme metabolism
NTHI1066	68249487	proB	gamma-glutamyl kinase	COG0263	ProB, Glutamate 5-kinase	Amino acid transport & metabolism
NTHI1068	68249488	nudH	dinucleoside polyphosphate hydrolase	COG0494	MutT, NTP pyrophosphohydrolases including oxidative damage repair enzymes	DNA replication, recombination, & repair
NTHI1069	68249489	---	predicted permease	COG0730	COG0730, Predicted permeases	General function prediction only
NTHI1071	68249490	lgt	prolipoprotein diacylglyceryl transferase	COG0682	Lgt, Prolipoprotein diacylglyceryltransferase	Cell envelope biogenesis
NTHI1072	68249491	thyA	thymidylate synthase	COG0207	ThyA, Thymidylate synthase	Nucleotide transport & metabolism
NTHI1073	68249492	cumB	hypothetical protein	COG0590	CumB, Cytosine/adenosine deaminases	Nucleotide transport & metabolism; Translation, ribosomal structure & biogenesis
NTHI1074	68249493	---	hypothetical protein	COG4701	COG4701, Uncharacterized protein conserved in bacteria	Function unknown
NTHI1075	68249494	---	hypothetical protein	None	None	Function unknown
NTHI1076	68249495	secA	preprotein translocase subunit SecA	COG0653	SecA, Preprotein translocase subunit SecA (ATPase, RNA helicase)	Intracellular trafficking & secretion
NTHI1077	68249496	mutT	mutator protein MutT	COG1051	COG1051, ADP-ribose pyrophosphatase	Nucleotide transport & metabolism
NTHI1078	68249497	kefB	glutathione-regulated potassium-efflux system protein	COG0475	KefB, Kef-type K+ transport systems, membrane components	Inorganic ion transport & metabolism
NTHI1079	68249498	---	conserved hypothetical SAM-dependent methyltransferase	COG2230	Cfa, Cyclopropane fatty acid synthase and related methyltransferases	Cell envelope biogenesis
NTHI1080	162000000	rpsB	30S ribosomal protein S2	COG0052	RpsB, Ribosomal protein S2	Translation, ribosomal structure & biogenesis
NTHI1081	68249500	tsf	elongation factor Ts	COG0264	Tsf, Translation elongation factor Ts	Translation, ribosomal structure & biogenesis
NTHI1082	68249501	lpxD	UDP-3-O-[3-hydroxymyristoyl] glucosamine N-acyltransferase	COG1044	LpxD, UDP-3-O-	Lipid metabolism
NTHI1083	68249502	omp26	Outer membrane protein 26	COG2825	HlpA, Outer membrane protein	Cell envelope biogenesis
NTHI1084	68249503	---	protective surface antigen D15	COG4775	COG4775, Outer membrane protein/protective antigen OMA87	Cell envelope biogenesis
NTHI1085	68249504	---	predicted membrane bound zinc metalloprotease with PDZ domain	COG0750	COG0750, Predicted membrane-associated Zn-dependent proteases 1	Cell envelope biogenesis
NTHI1087	68249505	cdsA	phosphatidate cytidylyltransferase	COG0575	CdsA, CDP-diglyceride synthetase	Lipid metabolism
NTHI1088	68249506	uppS	undecaprenyl pyrophosphate synthetase	COG0020	UppS, Undecaprenyl pyrophosphate synthase	Lipid metabolism
NTHI1090	68249507	leuS	leucyl-tRNA synthetase	COG0495	LeuS, Leucyl-tRNA synthetase	Translation, ribosomal structure & biogenesis
NTHI1091	68249508	rlpB	conserved predicted lipoprotein	COG2980	RlpB, Rare lipoprotein B	Cell envelope biogenesis
NTHI1092	68249509	holA	DNA polymerase III subunit delta	COG1466	HolA, DNA polymerase III, delta subunit	DNA replication, recombination, & repair
NTHI1093	68249510	glyS	glycyl-tRNA synthetase subunit beta	COG0751	GlyS, Glycyl-tRNA synthetase, beta subunit	Translation, ribosomal structure & biogenesis
NTHI1094	68249511	---	hypothetical protein	None	None	Function unknown
NTHI1095	68249512	---	hypothetical protein	COG2852	COG2852, Uncharacterized protein conserved in bacteria	Function unknown
NTHI1097	68249513	---	glutaredoxin-related protein	COG4545	COG4545, Glutaredoxin-related protein	Posttranslational modification, protein turnover, chaperones
NTHI1098	68249514	glyQ	glycyl-tRNA synthetase subunit alpha	COG0752	GlyQ, Glycyl-tRNA synthetase, alpha subunit	Translation, ribosomal structure & biogenesis
NTHI1099	68249515	hktE	catalase	COG0753	KatE, Catalase	Inorganic ion transport & metabolism
NTHI1100	68249516	gsp	predicted glutathionylspermidine synthase	COG0754	Gsp, Glutathionylspermidine synthase	Amino acid transport & metabolism
NTHI1101	68249517	---	hypothetical protein	None	None	Function unknown
NTHI1102	68249518	---	hypothetical protein	COG4316	COG4316, Uncharacterized protein conserved in bacteria	Function unknown
NTHI1103	68249519	eno	phosphopyruvate hydratase	COG0148	Eno, Enolase	Carbohydrate transport & metabolism
NTHI1104	68249520	---	hypothetical protein	COG2081	COG2081, Predicted flavoproteins	General function prediction only
NTHI1105	68249521	nrfF	formate-dependent nitrite reductase complex nrfFG subunit	COG4235	COG4235, Cytochrome c biogenesis factor	Posttranslational modification, protein turnover, chaperones
NTHI1106	68249522	dsbE2	probable thiol:disulfide interchange protein DsbE	COG0526	TrxA, Thiol-disulfide isomerase and thioredoxins	Posttranslational modification, protein turnover, chaperones; Energy production & conversion
NTHI1107	68249523	nrfE	cytochrome c-type biogenesis protein NrfE	COG1138	CcmF, Cytochrome c biogenesis factor	Posttranslational modification, protein turnover, chaperones
NTHI1108	68249524	suhB	inositol-1-monophosphatase	COG0483	SuhB, Archaeal fructose-1,6-bisphosphatase and related enzymes of inositol monophosphatase family	Carbohydrate transport & metabolism
NTHI1109	68249525	pulG	hypothetical protein	COG2165	PulG, Type II secretory pathway, pseudopilin PulG	Cell motility & secretion; Intracellular trafficking & secretion
NTHI1110	68249526	pulJ	predicted Type II secretory pathway, PulJ-like protein	COG4795	PulJ, Type II secretory pathway, component PulJ	Intracellular trafficking & secretion
NTHI1111	68249527	---	hypothetical protein	None	None	Function unknown
NTHI1112	68249528	---	hypothetical protein	None	None	Function unknown
NTHI1113	68249529	recC	exodeoxyribonuclease V gamma chain	COG1330	RecC, Exonuclease V gamma subunit	DNA replication, recombination, & repair
NTHI1114	68249530	---	hypothetical protein	COG1327	COG1327, Predicted transcriptional regulator, consists of a Zn-ribbon and ATP-cone domains	Transcription
NTHI1115	68249531	ribD	riboflavin biosynthesis protein RibD	COG1985	RibD, Pyrimidine reductase, riboflavin biosynthesis	Coenzyme metabolism
NTHI1116	68249532	degS	protease DegS	COG0265	DegQ, Trypsin-like serine proteases, typically periplasmic, contain C-terminal PDZ domain	Posttranslational modification, protein turnover, chaperones
NTHI1118	68249533	mutM	formamidopyrimidine-DNA glycosylase	COG0266	Nei, Formamidopyrimidine-DNA glycosylase	DNA replication, recombination, & repair
NTHI1119	68249534	ddc	L-2,4-diaminobutyrate decarboxylase	COG0076	GadB, Glutamate decarboxylase and related PLP-dependent proteins	Amino acid transport & metabolism
NTHI1120	68249535	vapC	predicted nucleic acid-binding protein, contains PIN domain	COG1487	VapC, Predicted nucleic acid-binding protein, contains PIN domain	General function prediction only
NTHI1121	68249536	vagC	hypothetical protein	COG4456	VagC, Virulence-associated protein and related proteins	Function unknown
NTHI1122	68249537	dat	diaminobutyrate--2-oxoglutarate aminotransferase	COG0160	GabT, 4-aminobutyrate aminotransferase and related aminotransferases	Amino acid transport & metabolism
NTHI1123	68249538	rpmG	50S ribosomal protein L33	COG0267	RpmG, Ribosomal protein L33	Translation, ribosomal structure & biogenesis
NTHI1124	68249539	rpmB	50S ribosomal protein L28	COG0227	RpmB, Ribosomal protein L28	Translation, ribosomal structure & biogenesis
NTHI1125	68249540	radC	DNA repair protein RadC	COG2003	RadC, DNA repair proteins	DNA replication, recombination, & repair
NTHI1126	68249541	dfp	bifunctional phosphopantothenoylcysteine decarboxylase/phosphopantothenate synthase	COG0452	Dfp, Phosphopantothenoylcysteine synthetase/decarboxylase	Coenzyme metabolism
NTHI1127	68249542	dut	deoxyuridine 5'-triphosphate nucleotidohydrolase	COG0756	Dut, dUTPase	Nucleotide transport & metabolism
NTHI1128	68249543	slmA	nucleoid occlusion protein	COG1309	AcrR, Transcriptional regulator	Transcription
NTHI1129	68249544	---	hypothetical protein	COG3089	COG3089, Uncharacterized protein conserved in bacteria	Function unknown
NTHI1130	68249545	crp	cAMP-regulatory protein	COG0664	Crp, cAMP-binding proteins - catabolite gene activator and regulatory subunit of cAMP-dependent protein kinases	Signal transduction
NTHI1131	68249546	rumB	23S rRNA metyluridine methyltransferase	COG2265	TrmA, SAM-dependent methyltransferases related to tRNA (uracil-5-)-methyltransferase	Translation, ribosomal structure & biogenesis
NTHI1132	68249547	nagZ	beta-hexosaminidase	COG1472	BglX, Beta-glucosidase-related glycosidases	Carbohydrate transport & metabolism
NTHI1133	68249548	---	predicted periplasmic lipoprotein	COG5633	COG5633, Predicted periplasmic lipoprotein	General function prediction only
NTHI1134	68249549	---	HIT-like protein	COG0537	Hit, Diadenosine tetraphosphate (Ap4A) hydrolase and other HIT family hydrolases	Nucleotide transport & metabolism; Carbohydrate transport & metabolism
NTHI1135	68249550	ileS	isoleucyl-tRNA synthetase	COG0060	IleS, Isoleucyl-tRNA synthetase	Translation, ribosomal structure & biogenesis
NTHI1136	68249551	ribF	bifunctional riboflavin kinase/FMN adenylyltransferase	COG0196	RibF, FAD synthase	Coenzyme metabolism
NTHI1137	68249552	mviN	putative virulence factor MviN	COG0728	MviN, Uncharacterized membrane protein, putative virulence factor	General function prediction only
NTHI1139	162000000	rpsT	30S ribosomal protein S20	COG0268	RpsT, Ribosomal protein S20	Translation, ribosomal structure & biogenesis
NTHI1140	68249554	---	hypothetical protein	None	None	Function unknown
NTHI1141	68249555	menB	naphthoate synthase	COG0447	MenB, Dihydroxynaphthoic acid synthase	Coenzyme metabolism
NTHI1142	68249556	menC	O-succinylbenzoate synthase	COG1441	MenC, O-succinylbenzoate synthase	Coenzyme metabolism
NTHI1143	68249557	aroQ	3-dehydroquinate dehydratase	COG0757	AroQ, 3-dehydroquinate dehydratase II	Amino acid transport & metabolism
NTHI1144	68249558	accB	acetyl-CoA carboxylase biotin carboxyl carrier protein subunit	COG0511	AccB, Biotin carboxyl carrier protein	Lipid metabolism
NTHI1145	68249559	accC	acetyl-CoA carboxylase biotin carboxylase subunit	COG0439	AccC, Biotin carboxylase	Lipid metabolism
NTHI1146	68249560	---	hypothetical protein	COG3924	COG3924, Predicted membrane protein	Function unknown
NTHI1147	68249561	panF	sodium/panthothenate symporter	COG4145	PanF, Na+/panthothenate symporter	Coenzyme metabolism
NTHI1148	68249562	---	hypothetical protein	COG5006	COG5006, Predicted permease, DMT superfamily	General function prediction only
NTHI1149	68249563	prmA	ribosomal protein L11 methyltransferase	COG2264	PrmA, Ribosomal protein L11 methylase	Translation, ribosomal structure & biogenesis
NTHI1151	68249564	dusB	tRNA-dihydrouridine synthase B	COG0042	COG0042, tRNA-dihydrouridine synthase	Translation, ribosomal structure & biogenesis
NTHI1152	68249565	fis	DNA-binding protein Fis	COG2901	Fis, Factor for inversion stimulation Fis, transcriptional activator	Translation, ribosomal structure & biogenesis
NTHI1153	68249566	smpB	SsrA-binding protein	COG0691	SmpB, tmRNA-binding protein	Posttranslational modification, protein turnover, chaperones
NTHI1154	68249567	pfkA	6-phosphofructokinase	COG0205	PfkA, 6-phosphofructokinase	Carbohydrate transport & metabolism
NTHI1155	68249568	---	hypothetical protein	None	None	Function unknown
NTHI1156	68249569	---	hypothetical protein	COG3022	COG3022, Uncharacterized protein conserved in bacteria	Function unknown
NTHI1157	68249570	smf	Smf	COG0758	Smf, Predicted Rossmann fold nucleotide-binding protein involved in DNA uptake	DNA replication, recombination, & repair; Intracellular trafficking & secretion
NTHI1160	68249571	leuA	2-isopropylmalate synthase	COG0119	LeuA, Isopropylmalate/homocitrate/citramalate synthases	Amino acid transport & metabolism
NTHI1161	68249572	leuB	3-isopropylmalate dehydrogenase	COG0473	LeuB, Isocitrate/isopropylmalate dehydrogenase	Amino acid transport & metabolism
NTHI1162	68249573	leuC	isopropylmalate isomerase large subunit	COG0065	LeuC, 3-isopropylmalate dehydratase large subunit	Amino acid transport & metabolism
NTHI1163	68249574	leuD	isopropylmalate isomerase small subunit	COG0066	LeuD, 3-isopropylmalate dehydratase small subunit	Amino acid transport & metabolism
NTHI1164	68249575	iga1	IgA-specific serine endopeptidase	COG3468	AidA, Type V secretory pathway, adhesin AidA	Cell envelope biogenesis; Intracellular trafficking & secretion
NTHI1165	68249576	recF	recombination protein F	COG1195	RecF, Recombinational DNA repair ATPase (RecF pathway)	DNA replication, recombination, & repair
NTHI1166	68249577	dnaN	DNA polymerase III subunit beta	COG0592	DnaN, DNA polymerase sliding clamp subunit (PCNA homolog)	DNA replication, recombination, & repair
NTHI1167	68249578	dnaA	chromosomal replication initiation protein	COG0593	DnaA, ATPase involved in DNA replication initiation	DNA replication, recombination, & repair
NTHI1168	68249579	tbp1	transferrin-binding protein 1	COG1629	CirA, Outer membrane receptor proteins, mostly Fe transport	Inorganic ion transport & metabolism
NTHI1169	68249580	tbp2	transferrin-binding protein 2	None	None	Function unknown
NTHI1171	68249581	---	hypothetical protein	COG4783	COG4783, Putative Zn-dependent protease, contains TPR repeats	General function prediction only
NTHI1172	68249582	rpmH	50S ribosomal protein L34	COG0230	RpmH, Ribosomal protein L34	Translation, ribosomal structure & biogenesis
NTHI1173	68249583	rnpA	ribonuclease P	COG0594	RnpA, RNase P protein component	Translation, ribosomal structure & biogenesis
NTHI1174	68249584	---	hypothetical protein	COG0759	COG0759, Uncharacterized conserved protein	Function unknown
NTHI1175	68249585	yidC	putative inner membrane protein translocase component YidC	COG0706	YidC, Preprotein translocase subunit YidC	Intracellular trafficking & secretion
NTHI1178	68249586	trmE	tRNA modification GTPase TrmE	COG0486	ThdF, Predicted GTPase	General function prediction only
NTHI1179	68249587	ppiD	peptidyl-prolyl cis-trans isomerase D	COG0760	SurA, Parvulin-like peptidyl-prolyl isomerase	Posttranslational modification, protein turnover, chaperones
NTHI1180	68249588	---	predicted PE--lipooligosaccharide phosphorylethanolamine transferase	COG2194	COG2194, Predicted membrane-associated, metal-dependent hydrolase	General function prediction only
NTHI1181	68249589	lspA	lipoprotein signal peptidase	COG0597	LspA, Lipoprotein signal peptidase	Cell envelope biogenesis; Intracellular trafficking & secretion
NTHI1182	68249590	ispH	4-hydroxy-3-methylbut-2-enyl diphosphate reductase	COG0761	LytB, Penicillin tolerance protein	Lipid metabolism; Cell envelope biogenesis
NTHI1183	68249591	---	hypothetical protein	COG1555	ComEA, DNA uptake protein and related DNA-binding proteins	DNA replication, recombination, & repair
NTHI1185	68249592	tbpA	thiamine-binding periplasmic protein	COG4143	TbpA, ABC-type thiamine transport system, periplasmic component	Coenzyme metabolism
NTHI1186	68249593	thiP	thiamin transporter membrane protein	COG1178	ThiP, ABC-type Fe3+ transport system, permease component	Inorganic ion transport & metabolism
NTHI1187	68249594	thiQ	thiamine transport ATP-binding protein	COG3840	ThiQ, ABC-type thiamine transport system, ATPase component	Coenzyme metabolism
NTHI1188	68249595	bioB	Biotin synthase	COG0502	BioB, Biotin synthase and related enzymes	Coenzyme metabolism
NTHI1189	68249596	tktA	transketolase	COG0021	TktA, Transketolase	Carbohydrate transport & metabolism
NTHI1192	68249597	serB	phosphoserine phosphatase	COG0560	SerB, Phosphoserine phosphatase	Amino acid transport & metabolism
NTHI1194	68249598	---	nucleotide-binding protein	COG1666	COG1666, Uncharacterized protein conserved in bacteria	Function unknown
NTHI1195	68249599	corA	magnesium/nickel/cobalt transporter CorA	COG0598	CorA, Mg2+ and Co2+ transporters	Inorganic ion transport & metabolism
NTHI1196	68249600	---	predicted integral membrane protein	COG0762	COG0762, Predicted integral membrane protein	Function unknown
NTHI1197	68249601	---	predicted glutamine amidotransferase	COG0121	COG0121, Predicted glutamine amidotransferase	General function prediction only
NTHI1198	68249602	---	hypothetical protein	None	None	Function unknown
NTHI1199	68249603	---	predicted ATPase	COG1373	COG1373, Predicted ATPase (AAA+ superfamily)	General function prediction only
NTHI1201	68249604	rimM	hypothetical protein	COG0806	RimM, RimM protein, required for 16S rRNA processing	Translation, ribosomal structure & biogenesis
NTHI1203	68249605	---	predicted ferredoxin	COG2768	COG2768, Uncharacterized Fe-S center protein	General function prediction only
NTHI1204	68249606	dmsD	twin-arginine leader-binding protein DmsD	COG3381	TorD, Uncharacterized component of anaerobic dehydrogenases	General function prediction only
NTHI1205	68249607	dmsC	anaerobic dimethyl sulfoxide reductase chain C	COG3302	DmsC, DMSO reductase anchor subunit	General function prediction only
NTHI1206	68249608	dmsB	anaerobic dimethyl sulfoxide reductase chain B	COG0437	HybA, Fe-S-cluster-containing hydrogenase components 1	Energy production & conversion
NTHI1207	68249609	dmsA	anaerobic dimethyl sulfoxide reductase chain A precursor	COG0243	BisC, Anaerobic dehydrogenases, typically selenocysteine-containing	Energy production & conversion
NTHI1208	68249610	---	hypothetical protein	COG1305	COG1305, Transglutaminase-like enzymes, putative cysteine proteases	Amino acid transport & metabolism
NTHI1209	68249611	---	putative mercuric transport protein MerT homolog	None	None	Function unknown
NTHI1211	68249612	copZ	predicted copper chaperone MerP homolog	COG2608	CopZ, Copper chaperone	Inorganic ion transport & metabolism
NTHI1212	68249613	mdlB	conserved hypothetical ABC transporter ATP-binding protein	COG1132	MdlB, ABC-type multidrug transport system, ATPase and permease components	Defense mechanisms
NTHI1213	68249614	---	conserved hypothetical transcriptional regulator	COG4977	COG4977, Transcriptional regulator containing an amidase domain and an AraC-type DNA-binding HTH domain	Transcription
NTHI1214	68249615	---	conserved putative gamma-carboxymuconolactone decarboxylase subunit	COG0599	COG0599, Uncharacterized homolog of gamma-carboxymuconolactone decarboxylase subunit	Function unknown
NTHI1215	68249616	---	hypothetical protein	COG3421	COG3421, Uncharacterized protein conserved in bacteria	Function unknown
NTHI1216	68249617	res	putative type III restriction-modification system HindVIP enzyme res	COG3421	COG3421, Uncharacterized protein conserved in bacteria	Function unknown
NTHI1219	68249618	rnhB	ribonuclease HII	COG0164	RnhB, Ribonuclease HII	DNA replication, recombination, & repair
NTHI1220	68249619	lpxB	lipid-A-disaccharide synthase	COG0763	LpxB, Lipid A disaccharide synthetase	Cell envelope biogenesis
NTHI1222	68249620	lpxA	UDP-N-acetylglucosamine acyltransferase	COG1043	LpxA, Acyl-	Secondary metabolite biosynthesis, transport, & catabolism
NTHI1223	68249621	fabZ	(3R)-hydroxymyristoyl-[acyl carrier protein] dehydratase	COG0764	FabA, 3-hydroxymyristoyl/3-hydroxydecanoyl-(acyl carrier protein) dehydratases	Lipid metabolism
NTHI1224	68249622	---	predicted PE--lipooligosaccharide phosphorylethanolamine transferase	COG2194	COG2194, Predicted membrane-associated, metal-dependent hydrolase	General function prediction only
NTHI1225	68249623	pyrH	uridylate kinase	COG0528	PyrH, Uridylate kinase	Nucleotide transport & metabolism
NTHI1226	68249624	nrfD	NrfD, formate-dependent nitrite reductase, membrane component	COG3301	NrfD, Formate-dependent nitrite reductase, membrane component	Inorganic ion transport & metabolism
NTHI1227	68249625	nrfC	NrfC, Fe-S-cluster-containing hydrogenase component 1	COG0437	HybA, Fe-S-cluster-containing hydrogenase components 1	Energy production & conversion
NTHI1229	68249626	nrfB	cytochrome c-type protein NrfB	None	None	Inorganic ion transport & metabolism
NTHI1230	68249627	nrfA	cytochrome c nitrite reductase	COG3303	NrfA, Formate-dependent nitrite reductase, periplasmic cytochrome c552 subunit	Inorganic ion transport & metabolism
NTHI1231	162000000	hrpA	ATP-dependent RNA helicase HrpA	COG1643	HrpA, HrpA-like helicases	DNA replication, recombination, & repair
NTHI1232	68249629	---	conserved putative small membrane protein	COG2363	COG2363, Uncharacterized small membrane protein	Function unknown
NTHI1233	68249630	---	conserved putative membrane protein	COG2707	COG2707, Predicted membrane protein	Function unknown
NTHI1235	68249631	cyoB	probable cytochrome oxidase subunit II	COG1294	AppB, Cytochrome bd-type quinol oxidase, subunit 2	Energy production & conversion
NTHI1236	68249632	cyoA	probable cytochrome oxidase subunit I	COG1271	CydA, Cytochrome bd-type quinol oxidase, subunit 1	Energy production & conversion
NTHI1238	68249633	pyrG	CTP synthetase	COG0504	PyrG, CTP synthase (UTP-ammonia lyase)	Nucleotide transport & metabolism
NTHI1240	68249634	pnuC	nicotinamide riboside transporter	COG3201	PnuC, Nicotinamide mononucleotide transporter	Coenzyme metabolism
NTHI1241	68249635	glnQ	probable amino-acid ABC transporter ATP-binding protein	COG1126	GlnQ, ABC-type polar amino acid transport system, ATPase component	Amino acid transport & metabolism
NTHI1242	68249636	hisM	probable amino-acid ABC transporter permease protein	COG0765	HisM, ABC-type amino acid transport system, permease component	Amino acid transport & metabolism
NTHI1243	68249637	hisJ	probable amino-acid ABC transporter binding protein	COG0834	HisJ, ABC-type amino acid transport/signal transduction systems, periplasmic component/domain	Amino acid transport & metabolism; Signal transduction
NTHI1244	68249638	murA	UDP-N-acetylglucosamine 1-carboxyvinyltransferase	COG0766	MurA, UDP-N-acetylglucosamine enolpyruvyl transferase	Cell envelope biogenesis
NTHI1245	68249639	---	predicted transcriptional regulator, BolA superfamily	COG5007	COG5007, Predicted transcriptional regulator, BolA superfamily	Transcription
NTHI1246	68249640	---	predicted NTP binding protein, contains STAS domain	COG3113	COG3113, Predicted NTP binding protein (contains STAS domain)	General function prediction only
NTHI1247	68249641	ttg2D	conserved ABC-type transport system protein	COG2854	Ttg2D, ABC-type transport system involved in resistance to organic solvents, auxiliary component	Secondary metabolite biosynthesis, transport, & catabolism
NTHI1248	68249642	ttg2C	conserved ABC-type transport system protein, periplasmic component	COG1463	Ttg2C, ABC-type transport system involved in resistance to organic solvents, periplasmic component	Secondary metabolite biosynthesis, transport, & catabolism
NTHI1249	68249643	ttg2B	conserved ABC-type transport system protein, permease component	COG0767	Ttg2B, ABC-type transport system involved in resistance to organic solvents, permease component	Secondary metabolite biosynthesis, transport, & catabolism
NTHI1250	68249644	ttg2A	conserved ABC-type transport system protein, ATPase component	COG1127	Ttg2A, ABC-type transport system involved in resistance to organic solvents, ATPase component	Secondary metabolite biosynthesis, transport, & catabolism
NTHI1251	68249645	sodA	superoxide dismutase	COG0605	SodA, Superoxide dismutase	Inorganic ion transport & metabolism
NTHI1253	68249646	ccmA	heme exporter protein A	COG4133	CcmA, ABC-type transport system involved in cytochrome c biogenesis, ATPase component	Posttranslational modification, protein turnover, chaperones
NTHI1254	68249647	ccmB	heme exporter protein B	COG2386	CcmB, ABC-type transport system involved in cytochrome c biogenesis, permease component	Posttranslational modification, protein turnover, chaperones
NTHI1255	68249648	ccmC	heme exporter protein C	COG0755	CcmC, ABC-type transport system involved in cytochrome c biogenesis, permease component	Posttranslational modification, protein turnover, chaperones
NTHI1256	68249649	ccmD	heme exporter protein D	COG3114	CcmD, Heme exporter protein D	Intracellular trafficking & secretion
NTHI1257	68249650	ccmE	cytochrome c-type biogenesis protein CcmE	COG2332	CcmE, Cytochrome c-type biogenesis protein CcmE	Posttranslational modification, protein turnover, chaperones
NTHI1258	68249651	ccmF	cytochrome c-type biogenesis protein CcmF	COG1138	CcmF, Cytochrome c biogenesis factor	Posttranslational modification, protein turnover, chaperones
NTHI1259	68249652	dsbE	thiol:disulfide interchange protein DsbE	COG0526	TrxA, Thiol-disulfide isomerase and thioredoxins	Posttranslational modification, protein turnover, chaperones; Energy production & conversion
NTHI1262	68249653	---	hypothetical protein	None	None	Function unknown
NTHI1263	68249654	---	hypothetical protein	None	None	Function unknown
NTHI1265	162000000	ligA	NAD-dependent DNA ligase LigA	COG0272	Lig, NAD-dependent DNA ligase (contains BRCT domain type II)	DNA replication, recombination, & repair
NTHI1266	68249656	zipA	cell division protein ZipA	COG3115	ZipA, Cell division protein	Cell division & chromosome partitioning
NTHI1268	68249657	cysZ	putative sulfate transport protein CysZ	COG2981	CysZ, Uncharacterized protein involved in cysteine biosynthesis	Amino acid transport & metabolism
NTHI1269	68249658	cysK	cysteine synthase	COG0031	CysK, Cysteine synthase	Amino acid transport & metabolism
NTHI1272	68249659	rfaF	ADP-heptose--lipooligosaccharide heptosyltransferase II	COG0859	RfaF, ADP-heptose:LPS heptosyltransferase	Cell envelope biogenesis
NTHI1273	68249660	xylR	Xylose operon regulatory protein	COG1609	PurR, Transcriptional regulators	Transcription
NTHI1274	68249661	nhaC	conserved hypothetical Na(+)/H(+) antiporter	COG1757	NhaC, Na+/H+ antiporter	Energy production & conversion
NTHI1275	68249662	aspC2	putative aspartate aminotransferase	COG1168	MalY, Bifunctional PLP-dependent enzyme with beta-cystathionase and maltose regulon repressor activities	Amino acid transport & metabolism
NTHI1276	68249663	xylA	xylose isomerase	COG2115	XylA, Xylose isomerase	Carbohydrate transport & metabolism
NTHI1277	68249664	xylB	xylulose kinase	COG1070	XylB, Sugar (pentulose and hexulose) kinases	Carbohydrate transport & metabolism
NTHI1278	68249665	rfaD	ADP-L-glycero-D-mannoheptose-6-epimerase	COG0451	WcaG, Nucleoside-diphosphate-sugar epimerases	Cell envelope biogenesis; Carbohydrate transport & metabolism
NTHI1279	68249666	trxA	thioredoxin-like protein	COG0526	TrxA, Thiol-disulfide isomerase and thioredoxins	Posttranslational modification, protein turnover, chaperones; Energy production & conversion
NTHI1280	68249667	deoC	deoxyribose-phosphate aldolase	COG0274	DeoC, Deoxyribose-phosphate aldolase	Nucleotide transport & metabolism
NTHI1282	68249668	comM	competence protein ComM	COG0606	COG0606, Predicted ATPase with chaperone activity	Posttranslational modification, protein turnover, chaperones
NTHI1283	68249669	engB	GTPase EngB	COG0218	COG0218, Predicted GTPase	General function prediction only
NTHI1285	68249670	virK	D-xylose transport permease protein	COG2990	VirK, Uncharacterized protein conserved in bacteria	Function unknown
NTHI1286	68249671	oppF	oligopeptide transport ATP-binding protein	COG4608	AppF, ABC-type oligopeptide transport system, ATPase component	Amino acid transport & metabolism
NTHI1287	68249672	oppD	oligopeptide transporter ATP-binding component	COG0444	DppD, ABC-type dipeptide/oligopeptide/nickel transport system, ATPase component	Amino acid transport & metabolism; Inorganic ion transport & metabolism
NTHI1288	68249673	oppC	oligopeptide transport system permease protein	COG1173	DppC, ABC-type dipeptide/oligopeptide/nickel transport systems, permease components	Amino acid transport & metabolism; Inorganic ion transport & metabolism
NTHI1289	68249674	oppB	oligopeptide transporter permease	COG0601	DppB, ABC-type dipeptide/oligopeptide/nickel transport systems, permease components	Amino acid transport & metabolism; Inorganic ion transport & metabolism
NTHI1292	68249675	oppA	periplasmic oligopeptide-binding protein	COG4166	OppA, ABC-type oligopeptide transport system, periplasmic component	Amino acid transport & metabolism
NTHI1293	68249676	talB	transaldolase B	COG0176	MipB, Transaldolase	Carbohydrate transport & metabolism
NTHI1295	68249677	cstA	carbon starvation protein, predicted membrane protein	COG1966	CstA, Carbon starvation protein, predicted membrane protein	Signal transduction
NTHI1296	68249678	mraZ	hypothetical protein	COG2001	COG2001, Uncharacterized protein conserved in bacteria	Function unknown
NTHI1297	68249679	mraW	S-adenosyl-methyltransferase MraW	COG0275	COG0275, Predicted S-adenosylmethionine-dependent methyltransferase involved in cell envelope biogenesis	Cell envelope biogenesis
NTHI1298	68249680	ftsL	cell division protein FtsL	COG3116	FtsL, Cell division protein	Cell division & chromosome partitioning
NTHI1299	68249681	ftsI	peptidoglycan synthetase FtsI	COG0768	FtsI, Cell division protein FtsI/penicillin-binding protein 2	Cell envelope biogenesis
NTHI1300	68249682	murE	UDP-N-acetylmuramoylalanyl-D-glutamate--2,6-diaminopimelate ligase	COG0769	MurE, UDP-N-acetylmuramyl tripeptide synthase	Cell envelope biogenesis
NTHI1301	68249683	murF	UDP-N-acetylmuramoyl-tripeptide--D-alanyl-D-alanine ligase	COG0770	MurF, UDP-N-acetylmuramyl pentapeptide synthase	Cell envelope biogenesis
NTHI1302	68249684	mraY	phospho-N-acetylmuramoyl-pentapeptide-transferase	COG0472	Rfe, UDP-N-acetylmuramyl pentapeptide phosphotransferase/UDP-N- acetylglucosamine-1-phosphate transferase	Cell envelope biogenesis
NTHI1303	68249685	murD	UDP-N-acetylmuramoyl-L-alanyl-D-glutamate synthetase	COG0771	MurD, UDP-N-acetylmuramoylalanine-D-glutamate ligase	Cell envelope biogenesis
NTHI1304	68249686	ftsW	Cell division protein FtsW	COG0772	FtsW, Bacterial cell division membrane protein	Cell division & chromosome partitioning
NTHI1305	68249687	murG	N-acetylglucosaminyl transferase	COG0707	MurG, UDP-N-acetylglucosamine:LPS N-acetylglucosamine transferase	Cell envelope biogenesis
NTHI1307	68249688	murC	UDP-N-acetylmuramate--L-alanine ligase	COG0773	MurC, UDP-N-acetylmuramate-alanine ligase	Cell envelope biogenesis
NTHI1308	68249689	ddl	D-alanine--D-alanine ligase	COG1181	DdlA, D-alanine-D-alanine ligase and related ATP-grasp enzymes	Cell envelope biogenesis
NTHI1309	68249690	ftsQ	cell division protein FtsQ	COG1589	FtsQ, Cell division septal protein	Cell envelope biogenesis
NTHI1310	68249691	ftsA	cell division protein FtsA	COG0849	FtsA, Actin-like ATPase involved in cell division	Cell division & chromosome partitioning
NTHI1311	68249692	ftsZ	cell division protein FtsZ	COG0206	FtsZ, Cell division GTPase	Cell division & chromosome partitioning
NTHI1312	68249693	lpxC	UDP-3-O-[3-hydroxymyristoyl] N-acetylglucosamine deacetylase	COG0774	LpxC, UDP-3-O-acyl-N-acetylglucosamine deacetylase	Cell envelope biogenesis
NTHI1313	68249694	pheA	P-protein	COG0077	PheA, Prephenate dehydratase	Amino acid transport & metabolism
NTHI1314	68249695	---	hypothetical protein	COG1660	COG1660, Predicted P-loop-containing kinase	General function prediction only
NTHI1315	68249696	ptsN	nitrogen regulatory IIA protein	COG1762	PtsN, Phosphotransferase system mannitol/fructose-specific IIA domain (Ntr-type)	Carbohydrate transport & metabolism; Signal transduction
NTHI1316	68249697	yhbG	probable ABC transporter ATP-binding protein	COG1137	YhbG, ABC-type (unclassified) transport system, ATPase component	General function prediction only
NTHI1317	68249698	---	hypothetical protein	COG1934	COG1934, Uncharacterized protein conserved in bacteria	Function unknown
NTHI1318	68249699	---	hypothetical protein	COG3117	COG3117, Uncharacterized protein conserved in bacteria	Function unknown
NTHI1319	68249700	---	hypothetical protein	COG3028	COG3028, Uncharacterized protein conserved in bacteria	Function unknown
NTHI1320	68249701	pmbA	PmbA	COG0312	TldD, Predicted Zn-dependent proteases and their inactivated homologs	General function prediction only
NTHI1321	68249702	hpt	hypoxanthine-guanine phosphoribosyltransferase	COG0634	Hpt, Hypoxanthine-guanine phosphoribosyltransferase	Nucleotide transport & metabolism
NTHI1323	68249703	---	predicted Na+/dicarboxylate symporter	COG1823	COG1823, Predicted Na+/dicarboxylate symporter	General function prediction only
NTHI1324	68249704	nrdG	anaerobic ribonucleotide reductase-activating protein	COG0602	NrdG, Organic radical activating enzymes	Posttranslational modification, protein turnover, chaperones
NTHI1325	68249705	cydC	cysteine/glutathione ABC transporter membrane/ATP-binding component	COG4987	CydC, ABC-type transport system involved in cytochrome bd biosynthesis, fused ATPase and permease components	Energy production & conversion; Posttranslational modification, protein turnover, chaperones
NTHI1326	68249706	cydD	cysteine/glutathione ABC transporter membrane/ATP-binding component	COG4988	CydD, ABC-type transport system involved in cytochrome bd biosynthesis, ATPase and permease components	Energy production & conversion; Posttranslational modification, protein turnover, chaperones
NTHI1327	68249707	trxB	thioredoxin reductase	COG0492	TrxB, Thioredoxin reductase	Posttranslational modification, protein turnover, chaperones
NTHI1328	68249708	---	thioredoxin domain-containing protein	COG3118	COG3118, Thioredoxin domain-containing protein	Posttranslational modification, protein turnover, chaperones
NTHI1329	68249709	hemH	ferrochelatase	COG0276	HemH, Protoheme ferro-lyase (ferrochelatase)	Coenzyme metabolism
NTHI1330	68249710	paaI	hypothetical protein	COG2050	PaaI, Uncharacterized protein, possibly involved in aromatic compounds catabolism	Secondary metabolite biosynthesis, transport, & catabolism
NTHI1331	68249711	glcD	conserved FAD/FMN-containing dehydrogenase	COG0277	GlcD, FAD/FMN-containing dehydrogenases	Energy production & conversion
NTHI1332	68249712	ompP5	Outer membrane protein P5	COG2885	OmpA, Outer membrane protein and related peptidoglycan-associated (lipo)proteins	Cell envelope biogenesis
NTHI1333	68249713	---	conserved glutaredoxin-related protein	COG0278	COG0278, Glutaredoxin-related protein	Posttranslational modification, protein turnover, chaperones
NTHI1334	68249714	hisC	histidinol-phosphate aminotransferase	COG0079	HisC, Histidinol-phosphate/aromatic aminotransferase and cobyric acid decarboxylase	Amino acid transport & metabolism
NTHI1335	68249715	serC	phosphoserine aminotransferase	COG1932	SerC, Phosphoserine aminotransferase	Amino acid transport & metabolism; Coenzyme metabolism
NTHI1336	68249716	---	hypothetical protein	COG2926	COG2926, Uncharacterized protein conserved in bacteria	Function unknown
NTHI1337	68249717	---	hypothetical protein	COG0115	IlvE, Branched-chain amino acid aminotransferase/4-amino-4-deoxychorismate lyase	Amino acid transport & metabolism; Coenzyme metabolism
NTHI1338	68249718	trpE	para-aminobenzoate synthase component I	COG0147	TrpE, Anthranilate/para-aminobenzoate synthases component I	Amino acid transport & metabolism; Coenzyme metabolism
NTHI1339	68249719	trpG2	para-aminobenzoate synthase component II	COG0512	PabA, Anthranilate/para-aminobenzoate synthases component II	Amino acid transport & metabolism; Coenzyme metabolism
NTHI1340	68249720	metK	S-adenosylmethionine synthetase	COG0192	MetK, S-adenosylmethionine synthetase	Coenzyme metabolism
NTHI1341	68249721	sprT	hypothetical protein	COG3091	SprT, Uncharacterized protein conserved in bacteria	Function unknown
NTHI1342	68249722	opa	opacity protein	COG3637	COG3637, Opacity protein and related surface antigens	Cell envelope biogenesis
NTHI1344	68249723	---	hypothetical protein	None	None	Function unknown
NTHI1345	68249724	artM	arginine transporter permease subunit ArtM	COG4160	ArtM, ABC-type arginine/histidine transport system, permease component	Amino acid transport & metabolism
NTHI1346	68249725	artQ	arginine transporter permease subunit ArtQ	COG4215	ArtQ, ABC-type arginine transport system, permease component	Amino acid transport & metabolism
NTHI1347	68249726	artI	arginine-binding periplasmic protein	COG0834	HisJ, ABC-type amino acid transport/signal transduction systems, periplasmic component/domain	Amino acid transport & metabolism; Signal transduction
NTHI1348	68249727	artP	arginine transporter ATP-binding subunit	COG4161	ArtP, ABC-type arginine transport system, ATPase component	Amino acid transport & metabolism
NTHI1350	68249728	gmhA	phosphoheptose isomerase	COG0279	GmhA, Phosphoheptose isomerase	Carbohydrate transport & metabolism
NTHI1352	68249729	ligA	DNA ligase	COG1793	CDC9, ATP-dependent DNA ligase	DNA replication, recombination, & repair
NTHI1353	68249730	dppF	dipeptide transporter ATP-binding subunit	COG4608	AppF, ABC-type oligopeptide transport system, ATPase component	Amino acid transport & metabolism
NTHI1354	68249731	dppD	dipeptide transporter ATP-binding subunit	COG0444	DppD, ABC-type dipeptide/oligopeptide/nickel transport system, ATPase component	Amino acid transport & metabolism; Inorganic ion transport & metabolism
NTHI1355	68249732	dppC	dipeptide transport system permease protein	COG1173	DppC, ABC-type dipeptide/oligopeptide/nickel transport systems, permease components	Amino acid transport & metabolism; Inorganic ion transport & metabolism
NTHI1357	68249733	dppB	dipeptide transport system permease protein	COG0601	DppB, ABC-type dipeptide/oligopeptide/nickel transport systems, permease components	Amino acid transport & metabolism; Inorganic ion transport & metabolism
NTHI1359	68249734	uvrD	DNA-dependent helicase II	COG0210	UvrD, Superfamily I DNA and RNA helicases	DNA replication, recombination, & repair
NTHI1360	68249735	---	predicted organic radical activating enzyme	COG0602	NrdG, Organic radical activating enzymes	Posttranslational modification, protein turnover, chaperones
NTHI1361	68249736	---	predicted 6-pyruvoyl-tetrahydropterin synthase	COG0720	COG0720, 6-pyruvoyl-tetrahydropterin synthase	Coenzyme metabolism
NTHI1362	68249737	---	predicted PP-loop superfamily ATPase	COG0603	COG0603, Predicted PP-loop superfamily ATPase	General function prediction only
NTHI1363	68249738	---	hypothetical protein	None	None	Function unknown
NTHI1364	68249739	---	branched-chain amino acid aminotransferase	COG0115	IlvE, Branched-chain amino acid aminotransferase/4-amino-4-deoxychorismate lyase	Amino acid transport & metabolism; Coenzyme metabolism
NTHI1365	68249740	gcvA	glycine cleavage system transcriptional activator	COG0583	LysR, Transcriptional regulator	Transcription
NTHI1366	68249741	---	predicted SAM-dependent methyltransferase	COG2933	COG2933, Predicted SAM-dependent methyltransferase	General function prediction only
NTHI1367	68249742	sucC	succinyl-CoA synthetase beta chain	COG0045	SucC, Succinyl-CoA synthetase, beta subunit	Energy production & conversion
NTHI1368	68249743	sucD	succinyl-CoA synthetase alpha chain	COG0074	SucD, Succinyl-CoA synthetase, alpha subunit	Energy production & conversion
NTHI1369	68249744	---	putative translation factor, SUA5	COG0009	SUA5, Putative translation factor (SUA5)	Translation, ribosomal structure & biogenesis
NTHI1370	68249745	rluB	ribosomal large subunit pseudouridine synthase B	COG1187	RsuA, 16S rRNA uridine-516 pseudouridylate synthase and related pseudouridylate synthases	Translation, ribosomal structure & biogenesis
NTHI1371	68249746	cysB	transcriptional regulator CysB	COG0583	LysR, Transcriptional regulator	Transcription
NTHI1372	68249747	---	N5-glutamine S-adenosyl-L-methionine-dependent methyltransferase	COG2890	HemK, Methylase of polypeptide chain release factors	Translation, ribosomal structure & biogenesis
NTHI1373	68249748	---	hypothetical protein	COG2840	COG2840, Uncharacterized protein conserved in bacteria	Function unknown
NTHI1374	68249749	pta	phosphate acetyltransferase	COG0280	Pta, Phosphotransacetylase	Energy production & conversion
NTHI1375	68249750	ackA	acetate kinase	COG0282	ackA, Acetate kinase	Energy production & conversion
NTHI1376	68249751	---	hypothetical protein	COG3092	COG3092, Uncharacterized protein conserved in bacteria	Function unknown
NTHI1377	68249752	cvpA	colicin V production protein	COG1286	CvpA, Uncharacterized membrane protein, required for colicin V production	General function prediction only
NTHI1378	68249753	purF	amidophosphoribosyltransferase	COG0034	PurF, Glutamine phosphoribosylpyrophosphate amidotransferase	Nucleotide transport & metabolism
NTHI1379	68249754	sulA	cell division inhibitor SulA	COG1090	COG1090, Predicted nucleoside-diphosphate sugar epimerase	General function prediction only
NTHI1380	68249755	argR	arginine repressor	COG1438	ArgR, Arginine repressor	Transcription
NTHI1381	68249756	mdh	malate dehydrogenase	COG0039	Mdh, Malate/lactate dehydrogenases	Energy production & conversion
NTHI1382	68249757	lysS	lysyl-tRNA synthetase	COG1190	LysU, Lysyl-tRNA synthetase (class II)	Translation, ribosomal structure & biogenesis
NTHI1383	68249758	prfB	peptide chain release factor 2	COG1186	PrfB, Protein chain release factor B	Translation, ribosomal structure & biogenesis
NTHI1384	68249759	dsbC	thiol:disulfide interchange protein DsbC	COG1651	DsbG, Protein-disulfide isomerase	Posttranslational modification, protein turnover, chaperones
NTHI1385	68249760	recJ	single-stranded-DNA-specific exonuclease RecJ	COG0608	RecJ, Single-stranded DNA-specific exonuclease	DNA replication, recombination, & repair
NTHI1387	68249761	dsbG	hypothetical protein	COG1651	DsbG, Protein-disulfide isomerase	Posttranslational modification, protein turnover, chaperones
NTHI1389	68249762	mtnA	5'-methylthioadenosine/S-adenosylhomocysteine nucleosidase	COG0775	Pfs, Nucleoside phosphorylase	Nucleotide transport & metabolism
NTHI1390	68249763	hup	heme utilization protein	COG1629	CirA, Outer membrane receptor proteins, mostly Fe transport	Inorganic ion transport & metabolism
NTHI1391	68249764	---	putative L-lactate permease	COG1620	LldP, L-lactate permease	Energy production & conversion
NTHI1394	68249765	fbp	fructose-1,6-bisphosphatase	COG0158	Fbp, Fructose-1,6-bisphosphatase	Carbohydrate transport & metabolism
NTHI1395	68249766	truA	tRNA pseudouridine synthase A	COG0101	TruA, Pseudouridylate synthase	Translation, ribosomal structure & biogenesis
NTHI1396	68249767	sapZ	predicted membrane protein	COG2855	COG2855, Predicted membrane protein	Function unknown
NTHI1397	68249768	sapF	ABC-type transport system, ATPase component	COG4167	SapF, ABC-type antimicrobial peptide transport system, ATPase component	Defense mechanisms
NTHI1398	68249769	sapD	ABC-type transport system, ATP binding component	COG4170	SapD, ABC-type antimicrobial peptide transport system, ATPase component	Defense mechanisms
NTHI1399	68249770	sapC	ABC-type transport system, permease protein	COG4171	SapC, ABC-type antimicrobial peptide transport system, permease component	Defense mechanisms
NTHI1400	68249771	sapB	ABC-type transport system, permease protein	COG4168	SapB, ABC-type antimicrobial peptide transport system, permease component	Defense mechanisms
NTHI1401	68249772	sapA	ABC-type transport system, periplasmic component	COG4166	OppA, ABC-type oligopeptide transport system, periplasmic component	Amino acid transport & metabolism
NTHI1402	68249773	---	predicted ATPase	COG3106	COG3106, Predicted ATPase	General function prediction only
NTHI1403	68249774	ppc	phosphoenolpyruvate carboxylase	COG2352	Ppc, Phosphoenolpyruvate carboxylase	Energy production & conversion
NTHI1404	68249775	purR	HTH-type transcriptional repressor PurR	COG1609	PurR, Transcriptional regulators	Transcription
NTHI1406	162000000	dapD	2,3,4,5-tetrahydropyridine-2-carboxylate N-succinyltransferase	COG2171	DapD, Tetrahydrodipicolinate N-succinyltransferase	Amino acid transport & metabolism
NTHI1407	68249777	purA	adenylosuccinate synthetase	COG0104	PurA, Adenylosuccinate synthase	Nucleotide transport & metabolism
NTHI1408	68249778	lysC	predicted aspartokinase	COG0527	LysC, Aspartokinases	Amino acid transport & metabolism
NTHI1410	68249779	rplY	50S ribosomal protein L25	COG1825	RplY, Ribosomal protein L25 (general stress protein Ctc)	Translation, ribosomal structure & biogenesis
NTHI1412	68249780	dedA	uncharacterized membrane-associated protein	COG0586	DedA, Uncharacterized membrane-associated protein	Function unknown
NTHI1413	68249781	---	hypothetical protein	COG3105	COG3105, Uncharacterized protein conserved in bacteria	Function unknown
NTHI1414	68249782	---	putative translation initiation inhibitor, YjgF family	COG0251	TdcF, Putative translation initiation inhibitor, yjgF family	Translation, ribosomal structure & biogenesis
NTHI1415	68249783	---	hypothetical protein	None	None	Function unknown
NTHI1416	68249784	---	hypothetical protein	COG0790	COG0790, FOG: TPR repeat, SEL1 subfamily	General function prediction only
NTHI1417	68249785	---	HTH-type transcriptional regulator	COG0789	SoxR, Predicted transcriptional regulators	Transcription
NTHI1418	68249786	---	putative ABC-type Co2+ transport system, periplasmic component	COG5266	CbiK, ABC-type Co2+ transport system, periplasmic component	Inorganic ion transport & metabolism
NTHI1419	68249787	---	hypothetical protein	None	None	Function unknown
NTHI1420	68249788	cbiM	cobalt transport protein CbiM	COG0310	CbiM, ABC-type Co2+ transport system, permease component	Inorganic ion transport & metabolism
NTHI1421	68249789	---	predicted cobalt transport protein	COG0619	CbiQ, ABC-type cobalt transport system, permease component CbiQ and related transporters	Inorganic ion transport & metabolism
NTHI1422	68249790	cbiO	predicted ABC-type cobalt transport system, ATPase component	COG1122	CbiO, ABC-type cobalt transport system, ATPase component	Inorganic ion transport & metabolism
NTHI1423	68249791	aspC	aromatic amino acid aminotransferase	COG1448	TyrB, Aspartate/tyrosine/aromatic aminotransferase	Amino acid transport & metabolism
NTHI1424	68249792	purK	phosphoribosylaminoimidazole carboxylase ATPase subunit	COG0026	PurK, Phosphoribosylaminoimidazole carboxylase (NCAIR synthetase)	Nucleotide transport & metabolism
NTHI1425	68249793	purE	phosphoribosylaminoimidazole carboxylase catalytic subunit	COG0041	PurE, Phosphoribosylcarboxyaminoimidazole (NCAIR) mutase	Nucleotide transport & metabolism
NTHI1426	68249794	hicA	HicA	None	None	Function unknown
NTHI1427	68249795	hicB	HicB	COG4226	HicB, Uncharacterized protein encoded in hypervariable junctions of pilus gene clusters	Function unknown
NTHI1428	68249796	pepN	aminopeptidase N	COG0308	PepN, Aminopeptidase N	Amino acid transport & metabolism
NTHI1429	68249797	ribE	riboflavin synthase subunit alpha	COG0307	RibC, Riboflavin synthase alpha chain	Coenzyme metabolism
NTHI1430	68249798	norM	multidrug efflux protein	COG0534	NorM, Na+-driven multidrug efflux pump	Defense mechanisms
NTHI1431	68249799	sfsA	sugar fermentation stimulation protein A	COG1489	SfsA, DNA-binding protein, stimulates sugar fermentation	General function prediction only
NTHI1432	68249800	tyrS	tyrosyl-tRNA synthetase	COG0162	TyrS, Tyrosyl-tRNA synthetase	Translation, ribosomal structure & biogenesis
NTHI1433	68249801	prsA	ribose-phosphate pyrophosphokinase	COG0462	PrsA, Phosphoribosylpyrophosphate synthetase	Nucleotide transport & metabolism; Amino acid transport & metabolism
NTHI1434	68249802	ispE	4-diphosphocytidyl-2-C-methyl-D-erythritol kinase	COG1947	IspE, 4-diphosphocytidyl-2C-methyl-D-erythritol 2-phosphate synthase	Lipid metabolism
NTHI1435	68249803	lolB	outer membrane lipoprotein LolB	COG3017	LolB, Outer membrane lipoprotein involved in outer membrane biogenesis	Cell envelope biogenesis
NTHI1436	68249804	cca	multifunctional tRNA nucleotidyl transferase/2'3'-cyclic phosphodiesterase/2'nucleotidase/phosphatase	COG0617	PcnB, tRNA nucleotidyltransferase/poly(A) polymerase	Translation, ribosomal structure & biogenesis
NTHI1437	68249805	---	hypothetical protein	COG3103	COG3103, SH3 domain protein	Signal transduction
NTHI1438	68249806	---	putative phosphate permease	COG0306	PitA, Phosphate/sulphate permeases	Inorganic ion transport & metabolism
NTHI1439	68249807	---	conserved hypothetical phosphate transport regulator	COG1392	COG1392, Phosphate transport regulator (distant homolog of PhoU)	Inorganic ion transport & metabolism
NTHI1440	68249808	---	predicted membrane protein	COG2259	COG2259, Predicted membrane protein	Function unknown
NTHI1441	68249809	---	hypothetical protein	COG3767	COG3767, Uncharacterized low-complexity protein	Function unknown
NTHI1443	68249810	---	hypothetical protein	COG3220	COG3220, Uncharacterized protein conserved in bacteria	Function unknown
NTHI1444	68249811	---	hypothetical protein	COG3219	COG3219, Uncharacterized protein conserved in bacteria	Function unknown
NTHI1445	68249812	---	hypothetical protein	None	None	Function unknown
NTHI1446	68249813	---	hypothetical protein	None	None	Function unknown
NTHI1447	68249814	---	hypothetical protein	None	None	Function unknown
NTHI1448	68249815	hmw2C	HMW2C, putative glycosyltransferase involved in glycosylation of HMW1A and HMW2A	COG3914	Spy, Predicted O-linked N-acetylglucosamine transferase, SPINDLY family	Posttranslational modification, protein turnover, chaperones
NTHI1449	68249816	hmw2B	HMW2B, OMP-85-like protein required for HMW1A and HMW2A secretion	COG2831	FhaC, Hemolysin activation/secretion protein	Intracellular trafficking & secretion
NTHI1450	68249817	hmw2A	HMW2A, high molecular weight adhesin 2	COG2982	AsmA, Uncharacterized protein involved in outer membrane biogenesis	Cell envelope biogenesis
NTHI1451	68249818	---	hypothetical protein	COG3025	COG3025, Uncharacterized conserved protein	Function unknown
NTHI1453	68249819	radA	DNA repair protein RadA	COG1066	Sms, Predicted ATP-dependent serine protease	Posttranslational modification, protein turnover, chaperones
NTHI1454	162000000	lrp	leucine-responsive transcriptional regulator	COG1522	Lrp, Transcriptional regulators	Transcription
NTHI1455	68249821	ftsK	DNA translocase FtsK	COG1674	FtsK, DNA segregation ATPase FtsK/SpoIIIE and related proteins	Cell division & chromosome partitioning
NTHI1456	68249822	lolA	outer-membrane lipoprotein carrier protein	COG2834	LolA, Outer membrane lipoprotein-sorting protein	Cell envelope biogenesis
NTHI1458	68249823	---	recombination factor protein RarA	COG2256	MGS1, ATPase related to the helicase subunit of the Holliday junction resolvase	DNA replication, recombination, & repair
NTHI1459	68249824	---	hypothetical protein	None	None	Function unknown
NTHI1460	68249825	---	modification methylase BepI-like	COG0270	Dcm, Site-specific DNA methylase	DNA replication, recombination, & repair
NTHI1462	68249826	aroA	3-phosphoshikimate 1-carboxyvinyltransferase	COG0128	AroA, 5-enolpyruvylshikimate-3-phosphate synthase	Amino acid transport & metabolism
NTHI1463	68249827	purU	formyltetrahydrofolate deformylase	COG0788	PurU, Formyltetrahydrofolate hydrolase	Nucleotide transport & metabolism
NTHI1464	68249828	hns	DNA-binding protein H-NS homolog	COG2916	Hns, DNA-binding protein H-NS	General function prediction only
NTHI1465	68249829	---	predicted Na+/H+ antiporter	COG1757	NhaC, Na+/H+ antiporter	Energy production & conversion
NTHI1466	68249830	---	hypothetical protein	None	None	Function unknown
NTHI1468	68249831	ilvI	acetolactate synthase 3 catalytic subunit	COG0028	IlvB, Thiamine pyrophosphate-requiring enzymes [acetolactate synthase, pyruvate dehydrogenase (cytochrome), glyoxylate carboligase, phosphonopyruvate decarboxylase]	Amino acid transport & metabolism; Coenzyme metabolism
NTHI1469	68249832	ilvH	acetolactate synthase 3 regulatory subunit	COG0440	IlvH, Acetolactate synthase, small (regulatory) subunit	Amino acid transport & metabolism
NTHI1470	68249833	argS	arginyl-tRNA synthetase	COG0018	ArgS, Arginyl-tRNA synthetase	Translation, ribosomal structure & biogenesis
NTHI1471	68249834	---	hypothetical protein	COG3102	COG3102, Uncharacterized protein conserved in bacteria	Function unknown
NTHI1472	68249835	---	hypothetical lipoprotein	None	None	Function unknown
NTHI1473	68249836	pcp	Outer membrane lipoprotein PCP precursor	COG3133	SlyB, Outer membrane lipoprotein	Cell envelope biogenesis
NTHI1474	68249837	lgtD	UDP-glcNAc--lipooligosaccharide N-acetylglucosamine glycosyltransferase	COG0463	WcaA, Glycosyltransferases involved in cell wall biogenesis	Cell envelope biogenesis
NTHI1475	162000000	pgi	glucose-6-phosphate isomerase	COG0166	Pgi, Glucose-6-phosphate isomerase	Carbohydrate transport & metabolism
NTHI1476	68249839	alr	alanine racemase	COG0787	Alr, Alanine racemase	Cell envelope biogenesis
NTHI1477	68249840	dnaB	replicative DNA helicase	COG0305	DnaB, Replicative DNA helicase	DNA replication, recombination, & repair
NTHI1479	68249841	pykA	pyruvate kinase	COG0469	PykF, Pyruvate kinase	Carbohydrate transport & metabolism
NTHI1480	68249842	---	prophage CP4-57-like integrase	COG0582	XerC, Integrase	DNA replication, recombination, & repair
NTHI1482	68249843	---	hypothetical protein	None	None	Function unknown
NTHI1483	68249844	---	hypothetical protein	None	None	Function unknown
NTHI1484	68249845	---	hypothetical protein	None	None	Function unknown
NTHI1485	68249846	---	hypothetical protein	None	None	Function unknown
NTHI1486	68249847	---	hypothetical protein	None	None	Function unknown
NTHI1487	68249848	---	modification methylase Bsp6I-like	COG0270	Dcm, Site-specific DNA methylase	DNA replication, recombination, & repair
NTHI1488	68249849	rdgC	recombination associated protein	COG2974	RdgC, DNA recombination-dependent growth factor C	DNA replication, recombination, & repair
NTHI1489	68249850	---	hypothetical protein	COG5243	HRD1, HRD ubiquitin ligase complex, ER membrane component	Posttranslational modification, protein turnover, chaperones
NTHI1490	68249851	ssb3	Single-strand binding protein	COG0629	Ssb, Single-stranded DNA-binding protein	DNA replication, recombination, & repair
NTHI1491	68249852	---	hypothetical protein	None	None	Function unknown
NTHI1492	68249853	---	predicted recombinational DNA repair protein, RecE pathway	COG3723	RecT, Recombinational DNA repair protein (RecE pathway)	DNA replication, recombination, & repair
NTHI1493	68249854	---	hypothetical protein	None	None	Function unknown
NTHI1494	68249855	---	hypothetical protein	None	None	Function unknown
NTHI1495	68249856	---	modification methylase DpnIIB-like	COG0863	COG0863, DNA modification methylase	DNA replication, recombination, & repair
NTHI1497	68249857	---	hypothetical protein	None	None	Function unknown
NTHI1498	68249858	---	hypothetical protein	None	None	Function unknown
NTHI1499	68249859	---	hypothetical protein	None	None	Function unknown
NTHI1501	68249860	---	hypothetical protein	None	None	Function unknown
NTHI1502	68249861	---	hypothetical protein	COG4748	COG4748, Uncharacterized conserved protein	Function unknown
NTHI1503	68249862	---	hypothetical protein	None	None	Function unknown
NTHI1504	68249863	---	hypothetical protein	COG1595	RpoE, DNA-directed RNA polymerase specialized sigma subunit, sigma24 homolog	Transcription
NTHI1505	68249864	---	hypothetical protein	None	None	Function unknown
NTHI1507	68249865	---	hypothetical protein	COG1724	COG1724, Predicted periplasmic or secreted lipoprotein	Cell motility & secretion
NTHI1508	68249866	---	hypothetical protein	None	None	Function unknown
NTHI1509	68249867	---	hypothetical protein	None	None	Function unknown
NTHI1510	68249868	---	hypothetical protein	None	None	Function unknown
NTHI1511	68249869	---	hypothetical protein	None	None	Function unknown
NTHI1512	68249870	---	hypothetical protein	None	None	Function unknown
NTHI1513	68249871	---	hypothetical protein	None	None	Function unknown
NTHI1515	68249872	---	hypothetical protein	None	None	Function unknown
NTHI1516	68249873	---	hypothetical protein	COG4197	COG4197, Uncharacterized protein conserved in bacteria, prophage-related	Function unknown
NTHI1517	68249874	---	hypothetical protein	COG2932	COG2932, Predicted transcriptional regulator	Transcription
NTHI1518	68249875	---	hypothetical protein	None	None	Function unknown
NTHI1519	68249876	---	hypothetical protein	None	None	Function unknown
NTHI1520	68249877	---	hypothetical protein	None	None	Function unknown
NTHI1521	68249878	---	hypothetical protein	None	None	Function unknown
NTHI1522	68249879	---	hypothetical protein	COG1475	Spo0J, Predicted transcriptional regulators	Transcription
NTHI1523	68249880	---	predicted DNA modification methylase	None	None	Function unknown
NTHI1525	68249881	---	hypothetical protein	None	None	Function unknown
NTHI1526	68249882	---	hypothetical protein	COG2197	CitB, Response regulator containing a CheY-like receiver domain and an HTH DNA-binding domain	Translation, ribosomal structure & biogenesis
NTHI1527	68249883	---	predicted phage terminase large subunit	COG1783	XtmB, Phage terminase large subunit	General function prediction only
NTHI1528	68249884	---	hypothetical protein	COG3567	COG3567, Uncharacterized protein conserved in bacteria	Function unknown
NTHI1529	68249885	---	uncharacterized protein, homolog of phage Mu protein gp30	COG2369	COG2369, Uncharacterized protein, homolog of phage Mu protein gp30	Function unknown
NTHI1530	68249886	---	hypothetical protein	COG3566	COG3566, Uncharacterized protein conserved in bacteria	Function unknown
NTHI1531	68249887	---	hypothetical protein	None	None	Function unknown
NTHI1532	68249888	---	hypothetical protein	COG4834	COG4834, Uncharacterized protein conserved in bacteria	Function unknown
NTHI1533	68249889	---	hypothetical protein	None	None	Function unknown
NTHI1534	68249890	---	hypothetical protein	None	None	Function unknown
NTHI1535	68249891	---	hypothetical protein	None	None	Function unknown
NTHI1536	68249892	---	hypothetical protein	None	None	Function unknown
NTHI1537	68249893	---	hypothetical protein	None	None	Function unknown
NTHI1538	68249894	---	hypothetical protein	None	None	Function unknown
NTHI1539	68249895	---	hypothetical protein	None	None	Function unknown
NTHI1540	68249896	---	hypothetical protein	None	None	Function unknown
NTHI1541	68249897	---	hypothetical protein	None	None	Function unknown
NTHI1542	68249898	---	predicted phage-related minor tail protein	COG5281	COG5281, Phage-related minor tail protein	Function unknown
NTHI1543	68249899	---	hypothetical protein	None	None	Function unknown
NTHI1544	68249900	---	hypothetical protein	None	None	Function unknown
NTHI1546	68249901	---	hypothetical protein	None	None	Function unknown
NTHI1547	68249902	---	hypothetical protein	None	None	Function unknown
NTHI1548	68249903	---	hypothetical protein	COG4384	COG4384, Mu-like prophage protein gp45	Function unknown
NTHI1549	68249904	---	hypothetical protein	None	None	Function unknown
NTHI1550	68249905	---	hypothetical protein	COG3299	XkdT, Uncharacterized homolog of phage Mu protein gp47	Function unknown
NTHI1551	68249906	---	hypothetical protein	None	None	Function unknown
NTHI1552	68249907	---	probable tail fiber protein	None	None	Function unknown
NTHI1553	68249908	---	hypothetical protein	None	None	Function unknown
NTHI1554	68249909	---	hypothetical protein	None	None	Function unknown
NTHI1555	68249910	---	hypothetical protein	None	None	Function unknown
NTHI1556	68249911	---	hypothetical protein	None	None	Function unknown
NTHI1560	68249912	---	hypothetical protein	None	None	Function unknown
NTHI1561	68249913	---	Mu-like prophage protein gp29	COG4383	COG4383, Mu-like prophage protein gp29	Function unknown
NTHI1562	68249914	---	hypothetical protein	None	None	Function unknown
NTHI1563	68249915	---	hypothetical protein	None	None	Function unknown
NTHI1564	68249916	---	hypothetical protein	COG3101	COG3101, Uncharacterized protein conserved in bacteria	Function unknown
NTHI1565	68249917	---	hypothetical protein	COG0790	COG0790, FOG: TPR repeat, SEL1 subfamily	General function prediction only
NTHI1566	68249918	---	hypothetical protein	None	None	Function unknown
NTHI1567	68249919	---	hypothetical protein	COG0790	COG0790, FOG: TPR repeat, SEL1 subfamily	General function prediction only
NTHI1568	68249920	---	hypothetical protein	None	None	Function unknown
NTHI1569	68249921	---	hypothetical protein	COG0790	COG0790, FOG: TPR repeat, SEL1 subfamily	General function prediction only
NTHI1570	68249922	---	hypothetical protein	None	None	Function unknown
NTHI1571	68249923	---	hypothetical protein	COG0790	COG0790, FOG: TPR repeat, SEL1 subfamily	General function prediction only
NTHI1572	68249924	prfA	peptide chain release factor 1	COG0216	PrfA, Protein chain release factor A	Translation, ribosomal structure & biogenesis
NTHI1573	68249925	---	hypothetical protein	COG1714	COG1714, Predicted membrane protein/domain	Function unknown
NTHI1574	68249926	hemK	HemK	COG2890	HemK, Methylase of polypeptide chain release factors	Translation, ribosomal structure & biogenesis
NTHI1575	68249927	---	hypothetical protein	COG2912	COG2912, Uncharacterized conserved protein	Function unknown
NTHI1576	68249928	kdsA	2-dehydro-3-deoxyphosphooctonate aldolase	COG2877	KdsA, 3-deoxy-D-manno-octulosonic acid (KDO) 8-phosphate synthase	Cell envelope biogenesis
NTHI1577	68249929	---	glycerate dehydrogenase	COG1052	LdhA, Lactate dehydrogenase and related dehydrogenases	Energy production & conversion; Coenzyme metabolism
NTHI1578	68249930	lolC	lipoprotein releasing system transmembrane protein	COG4591	LolE, ABC-type transport system, involved in lipoprotein release, permease component	Cell envelope biogenesis
NTHI1579	68249931	bioA	adenosylmethionine--8-amino-7-oxononanoate transaminase	COG0161	BioA, Adenosylmethionine-8-amino-7-oxononanoate aminotransferase	Coenzyme metabolism
NTHI1580	68249932	bioF	8-amino-7-oxononanoate synthase	COG0156	BioF, 7-keto-8-aminopelargonate synthetase and related enzymes	Coenzyme metabolism
NTHI1581	68249933	---	hypothetical protein	COG2830	COG2830, Uncharacterized protein conserved in bacteria	Function unknown
NTHI1582	68249934	bioC	putative biotin synthesis protein BioC	COG2226	UbiE, Methylase involved in ubiquinone/menaquinone biosynthesis	Coenzyme metabolism
NTHI1583	68249935	bioD	dithiobiotin synthetase	COG0132	BioD, Dethiobiotin synthetase	Coenzyme metabolism
NTHI1585	68249936	lolD	lipoprotein releasing system ATP-binding protein LolD	COG1136	SalX, ABC-type antimicrobial peptide transport system, ATPase component	Defense mechanisms
NTHI1586	68249937	lolE	outer membrane-specific lipoprotein transporter subunit LolE	COG4591	LolE, ABC-type transport system, involved in lipoprotein release, permease component	Cell envelope biogenesis
NTHI1587	68249938	aroG	phospho-2-dehydro-3-heoxyheptonate aldolase	COG0722	AroG, 3-deoxy-D-arabino-heptulosonate 7-phosphate (DAHP) synthase	Amino acid transport & metabolism
NTHI1588	68249939	impA	ImpA	COG1974	LexA, SOS-response transcriptional repressors (RecA-mediated autopeptidases)	Translation, ribosomal structure & biogenesis
NTHI1589	68249940	---	predicted Na+/serine symporter	COG3633	SstT, Na+/serine symporter	Amino acid transport & metabolism
NTHI1590	68249941	---	putative NAD(P)H oxidoreductase	COG2249	MdaB, Putative NADPH-quinone reductase (modulator of drug activity B)	General function prediction only
NTHI1591	68249942	---	predicted component of anaerobic dehydrogenase	COG3381	TorD, Uncharacterized component of anaerobic dehydrogenases	General function prediction only
NTHI1592	68249943	---	predicted nitroreductase	COG0778	NfnB, Nitroreductase	Energy production & conversion
NTHI1593	68249944	sppA	protease IV	COG0616	SppA, Periplasmic serine proteases (ClpP class)	Posttranslational modification, protein turnover, chaperones; Intracellular trafficking & secretion
NTHI1594	68249945	licD	phosphorylcholine transferase	COG3475	COG3475, LPS biosynthesis protein	Cell envelope biogenesis
NTHI1595	68249946	licC	LicC	COG4750	LicC, CTP:phosphocholine cytidylyltransferase involved in choline phosphorylation for cell surface LPS epitopes	Cell envelope biogenesis
NTHI1596	68249947	licB	LicB	COG2510	COG2510, Predicted membrane protein	Cell envelope biogenesis
NTHI1597	68249948	licA	LicA	COG0510	CotS, Predicted choline kinase involved in LPS biosynthesis	Cell envelope biogenesis
NTHI1599	68249949	mnmC	5-methylaminomethyl-2-thiouridine methyltransferase	COG4121	COG4121, Uncharacterized conserved protein	Function unknown
NTHI1600	68249950	fabB	3-oxoacyl-(acyl carrier protein) synthase I	COG0304	FabB, 3-oxoacyl-(acyl-carrier-protein) synthase	Lipid metabolism; Secondary metabolite biosynthesis, transport, & catabolism
NTHI1601	68249951	grxA	glutaredoxin 1	COG0695	GrxC, Glutaredoxin and related proteins	Posttranslational modification, protein turnover, chaperones
NTHI1602	68249952	rimK	probable ribosomal protein S6 modification protein	COG0189	RimK, Glutathione synthase/Ribosomal protein S6 modification enzyme (glutaminyl transferase)	Coenzyme metabolism; Translation, ribosomal structure & biogenesis
NTHI1603	68249953	gltS	Sodium/glutamate symport carrier protein	COG0786	GltS, Na+/glutamate symporter	Amino acid transport & metabolism
NTHI1604	68249954	parC	DNA topoisomerase IV subunit A	COG0188	GyrA, Type IIA topoisomerase (DNA gyrase/topo II, topoisomerase IV), A subunit	DNA replication, recombination, & repair
NTHI1605	68249955	parE	DNA topoisomerase IV subunit B	COG0187	GyrB, Type IIA topoisomerase (DNA gyrase/topo II, topoisomerase IV), B subunit	DNA replication, recombination, & repair
NTHI1606	68249956	htrB	lipid A biosynthesis lauroyl acyltransferase	COG1560	HtrB, Lauroyl/myristoyl acyltransferase	Cell envelope biogenesis
NTHI1607	68249957	rfaE	bifunctional heptose 7-phosphate kinase/heptose 1-phosphate adenyltransferase	COG2870	RfaE, ADP-heptose synthase, bifunctional sugar kinase/adenylyltransferase	Cell envelope biogenesis
NTHI1611	68249958	---	hypothetical protein	None	None	Function unknown
NTHI1612	68249959	uupA2	ABC transporter ATP-binding protein	COG0488	Uup, ATPase components of ABC transporters with duplicated ATPase domains	General function prediction only
NTHI1613	68249960	uppB	ABC transporter ATP-binding protein	COG0488	Uup, ATPase components of ABC transporters with duplicated ATPase domains	General function prediction only
NTHI1614	68249961	---	putative carbonic anhydrase	COG0288	CynT, Carbonic anhydrase	Inorganic ion transport & metabolism
NTHI1615	162000000	asnC	asparaginyl-tRNA synthetase	COG0017	AsnS, Aspartyl/asparaginyl-tRNA synthetases	Translation, ribosomal structure & biogenesis
NTHI1616	68249963	ribH	riboflavin synthase subunit beta	COG0054	RibH, Riboflavin synthase beta-chain	Coenzyme metabolism
NTHI1617	68249964	nusB	transcription antitermination protein NusB	COG0781	NusB, Transcription termination factor	Transcription
NTHI1618	68249965	thiL	thiamine-monophosphate kinase	COG0611	ThiL, Thiamine monophosphate kinase	Coenzyme metabolism
NTHI1619	68249966	pgpA	phosphatidylglycerophosphatase A	COG1267	PgpA, Phosphatidylglycerophosphatase A and related proteins	Lipid metabolism
NTHI1620	68249967	---	predicted threonine efflux protein	COG1280	RhtB, Putative threonine efflux protein	Amino acid transport & metabolism
NTHI1621	68249968	dapB	dihydrodipicolinate reductase	COG0289	DapB, Dihydrodipicolinate reductase	Amino acid transport & metabolism
NTHI1622	68249969	---	conserved hypothetical ferredoxin-like protein	COG0633	Fdx, Ferredoxin	Energy production & conversion
NTHI1623	68249970	---	hypothetical protein	None	None	Function unknown
NTHI1624	68249971	pheS	phenylalanyl-tRNA synthetase subunit alpha	COG0016	PheS, Phenylalanyl-tRNA synthetase alpha subunit	Translation, ribosomal structure & biogenesis
NTHI1625	68249972	pheT	phenylalanyl-tRNA synthetase subunit beta	COG0072	PheT, Phenylalanyl-tRNA synthetase beta subunit	Translation, ribosomal structure & biogenesis
NTHI1626	68249973	himA	integration host factor alpha-subunit	COG0776	HimA, Bacterial nucleoid DNA-binding protein	DNA replication, recombination, & repair
NTHI1627	68249974	---	conserved hypothetical lipoprotein	COG0791	Spr, Cell wall-associated hydrolases (invasion-associated proteins)	Cell envelope biogenesis
NTHI1628	68249975	---	hypothetical protein	COG2378	COG2378, Predicted transcriptional regulator	Transcription
NTHI1629	68249976	---	putative 5'(3')-deoxyribonucleotidase	COG4502	COG4502, Uncharacterized protein conserved in bacteria	Function unknown
NTHI1630	68249977	---	NAD-dependent deacetylase	COG0846	SIR2, NAD-dependent protein deacetylases, SIR2 family	Transcription
NTHI1631	68249978	---	hypothetical protein	COG3943	COG3943, Virulence protein	General function prediction only
NTHI1632	68249979	ftsK2	DNA translocase FtsK	COG1674	FtsK, DNA segregation ATPase FtsK/SpoIIIE and related proteins	Cell division & chromosome partitioning
NTHI1634	68249980	---	NAD-dependent deacetylase sirtuin 5	COG0846	SIR2, NAD-dependent protein deacetylases, SIR2 family	Transcription
NTHI1635	68249981	---	hypothetical protein	COG0631	PTC1, Serine/threonine protein phosphatase	Signal transduction
NTHI1636	68249982	---	hypothetical protein	None	None	Function unknown
NTHI1637	68249983	---	hypothetical protein	None	None	Function unknown
NTHI1638	68249984	---	predicted serine/threonine protein phosphatase family protein	COG0464	SpoVK, ATPases of the AAA+ class	Posttranslational modification, protein turnover, chaperones
NTHI1639	68249985	---	predicted arylsulfatase A-like enzyme	COG3119	AslA, Arylsulfatase A and related enzymes	Inorganic ion transport & metabolism
NTHI1640	68249986	---	predicted enzyme related to aldose 1-epimerase	COG0676	COG0676, Uncharacterized enzymes related to aldose 1-epimerase	Carbohydrate transport & metabolism
NTHI1641	68249987	infC	translation initiation factor IF-3	COG0290	InfC, Translation initiation factor 3 (IF-3)	Translation, ribosomal structure & biogenesis
NTHI1642	162000000	rpmI	50S ribosomal protein L35	COG0291	RpmI, Ribosomal protein L35	Translation, ribosomal structure & biogenesis
NTHI1643	68249989	rplT	50S ribosomal protein L20	COG0292	RplT, Ribosomal protein L20	Translation, ribosomal structure & biogenesis
NTHI1644	68249990	recB	exodeoxyribonuclease V beta chain	COG1074	RecB, ATP-dependent exoDNAse (exonuclease V) beta subunit (contains helicase and exonuclease domains)	DNA replication, recombination, & repair
NTHI1646	68249991	recD	exodeoxyribonuclease V alpha chain	COG0507	RecD, ATP-dependent exoDNAse (exonuclease V), alpha subunit - helicase superfamily I member	DNA replication, recombination, & repair
NTHI1647	68249992	---	hypothetical protein	COG3120	COG3120, Uncharacterized protein conserved in bacteria	Function unknown
NTHI1648	68249993	lonB	putative protease La homolog, predicted ATP-dependent protease	COG1067	LonB, Predicted ATP-dependent protease	Posttranslational modification, protein turnover, chaperones
NTHI1649	68249994	fabA	3-hydroxydecanoyl-(acyl carrier protein) dehydratase	COG0764	FabA, 3-hydroxymyristoyl/3-hydroxydecanoyl-(acyl carrier protein) dehydratases	Lipid metabolism
NTHI1650	68249995	---	hypothetical protein	None	None	Function unknown
NTHI1651	68249996	---	hypothetical protein	None	None	Function unknown
NTHI1652	68249997	rpsO	30S ribosomal protein S15	COG0184	RpsO, Ribosomal protein S15P/S13E	Translation, ribosomal structure & biogenesis
NTHI1653	68249998	---	conserved hypothetical transposase-like protein	COG3676	COG3676, Transposase and inactivated derivatives	DNA replication, recombination, & repair
NTHI1654	68249999	---	hypothetical protein	None	None	Function unknown
NTHI1655	68250000	dacB	D-alanyl-D-alanine carboxypeptidase/endopeptidase	COG2027	DacB, D-alanyl-D-alanine carboxypeptidase (penicillin-binding protein 4)	Cell envelope biogenesis
NTHI1658	68250001	greA	transcription elongation factor GreA	COG0782	GreA, Transcription elongation factor	Transcription
NTHI1659	68250002	---	predicted RNA-binding protein containing KH domain, possibly ribosomal protein	COG1534	COG1534, Predicted RNA-binding protein containing KH domain, possibly ribosomal protein	Translation, ribosomal structure & biogenesis
NTHI1660	68250003	rrmJ	23S rRNA methyltransferase J	COG0293	FtsJ, 23S rRNA methylase	Translation, ribosomal structure & biogenesis
NTHI1662	68250004	ftsH	cell division protein FtsH homolog 1	COG0465	HflB, ATP-dependent Zn proteases	Posttranslational modification, protein turnover, chaperones
NTHI1663	68250005	folP	dihydropteroate synthase	COG0294	FolP, Dihydropteroate synthase and related enzymes	Coenzyme metabolism
NTHI1664	68250006	mrsA	predicted phosphomannomutase	COG1109	{ManB}, Phosphomannomutase	Carbohydrate transport & metabolism
NTHI1666	68250007	sixA	phosphohistidine phosphatase SixA homolog	COG2062	SixA, Phosphohistidine phosphatase SixA	Signal transduction
NTHI1667	68250008	---	hypothetical protein	None	None	Function unknown
NTHI1668	68250009	---	hypothetical protein	COG1538	TolC, Outer membrane protein	Cell envelope biogenesis; Intracellular trafficking & secretion
NTHI1669	68250010	---	hypothetical protein	None	None	Function unknown
NTHI1671	68250011	---	hypothetical protein	None	None	Function unknown
NTHI1673	68250012	---	RNA polymerase sigma factor	COG1595	RpoE, DNA-directed RNA polymerase specialized sigma subunit, sigma24 homolog	Transcription
NTHI1674	68250013	---	hypothetical protein	None	None	Function unknown
NTHI1675	68250014	---	hypothetical protein	COG0697	RhaT, Permeases of the drug/metabolite transporter (DMT) superfamily	Amino acid transport & metabolism; Carbohydrate transport & metabolism
NTHI1677	68250015	msaB	bifunctional methionine sulfoxide reductase A/B protein	COG0229	COG0229, Conserved domain frequently associated with peptide methionine sulfoxide reductase	Posttranslational modification, protein turnover, chaperones
NTHI1678	68250016	---	conserved hypothetical cytochrome c-type biogenesis protein	COG0785	CcdA, Cytochrome c biogenesis protein	Posttranslational modification, protein turnover, chaperones
NTHI1679	68250017	---	hypothetical protein	COG0526	TrxA, Thiol-disulfide isomerase and thioredoxins	Posttranslational modification, protein turnover, chaperones; Energy production & conversion
NTHI1680	68250018	---	dsDNA-mimic protein	COG3099	COG3099, Uncharacterized protein conserved in bacteria	Function unknown
NTHI1681	68250019	moeB	molybdopterin biosynthesis protein MoeB	COG0476	ThiF, Dinucleotide-utilizing enzymes involved in molybdopterin and thiamine biosynthesis family 2	Coenzyme metabolism
NTHI1682	68250020	moeA	molybdopterin biosynthesis protein MoeA	COG0303	MoeA, Molybdopterin biosynthesis enzyme	Coenzyme metabolism
NTHI1683	68250021	folE	GTP cyclohydrolase I	COG0302	FolE, GTP cyclohydrolase I	Coenzyme metabolism
NTHI1684	68250022	---	hypothetical protein	COG3100	COG3100, Uncharacterized protein conserved in bacteria	Function unknown
NTHI1685	68250023	bioD	dithiobiotin synthetase	COG0132	BioD, Dethiobiotin synthetase	Coenzyme metabolism
NTHI1686	68250024	metF	5,10-methylenetetrahydrofolate reductase	COG0685	MetF, 5,10-methylenetetrahydrofolate reductase	Amino acid transport & metabolism
NTHI1687	68250025	rplM	50S ribosomal protein L13	COG0102	RplM, Ribosomal protein L13	Translation, ribosomal structure & biogenesis
NTHI1688	68250026	rpsI	30S ribosomal protein S9	COG0103	RpsI, Ribosomal protein S9	Translation, ribosomal structure & biogenesis
NTHI1689	68250027	sspA	stringent starvation protein A	COG0625	Gst, Glutathione S-transferase	Posttranslational modification, protein turnover, chaperones
NTHI1690	68250028	sspB	ClpXP protease specificity-enhancing factor	COG2969	SspB, Stringent starvation protein B	General function prediction only
NTHI1691	68250029	dxs	1-deoxy-D-xylulose-5-phosphate synthase	COG1154	Dxs, Deoxyxylulose-5-phosphate synthase	Coenzyme metabolism; Lipid metabolism
NTHI1692	68250030	ispA	geranyltranstransferase	COG0142	IspA, Geranylgeranyl pyrophosphate synthase	Coenzyme metabolism
NTHI1693	68250031	xseB	exodeoxyribonuclease VII small subunit	COG1722	XseB, Exonuclease VII small subunit	DNA replication, recombination, & repair
NTHI1694	68250032	thiI	thiamine biosynthesis protein ThiI	COG0301	ThiI, Thiamine biosynthesis ATP pyrophosphatase	Coenzyme metabolism
NTHI1695	68250033	---	hypothetical protein	COG3098	COG3098, Uncharacterized protein conserved in bacteria	Function unknown
NTHI1696	68250034	truC	tRNA pseudouridine synthase C	COG0564	RluA, Pseudouridylate synthases, 23S RNA-specific	Translation, ribosomal structure & biogenesis
NTHI1697	68250035	---	hypothetical protein	COG3140	COG3140, Uncharacterized protein conserved in bacteria	Function unknown
NTHI1698	68250036	cspD	cold shock-like protein CspD	COG1278	CspC, Cold shock proteins	Transcription
NTHI1699	68250037	---	hypothetical protein	COG2606	EbsC, Uncharacterized conserved protein	Function unknown
NTHI1700	68250038	usg	aspartate-semialdehyde dehydrogenase	COG0136	Asd, Aspartate-semialdehyde dehydrogenase	Amino acid transport & metabolism
NTHI1701	68250039	trpA	tryptophan synthase subunit alpha	COG0159	TrpA, Tryptophan synthase alpha chain	Amino acid transport & metabolism
NTHI1702	68250040	trpB	tryptophan synthase subunit beta	COG0133	TrpB, Tryptophan synthase beta chain	Amino acid transport & metabolism
NTHI1703	68250041	---	conserved hypothetical oxidoreductase	COG4221	COG4221, Short-chain alcohol dehydrogenase of unknown specificity	General function prediction only
NTHI1704	68250042	purM	phosphoribosylaminoimidazole synthetase	COG0150	PurM, Phosphoribosylaminoimidazole (AIR) synthetase	Nucleotide transport & metabolism
NTHI1706	68250043	purN	phosphoribosylglycinamide formyltransferase	COG0299	PurN, Folate-dependent phosphoribosylglycinamide formyltransferase PurN	Nucleotide transport & metabolism
NTHI1707	68250044	---	predicted ABC-type transport system protein, periplasmic component	COG5266	CbiK, ABC-type Co2+ transport system, periplasmic component	Inorganic ion transport & metabolism
NTHI1708	162000000	uspE	universal stress protein UspE	COG0589	UspA, Universal stress protein UspA and related nucleotide-binding proteins	Signal transduction
NTHI1709	68250046	fnr	fumarate/nitrate reduction transcriptional regulator	COG0664	Crp, cAMP-binding proteins - catabolite gene activator and regulatory subunit of cAMP-dependent protein kinases	Signal transduction
NTHI1711	68250047	---	putative integrase/recombinase	None	None	Function unknown
NTHI1712	68250048	---	hypothetical protein	None	None	Function unknown
NTHI1713	68250049	---	predicted phage anti-repressor protein	COG3561	COG3561, Phage anti-repressor protein	Transcription
NTHI1714	68250050	---	hypothetical protein	COG1196	Smc, Chromosome segregation ATPases	Cell division & chromosome partitioning
NTHI1715	68250051	---	hypothetical protein	None	None	Function unknown
NTHI1716	68250052	---	hypothetical protein	None	None	Function unknown
NTHI1717	68250053	---	hypothetical protein	None	None	Function unknown
NTHI1718	68250054	---	hypothetical protein	None	None	Function unknown
NTHI1719	68250055	---	hypothetical protein	None	None	Function unknown
NTHI1720	68250056	---	predicted transcriptional regulator	COG2932	COG2932, Predicted transcriptional regulator	Transcription
NTHI1721	68250057	---	hypothetical protein	COG4197	COG4197, Uncharacterized protein conserved in bacteria, prophage-related	Function unknown
NTHI1722	68250058	---	hypothetical protein	None	None	Function unknown
NTHI1723	68250059	---	hypothetical protein	COG3645	COG3645, Uncharacterized phage-encoded protein	Function unknown
NTHI1724	68250060	---	hypothetical protein	None	None	Function unknown
NTHI1725	68250061	---	hypothetical protein	None	None	Function unknown
NTHI1726	68250062	---	hypothetical protein	None	None	Function unknown
NTHI1727	68250063	ninB	putative recombination protein NinB	None	None	Function unknown
NTHI1728_1	68250064	ninG	putative recombination protein NinG homolog	None	None	Function unknown
NTHI1729	68250065	---	hypothetical protein	None	None	Function unknown
NTHI1730	68250066	---	hypothetical protein	None	None	Function unknown
NTHI1731	68250067	---	hypothetical protein	None	None	Function unknown
NTHI1733	68250068	---	hypothetical protein	COG3617	COG3617, Prophage antirepressor	Transcription
NTHI1734	68250069	---	hypothetical protein	None	None	Function unknown
NTHI1735	68250070	---	hypothetical protein	None	None	Function unknown
NTHI1736	68250071	---	hypothetical protein	COG3179	COG3179, Predicted chitinase	General function prediction only
NTHI1737	68250072	---	hypothetical protein	None	None	Function unknown
NTHI1738	68250073	---	hypothetical protein	None	None	Function unknown
NTHI1739	68250074	---	hypothetical protein	COG1709	COG1709, Predicted transcriptional regulator	Transcription
NTHI1740	68250075	---	hypothetical protein	COG3728	XtmA, Phage terminase, small subunit	DNA replication, recombination, & repair
NTHI1741	68250076	---	predicted phage terminase large subunit	COG1783	XtmB, Phage terminase large subunit	General function prediction only
NTHI1742	68250077	---	hypothetical protein	COG3567	COG3567, Uncharacterized protein conserved in bacteria	Function unknown
NTHI1743	68250078	traN	uncharacterized protein, homolog of phage Mu protein gp30	COG2369	COG2369, Uncharacterized protein, homolog of phage Mu protein gp30	Function unknown
NTHI1744	68250079	---	hypothetical protein	COG3566	COG3566, Uncharacterized protein conserved in bacteria	Function unknown
NTHI1745	68250080	pyrD	dihydroorotate dehydrogenase 2	COG0167	PyrD, Dihydroorotate dehydrogenase	Nucleotide transport & metabolism
NTHI1746	68250081	trpH	TrpH	COG0613	COG0613, Predicted metal-dependent phosphoesterases (PHP family)	General function prediction only
NTHI1748	68250082	---	hypothetical protein	None	None	Function unknown
NTHI1749	68250083	fumC	fumarate hydratase	COG0114	FumC, Fumarase	Energy production & conversion
NTHI1750	68250084	---	putative glycosyl transferase, glycosyl transferase family 8 protein	COG1442	RfaJ, Lipopolysaccharide biosynthesis proteins, LPS:glycosyltransferases	Cell envelope biogenesis
NTHI1753	68250085	holC	DNA polymerase III subunit chi	COG2927	HolC, DNA polymerase III, chi subunit	DNA replication, recombination, & repair
NTHI1754	68250086	---	hypothetical protein	None	None	Function unknown
NTHI1755	68250087	---	hypothetical protein	COG4185	COG4185, Uncharacterized protein conserved in bacteria	Function unknown
NTHI1756	68250088	---	hypothetical protein	COG4185	COG4185, Uncharacterized protein conserved in bacteria	Function unknown
NTHI1757	68250089	---	hypothetical protein	COG3097	COG3097, Uncharacterized protein conserved in bacteria	Function unknown
NTHI1758	68250090	---	hypothetical protein	None	None	Function unknown
NTHI1760	68250091	valS	valyl-tRNA synthetase	COG0525	ValS, Valyl-tRNA synthetase	Translation, ribosomal structure & biogenesis
NTHI1762	68250092	---	hypothetical protein	None	None	Function unknown
NTHI1763	68250093	trpC	bifunctional indole-3-glycerol phosphate synthase/phosphoribosylanthranilate isomerase	COG0134	TrpC, Indole-3-glycerol phosphate synthase	Amino acid transport & metabolism
NTHI1764	68250094	trpD	anthranilate phosphoribosyltransferase	COG0547	TrpD, Anthranilate phosphoribosyltransferase	Amino acid transport & metabolism
NTHI1765	68250095	---	hypothetical protein	None	None	Function unknown
NTHI1767	68250096	trpG	anthranilate synthase component II	COG0512	PabA, Anthranilate/para-aminobenzoate synthases component II	Amino acid transport & metabolism; Coenzyme metabolism
NTHI1768	68250097	trpE	anthranilate synthase component I	COG0147	TrpE, Anthranilate/para-aminobenzoate synthases component I	Amino acid transport & metabolism; Coenzyme metabolism
NTHI1772	68250098	ftnB	ferritin like protein 2	COG1528	Ftn, Ferritin-like protein	Inorganic ion transport & metabolism
NTHI1773	68250099	ftnA	ferritin like protein 1	COG1528	Ftn, Ferritin-like protein	Inorganic ion transport & metabolism
NTHI1774	68250100	pstS	phosphate-binding periplasmic protein precursor PstS	COG0226	PstS, ABC-type phosphate transport system, periplasmic component	Inorganic ion transport & metabolism
NTHI1775	68250101	pstC	phosphate transport system permease protein PstC	COG0573	PstC, ABC-type phosphate transport system, permease component	Inorganic ion transport & metabolism
NTHI1776	68250102	pstA	phosphate transport system permease protein PstA	COG0581	PstA, ABC-type phosphate transport system, permease component	Inorganic ion transport & metabolism
NTHI1777	68250103	pstB	phosphate import ATP-binding protein PstB	COG1117	PstB, ABC-type phosphate transport system, ATPase component	Inorganic ion transport & metabolism
NTHI1778	68250104	phoB	phosphate regulon transcriptional regulatory protein PhoB	COG0745	OmpR, Response regulators consisting of a CheY-like receiver domain and a winged-helix DNA-binding domain	Translation, ribosomal structure & biogenesis
NTHI1779	68250105	phoR	phosphate regulon sensor protein PhoR	COG5002	VicK, Signal transduction histidine kinase	Signal transduction
NTHI1780	68250106	sbcB	exonuclease I	COG2925	SbcB, Exonuclease I	DNA replication, recombination, & repair
NTHI1781	68250107	---	hypothetical protein	None	None	Function unknown
NTHI1782	68250108	---	hypothetical protein	COG3586	COG3586, Uncharacterized conserved protein	Function unknown
NTHI1784	68250109	mukB	cell division protein MukB	COG3096	MukB, Uncharacterized protein involved in chromosome partitioning	Cell division & chromosome partitioning
NTHI1785	68250110	---	condesin subunit E	COG3095	MukE, Uncharacterized protein involved in chromosome partitioning	Cell division & chromosome partitioning
NTHI1786	68250111	haeIIR	type II restriction enzyme HaeII	None	None	Function unknown
NTHI1787	68250112	haeIIM	modification methylase HaeII	COG0270	Dcm, Site-specific DNA methylase	DNA replication, recombination, & repair
NTHI1788	68250113	mukF	condesin subunit F	COG3006	MukF, Uncharacterized protein involved in chromosome partitioning	Cell division & chromosome partitioning
NTHI1789	68250114	---	predicted ATPase of the PP-loop superfamily implicated in cell cycle control	COG0037	MesJ, Predicted ATPase of the PP-loop superfamily implicated in cell cycle control	Cell division & chromosome partitioning
NTHI1790	68250115	---	predicted dissimilatory sulfite reductase, desulfoviridin, gamma subunit	COG2920	DsrC, Dissimilatory sulfite reductase (desulfoviridin), gamma subunit	Inorganic ion transport & metabolism
NTHI1793	68250116	mop	probable molybdenum-pterin binding protein	COG3585	MopI, Molybdopterin-binding protein	Coenzyme metabolism
NTHI1796	68250117	pqqL	probable zinc protease	COG0612	PqqL, Predicted Zn-dependent peptidases	General function prediction only
NTHI1797	68250118	thrS	threonyl-tRNA synthetase	COG0441	ThrS, Threonyl-tRNA synthetase	Translation, ribosomal structure & biogenesis
NTHI1798	68250119	acpD	probable acyl carrier protein phosphodiesterase	COG1182	AcpD, Acyl carrier protein phosphodiesterase	Lipid metabolism
NTHI1799	68250120	topA	DNA topoisomerase I	COG0550	TopA, Topoisomerase IA	DNA replication, recombination, & repair
NTHI1800	68250121	---	putative HTH-type transcriptional regulator	COG0583	LysR, Transcriptional regulator	Transcription
NTHI1801	68250122	pntB	pyridine nucleotide transhydrogenase	COG1282	PntB, NAD/NADP transhydrogenase beta subunit	Energy production & conversion
NTHI1802	68250123	pntA	NAD(P) transhydrogenase subunit alpha	COG3288	PntA, NAD/NADP transhydrogenase alpha subunit	Energy production & conversion
NTHI1803	68250124	glgP	glycogen phosphorylase	COG0058	GlgP, Glucan phosphorylase	Carbohydrate transport & metabolism
NTHI1806	68250125	glgA	glycogen synthase	COG0297	GlgA, Glycogen synthase	Carbohydrate transport & metabolism
NTHI1807	68250126	glgC	glucose-1-phosphate adenylyltransferase	COG0448	GlgC, ADP-glucose pyrophosphorylase	Carbohydrate transport & metabolism
NTHI1808	68250127	glgX	glycogen operon protein GlgX	COG1523	PulA, Type II secretory pathway, pullulanase PulA and related glycosidases	Carbohydrate transport & metabolism
NTHI1809	68250128	glgB	glycogen branching enzyme	COG0296	GlgB, 1,4-alpha-glucan branching enzyme	Carbohydrate transport & metabolism
NTHI1810	68250129	malQ	4-alpha-glucanotransferase	COG1640	MalQ, 4-alpha-glucanotransferase	Carbohydrate transport & metabolism
NTHI1811	68250130	---	hypothetical protein	COG2983	COG2983, Uncharacterized conserved protein	Function unknown
NTHI1812	68250131	glnS	glutaminyl-tRNA synthetase	COG0008	GlnS, Glutamyl- and glutaminyl-tRNA synthetases	Translation, ribosomal structure & biogenesis
NTHI1813	68250132	cafA	ribonuclease G	COG1530	CafA, Ribonucleases G and E	Translation, ribosomal structure & biogenesis
NTHI1814	68250133	putP	sodium/proline symporter	COG0591	PutP, Na+/proline symporter	Amino acid transport & metabolism
NTHI1815	68250134	---	hypothetical protein	COG2230	Cfa, Cyclopropane fatty acid synthase and related methyltransferases	Cell envelope biogenesis
NTHI1816	68250135	cdd	cytidine deaminase	COG0295	Cdd, Cytidine deaminase	Nucleotide transport & metabolism
NTHI1817	68250136	---	conserved hypothetical DNA-binding ferritin-like protein	COG0783	Dps, DNA-binding ferritin-like protein (oxidative damage protectant)	Inorganic ion transport & metabolism
NTHI1818	68250137	pepT	peptidase T	COG2195	PepD, Di- and tripeptidases	Amino acid transport & metabolism
NTHI1820	68250138	potA	putrescine/spermidine ABC transporter ATPase protein	COG3842	PotA, ABC-type spermidine/putrescine transport systems, ATPase components	Amino acid transport & metabolism
NTHI1821	68250139	potB	spermidine/putrescine ABC transporter membrane protein	COG1176	PotB, ABC-type spermidine/putrescine transport system, permease component I	Amino acid transport & metabolism
NTHI1822	68250140	potC	spermidine/putrescine ABC transporter membrane protein	COG1177	PotC, ABC-type spermidine/putrescine transport system, permease component II	Amino acid transport & metabolism
NTHI1823	68250141	potD1	spermidine/putrescine-binding periplasmic protein 1 precursor	COG0687	PotD, Spermidine/putrescine-binding periplasmic protein	Amino acid transport & metabolism
NTHI1824	68250142	uupA	ABC transporter ATPase component	COG0488	Uup, ATPase components of ABC transporters with duplicated ATPase domains	General function prediction only
NTHI1825	68250143	---	deoxyguanosinetriphosphate triphosphohydrolase-like protein	COG0232	Dgt, dGTP triphosphohydrolase	Nucleotide transport & metabolism
NTHI1826	68250144	---	putative effector of murein hydrolase	COG1346	LrgB, Putative effector of murein hydrolase	Cell envelope biogenesis
NTHI1827	68250145	---	hypothetical protein	COG1380	COG1380, Putative effector of murein hydrolase LrgA	General function prediction only
NTHI1828	68250146	---	predicted micrococcal nuclease-like protein	COG1525	COG1525, Micrococcal nuclease (thermonuclease) homologs	DNA replication, recombination, & repair
NTHI1829	68250147	nifS	predicted selenocysteine lyase	COG0520	CsdB, Selenocysteine lyase	Amino acid transport & metabolism
NTHI1830	68250148	---	predicted SufE protein probably involved in Fe-S center assembly	COG2166	COG2166, SufE protein probably involved in Fe-S center assembly	General function prediction only
NTHI1831	68250149	---	Zn-ribbon-containing, possibly nucleic-acid-binding protein	COG5595	COG5595, Zn-ribbon-containing, possibly nucleic-acid-binding protein	General function prediction only
NTHI1832	68250150	queF	7-cyano-7-deazaguanine reductase	COG2904	COG2904, Uncharacterized protein conserved in bacteria	Function unknown
NTHI1833	68250151	tyrA	bifunctional chorismate mutase/prephenate dehydrogenase	COG0287	TyrA, Prephenate dehydrogenase	Amino acid transport & metabolism
NTHI1834	68250152	truB	tRNA pseudouridine synthase B	COG0130	TruB, Pseudouridine synthase	Translation, ribosomal structure & biogenesis
NTHI1835	68250153	rbfA	ribosome-binding factor A	COG0858	RbfA, Ribosome-binding factor A	Translation, ribosomal structure & biogenesis
NTHI1838	68250154	hsdM3	putative type I restriction enzyme HindVIIP M protein	COG0286	HsdM, Type I restriction-modification system methyltransferase subunit	Defense mechanisms
NTHI1839	68250155	hsdS3	putative type I restriction enzyme HindVIIP specificity protein	COG0732	HsdS, Restriction endonuclease S subunits	Defense mechanisms
NTHI1841	68250156	---	hypothetical protein	COG0846	SIR2, NAD-dependent protein deacetylases, SIR2 family	Transcription
NTHI1843	68250157	hsdR3	putative type I restriction enzyme HindVIIP R protein	COG0610	COG0610, Type I site-specific restriction-modification system, R (restriction) subunit and related helicases	Defense mechanisms
NTHI1844	68250158	infB	translation initiation factor IF-2	COG0532	InfB, Translation initiation factor 2 (IF-2; GTPase)	Translation, ribosomal structure & biogenesis
NTHI1845	68250159	nusA	transcription elongation factor NusA	COG0195	NusA, Transcription elongation factor	Transcription
NTHI1846	68250160	---	hypothetical protein	COG0779	COG0779, Uncharacterized protein conserved in bacteria	Function unknown
NTHI1849	68250161	---	hypothetical protein	None	None	Function unknown
NTHI1850	68250162	---	hypothetical protein	None	None	Function unknown
NTHI1851	68250163	---	hypothetical protein	None	None	Function unknown
NTHI1852	68250164	---	hypothetical protein	None	None	Function unknown
NTHI1853	68250165	---	hypothetical protein	None	None	Function unknown
NTHI1855	68250166	---	hypothetical protein	None	None	Function unknown
NTHI1856	68250167	---	hypothetical protein	None	None	Function unknown
NTHI1857	68250168	---	probable tail fiber protein	COG5301	COG5301, Phage-related tail fibre protein	General function prediction only
NTHI1858	68250169	---	predicted bacteriophage P2-related tail formation protein gpI	COG4385	gpI, Bacteriophage P2-related tail formation protein	General function prediction only
NTHI1860	68250170	---	predicted phage-related baseplate assembly protein	COG3948	COG3948, Phage-related baseplate assembly protein	General function prediction only
NTHI1861	68250171	---	predicted baseplate assembly protein W	COG3628	COG3628, Phage baseplate assembly protein W	General function prediction only
NTHI1862	68250172	---	predicted phage P2-like baseplate assembly protein	COG4540	gpV, Phage P2 baseplate assembly protein gpV	General function prediction only
NTHI1863	68250173	---	hypothetical protein	None	None	Function unknown
NTHI1864	68250174	---	hypothetical protein	None	None	Function unknown
NTHI1865	68250175	---	hypothetical protein	None	None	Function unknown
NTHI1866	68250176	---	hypothetical protein	None	None	Function unknown
NTHI1867	68250177	---	predicted phage-related tail protein	COG5283	COG5283, Phage-related tail protein	Function unknown
NTHI1869	68250178	---	hypothetical protein	COG5283	COG5283, Phage-related tail protein	Function unknown
NTHI1870	68250179	---	hypothetical protein	None	None	Function unknown
NTHI1871	68250180	---	hypothetical protein	None	None	Function unknown
NTHI1872	68250181	---	hypothetical protein	None	None	Function unknown
NTHI1873	68250182	---	probable bacteriophage tail completion protein gpS homolog	None	None	Function unknown
NTHI1874	68250183	---	probable bacteriophage tail completion protein gpR homolog	None	None	Function unknown
NTHI1875	68250184	---	hypothetical protein	None	None	Function unknown
NTHI1876	68250185	---	hypothetical protein	None	None	Function unknown
NTHI1878	68250186	---	DnaK suppressor protein, bacteriophage PSP3 gp34 homolog	COG1734	DksA, DnaK suppressor protein	Signal transduction
NTHI1879	68250187	---	hypothetical protein	None	None	Function unknown
NTHI1880	68250188	---	predicted phage-related lysozyme	COG3772	COG3772, Phage-related lysozyme (muraminidase)	General function prediction only
NTHI1881	68250189	---	hypothetical protein	None	None	Function unknown
NTHI1882	68250190	---	hypothetical protein	COG5004	COG5004, P2-like prophage tail protein X	General function prediction only
NTHI1883	68250191	---	hypothetical protein	None	None	Function unknown
NTHI1884	68250192	---	predicted terminase, endonuclease subunit	None	None	Function unknown
NTHI1885	68250193	---	predicted major capsid protein	None	None	Function unknown
NTHI1887	68250194	---	predicted capsid scaffolding protein	None	None	Function unknown
NTHI1888	68250195	---	terminase, ATPase subunit	COG5484	COG5484, Uncharacterized conserved protein	Function unknown
NTHI1890	68250196	---	predicted portal vertex protein	COG5518	COG5518, Bacteriophage capsid portal protein	General function prediction only
NTHI1891	68250197	siaB	acylneuraminate cytidylyltransferase	COG1083	NeuA, CMP-N-acetylneuraminic acid synthetase	Cell envelope biogenesis
NTHI1892	68250198	---	putative NAD(P)H nitroreductase	COG0778	NfnB, Nitroreductase	Energy production & conversion
NTHI1893	162000000	mrp	putative ATPase	COG0489	Mrp, ATPases involved in chromosome partitioning	Cell division & chromosome partitioning
NTHI1894	68250200	metG	methionyl-tRNA synthetase	COG0143	MetG, Methionyl-tRNA synthetase	Translation, ribosomal structure & biogenesis
NTHI1895	68250201	tehB	tellurite resistance protein TehB	COG3615	TehB, Uncharacterized protein/domain, possibly involved in tellurite resistance	Inorganic ion transport & metabolism
NTHI1896	68250202	gloB	probable hydroxyacylglutathione hydrolase	COG0491	GloB, Zn-dependent hydrolases, including glyoxylases	General function prediction only
NTHI1897	68250203	---	hypothetical protein	COG2242	CobL, Precorrin-6B methylase 2	Coenzyme metabolism
NTHI1898	68250204	---	hypothetical protein	None	None	Function unknown
NTHI1899	68250205	---	hypothetical protein	COG1944	COG1944, Uncharacterized conserved protein	Function unknown
NTHI1900	68250206	gyrA	DNA gyrase subunit A	COG0188	GyrA, Type IIA topoisomerase (DNA gyrase/topo II, topoisomerase IV), A subunit	DNA replication, recombination, & repair
NTHI1901	68250207	metX	homoserine O-acetyltransferase	COG2021	MET2, Homoserine acetyltransferase	Amino acid transport & metabolism
NTHI1902	68250208	sanA	SanA	COG2949	SanA, Uncharacterized membrane protein	Function unknown
NTHI1903	68250209	folC	folylpolyglutamate synthase	COG0285	FolC, Folylpolyglutamate synthase	Coenzyme metabolism
NTHI1904	68250210	accD	acetyl-CoA carboxylase subunit beta	COG0777	AccD, Acetyl-CoA carboxylase beta subunit	Lipid metabolism
NTHI1905	68250211	htoA	probable periplasmic serine protease do/HhoA-like precursor	COG0265	DegQ, Trypsin-like serine proteases, typically periplasmic, contain C-terminal PDZ domain	Posttranslational modification, protein turnover, chaperones
NTHI1906	68250212	mfd	transcription-repair coupling factor	COG1197	Mfd, Transcription-repair coupling factor (superfamily II helicase)	Translation, ribosomal structure & biogenesis
NTHI1907	68250213	---	hypothetical protein	None	None	Function unknown
NTHI1908	68250214	---	predicted P-loop ATPase fused to an acetyltransferase	COG1444	COG1444, Predicted P-loop ATPase fused to an acetyltransferase	General function prediction only
NTHI1910	68250215	---	hypothetical protein	COG3094	COG3094, Uncharacterized protein conserved in bacteria	Function unknown
NTHI1911	68250216	---	putative ABC transporter ATP-binding protein	COG0488	Uup, ATPase components of ABC transporters with duplicated ATPase domains	General function prediction only
NTHI1912	68250217	---	predicted plasmid maintenance system antidote protein	COG3093	VapI, Plasmid maintenance system antidote protein	General function prediction only
NTHI1913	68250218	---	predicted plasmid maintenance system killer protein	COG3549	HigB, Plasmid maintenance system killer protein	General function prediction only
NTHI1914	68250219	---	predicted ABC-type transport system, periplasmic component	COG3683	COG3683, ABC-type uncharacterized transport system, periplasmic component	General function prediction only
NTHI1915	68250220	---	predicted ABC-type transport system, permease component	COG2215	COG2215, ABC-type uncharacterized transport system, permease component	General function prediction only
NTHI1917	68250221	uvrB	excinuclease ABC subunit B	COG0556	UvrB, Helicase subunit of the DNA excision repair complex	DNA replication, recombination, & repair
NTHI1918	68250222	---	predicted phosphoglycerol transferase-like protein	COG1368	MdoB, Phosphoglycerol transferase and related proteins, alkaline phosphatase superfamily	Cell envelope biogenesis
NTHI1920	68250223	mao2	malic enzyme	COG0281	SfcA, Malic enzyme	Energy production & conversion
NTHI1921	68250224	---	possible polysaccharide biosynthesis protein	COG3955	COG3955, Exopolysaccharide biosynthesis protein	Cell envelope biogenesis
NTHI1922	68250225	rsuA	ribosomal small subunit pseudouridine synthase A	COG1187	RsuA, 16S rRNA uridine-516 pseudouridylate synthase and related pseudouridylate synthases	Translation, ribosomal structure & biogenesis
NTHI1923	68250226	bcr	bicyclomycin/multidrug efflux system	COG2814	AraJ, Arabinose efflux permease	Carbohydrate transport & metabolism
NTHI1924	68250227	---	hypothetical protein	None	None	Function unknown
NTHI1925	68250228	---	predicted membrane protein	COG2860	COG2860, Predicted membrane protein	Function unknown
NTHI1926	68250229	proA	gamma-glutamyl phosphate reductase	COG0014	ProA, Gamma-glutamyl phosphate reductase	Amino acid transport & metabolism
NTHI1928	68250230	dnaJ	chaperone protein DnaJ	COG0484	DnaJ, DnaJ-class molecular chaperone with C-terminal Zn finger domain	Posttranslational modification, protein turnover, chaperones
NTHI1929	68250231	dnaK	chaperone protein DnaK	COG0443	DnaK, Molecular chaperone	Posttranslational modification, protein turnover, chaperones
NTHI1930	68250232	---	hypothetical protein	COG5339	COG5339, Uncharacterized protein conserved in bacteria	Function unknown
NTHI1931	68250233	mgsA	methylglyoxal synthase	COG1803	MgsA, Methylglyoxal synthase	Carbohydrate transport & metabolism
NTHI1933	68250234	aceE	pyruvate dehydrogenase subunit E1	COG2609	AceE, Pyruvate dehydrogenase complex, dehydrogenase (E1) component	Energy production & conversion
NTHI1934	68250235	aceF	dihydrolipoamide acetyltransferase	COG0508	AceF, Pyruvate/2-oxoglutarate dehydrogenase complex, dihydrolipoamide acyltransferase (E2) component, and related enzymes	Energy production & conversion
NTHI1935	68250236	lpdA	dihydrolipoamide dehydrogenase	COG1249	Lpd, Pyruvate/2-oxoglutarate dehydrogenase complex, dihydrolipoamide dehydrogenase (E3) component, and related enzymes	Energy production & conversion
NTHI1936	68250237	---	hypothetical protein	None	None	Function unknown
NTHI1938	68250238	apt	adenine phosphoribosyltransferase	COG0503	Apt, Adenine/guanine phosphoribosyltransferases and related PRPP-binding proteins	Nucleotide transport & metabolism
NTHI1939	68250239	dnaX	DNA polymerase III subunits gamma and tau	COG2812	DnaX, DNA polymerase III, gamma/tau subunits	DNA replication, recombination, & repair
NTHI1940	68250240	upp	uracil phosphoribosyltransferase	COG0035	Upp, Uracil phosphoribosyltransferase	Nucleotide transport & metabolism
NTHI1941	68250241	uraA	probable uracil permease	COG2233	UraA, Xanthine/uracil permeases	Nucleotide transport & metabolism
NTHI1942	68250242	---	DNA replication initiation factor	COG0593	DnaA, ATPase involved in DNA replication initiation	DNA replication, recombination, & repair
NTHI1943	68250243	---	predicted translation initiation factor 1-like proterin	COG0023	SUI1, Translation initiation factor 1 (eIF-1/SUI1) and related proteins	Translation, ribosomal structure & biogenesis
NTHI1944	68250244	pyrF	orotidine 5'-phosphate decarboxylase	COG0284	PyrF, Orotidine-5'-phosphate decarboxylase	Nucleotide transport & metabolism
NTHI1945	68250245	---	hypothetical protein	COG2956	COG2956, Predicted N-acetylglucosaminyl transferase	Carbohydrate transport & metabolism
NTHI1946	68250246	---	predicted membrane protein	COG3771	COG3771, Predicted membrane protein	Function unknown
NTHI1947	68250247	ihfB	integration host factor beta-subunit	COG0776	HimA, Bacterial nucleoid DNA-binding protein	DNA replication, recombination, & repair
NTHI1948	68250248	rpsA	30S ribosomal protein S1	COG0539	RpsA, Ribosomal protein S1	Translation, ribosomal structure & biogenesis
NTHI1949	68250249	cmk	cytidylate kinase	COG0283	Cmk, Cytidylate kinase	Nucleotide transport & metabolism
NTHI1950	68250250	---	pyridoxine biosynthesis protein	COG0214	SNZ1, Pyridoxine biosynthesis enzyme	Coenzyme metabolism
NTHI1951	68250251	---	predicted glutamine amidotransferase	COG0311	PDX2, Predicted glutamine amidotransferase involved in pyridoxine biosynthesis	Coenzyme metabolism
NTHI1952	68250252	dld	D-lactate dehydrogenase	COG0277	GlcD, FAD/FMN-containing dehydrogenases	Energy production & conversion
NTHI1953	68250253	---	hypothetical protein	None	None	Function unknown
NTHI1954	68250254	nlpC	probable lipoprotein NlpC	COG0791	Spr, Cell wall-associated hydrolases (invasion-associated proteins)	Cell envelope biogenesis
NTHI1955	68250255	tldD	TldD	COG0312	TldD, Predicted Zn-dependent proteases and their inactivated homologs	General function prediction only
NTHI1956	68250256	---	predicted methyltransferase	COG0313	COG0313, Predicted methyltransferases	General function prediction only
NTHI1957	68250257	---	putative lipoprotein	COG3107	LppC, Putative lipoprotein	General function prediction only
NTHI1958	68250258	---	hypothetical protein	COG0792	COG0792, Predicted endonuclease distantly related to archaeal Holliday junction resolvase	DNA replication, recombination, & repair
NTHI1959	68250259	---	predicted phosphoheptose isomerase	COG0279	GmhA, Phosphoheptose isomerase	Carbohydrate transport & metabolism
NTHI1960	68250260	---	hypothetical protein	COG2823	OsmY, Predicted periplasmic or secreted lipoprotein	General function prediction only
NTHI1961	68250261	nrdA	ribonucleotide-diphosphate reductase subunit alpha	COG0209	NrdA, Ribonucleotide reductase, alpha subunit	Nucleotide transport & metabolism
NTHI1962	68250262	nrdB	ribonucleotide-diphosphate reductase subunit beta	COG0208	NrdF, Ribonucleotide reductase, beta subunit	Nucleotide transport & metabolism
NTHI1963	68250263	sucB	dihydrolipoamide succinyltransferase component of 2-oxoglutarate dehydrogenase complex	COG0508	AceF, Pyruvate/2-oxoglutarate dehydrogenase complex, dihydrolipoamide acyltransferase (E2) component, and related enzymes	Energy production & conversion
NTHI1964	68250264	kgd	alpha-ketoglutarate decarboxylase	COG0567	SucA, 2-oxoglutarate dehydrogenase complex, dehydrogenase (E1) component, and related enzymes	Energy production & conversion
NTHI1965	68250265	---	predicted Zn-dependent hydrolase-like protein, including glyoxylases	COG0491	GloB, Zn-dependent hydrolases, including glyoxylases	General function prediction only
NTHI1966	68250266	---	conserved putative deoxyribonuclease	COG0084	TatD, Mg-dependent DNase	DNA replication, recombination, & repair
NTHI1967	68250267	---	hypothetical protein	COG3108	COG3108, Uncharacterized protein conserved in bacteria	Function unknown
NTHI1968	68250268	---	hypothetical protein	COG2989	COG2989, Uncharacterized protein conserved in bacteria	Function unknown
NTHI1969	68250269	prc	carboxy-terminal protease	COG0793	Prc, Periplasmic protease	Cell envelope biogenesis
NTHI1970	68250270	proQ	putative solute/DNA competence effector	COG3109	ProQ, Activator of osmoprotectant transporter ProP	Signal transduction
NTHI1972	68250271	---	paraquat-inducible protein A-like protein	COG2995	PqiA, Uncharacterized paraquat-inducible protein A	Function unknown
NTHI1973	68250272	---	paraquat-inducible protein B-like protein	COG3008	PqiB, Paraquat-inducible protein B	General function prediction only
NTHI1974	68250273	moaE	molybdopterin converting factor subunit 2	COG0314	MoaE, Molybdopterin converting factor, large subunit	Coenzyme metabolism
NTHI1976	68250274	moaD	molybdopterin synthase small subunit	COG1977	MoaD, Molybdopterin converting factor, small subunit	Coenzyme metabolism
NTHI1977	68250275	moaC	molybdenum cofactor biosynthesis protein C	COG0315	MoaC, Molybdenum cofactor biosynthesis enzyme	Coenzyme metabolism
NTHI1978	68250276	moaA	molybdenum cofactor biosynthesis protein A	COG2896	MoaA, Molybdenum cofactor biosynthesis enzyme	Coenzyme metabolism
NTHI1979	68250277	---	predicted regulator of cell morphogenesis and NO signaling	COG2846	COG2846, Regulator of cell morphogenesis and NO signaling	Cell division & chromosome partitioning
NTHI1980	68250278	---	predicted regulator of cell morphogenesis and NO signaling	COG2846	COG2846, Regulator of cell morphogenesis and NO signaling	Cell division & chromosome partitioning
NTHI1981	68250279	---	probable phosphosugar isomerase	COG0794	GutQ, Predicted sugar phosphate isomerase involved in capsule formation	Cell envelope biogenesis
NTHI1982	68250280	yrbI	3-deoxy-D-manno-octulosonate 8-phosphate phosphatase	COG1778	COG1778, Low specificity phosphatase (HAD superfamily)	General function prediction only
NTHI1983	68250281	hmw1A	HMW1A, high molecular weight adhesin 1	COG2911	COG2911, Uncharacterized protein conserved in bacteria	Function unknown
NTHI1984	68250282	hmw1B	HMW1B, OMP-85-like protein required for secretion of HMW1A and HMW2A	COG2831	FhaC, Hemolysin activation/secretion protein	Intracellular trafficking & secretion
NTHI1985	68250283	hmw1C	HMW1C, putative glycosyltransferase involved in glycosylation of HMW1A and HMW2A	COG3914	Spy, Predicted O-linked N-acetylglucosamine transferase, SPINDLY family	Posttranslational modification, protein turnover, chaperones
NTHI1986	68250284	---	predicted membrane protein	COG1289	COG1289, Predicted membrane protein	Function unknown
NTHI1987	68250285	---	hypothetical protein	COG3110	COG3110, Uncharacterized protein conserved in bacteria	Function unknown
NTHI1988	68250286	sohB	predicted inner membrane peptidase	COG0616	SppA, Periplasmic serine proteases (ClpP class)	Posttranslational modification, protein turnover, chaperones; Intracellular trafficking & secretion
NTHI1989	68250287	rnfA	Na(+)-translocating NADH-quinone reductase subunit E	COG4657	RnfA, Predicted NADH:ubiquinone oxidoreductase, subunit RnfA	Energy production & conversion
NTHI1990	68250288	rnfB	electron transport complex protein RnfB	COG2878	COG2878, Predicted NADH:ubiquinone oxidoreductase, subunit RnfB	Energy production & conversion
NTHI1992	68250289	rnfC	electron transport complex protein RnfC	COG4656	RnfC, Predicted NADH:ubiquinone oxidoreductase, subunit RnfC	Energy production & conversion
NTHI1993	68250290	rnfD	electron transport complex protein RnfD	COG4658	RnfD, Predicted NADH:ubiquinone oxidoreductase, subunit RnfD	Energy production & conversion
NTHI1994	68250291	rnfG	electron transport complex protein RnfG	COG4659	RnfG, Predicted NADH:ubiquinone oxidoreductase, subunit RnfG	Energy production & conversion
NTHI1995	68250292	---	SoxR-reducing system protein RsxE	COG4660	RnfE, Predicted NADH:ubiquinone oxidoreductase, subunit RnfE	Energy production & conversion
NTHI1996	68250293	nth	endonuclease III	COG0177	Nth, Predicted EndoIII-related endonuclease	DNA replication, recombination, & repair
NTHI1997	68250294	---	predicted Na+-dependent transporters of the SNF family	COG0733	COG0733, Na+-dependent transporters of the SNF family	General function prediction only
NTHI1998	68250295	modC	molybdate transporter ATP-binding protein	COG4148	ModC, ABC-type molybdate transport system, ATPase component	Inorganic ion transport & metabolism
NTHI1999	68250296	modB	molybdate ABC transporter permease protein	COG4149	ModC, ABC-type molybdate transport system, permease component	Inorganic ion transport & metabolism
NTHI2000	68250297	modA	molybdate-binding periplasmic protein	COG0725	ModA, ABC-type molybdate transport system, periplasmic component	Inorganic ion transport & metabolism
NTHI2001	68250298	modE	transcriptional regulator ModE	COG2005	ModE, N-terminal domain of molybdenum-binding protein	General function prediction only
NTHI2002	68250299	lsgF	putative UDP-galactose--lipooligosaccharide galactosyltransferase	COG0463	WcaA, Glycosyltransferases involved in cell wall biogenesis	Cell envelope biogenesis
NTHI2003	68250300	lsgE	putative UDP-galactose--lipooligosaccharide galactosyltransferase	COG1216	COG1216, Predicted glycosyltransferases	General function prediction only
NTHI2004	68250301	lsgD	putative UDP-glcNAc--lipooligosaccharide N-acetylglucosaminyl glycosyltransferase	COG3306	COG3306, Glycosyltransferase involved in LPS biosynthesis	Cell envelope biogenesis
NTHI2005	68250302	lsgC	putative UDP-galactose--lipooligosaccharide galactosyltransferase	COG0438	RfaG, Glycosyltransferase	Cell envelope biogenesis
NTHI2006	68250303	lsgB	CMP-N-acetylneuraminate-beta-galactosamide-alpha-2,3-sialyltransferase	None	None	Function unknown
NTHI2007	68250304	lsgA	putative lipooligosaccharide flippase	COG2244	RfbX, Membrane protein involved in the export of O-antigen and teichoic acid	General function prediction only
NTHI2008	68250305	---	hypothetical protein	COG1434	COG1434, Uncharacterized conserved protein	Function unknown
NTHI2011	68250306	---	predicted permease	COG0795	COG0795, Predicted permeases	General function prediction only
NTHI2012	68250307	---	predicted permease	COG0795	COG0795, Predicted permeases	General function prediction only
NTHI2013	68250308	pepA	leucyl aminopeptidase	COG0260	PepB, Leucyl aminopeptidase	Amino acid transport & metabolism
NTHI2014	68250309	---	predicted choline-glycine betaine transporter	COG1292	BetT, Choline-glycine betaine transporter	Cell envelope biogenesis
NTHI2015	68250310	qseC	sensor protein QseC	COG0642	BaeS, Signal transduction histidine kinase	Signal transduction
NTHI2016	68250311	qseB	transcriptional regulatory protein QseB	COG0745	OmpR, Response regulators consisting of a CheY-like receiver domain and a winged-helix DNA-binding domain	Translation, ribosomal structure & biogenesis
NTHI2017	68250312	---	hypothetical protein	COG3111	COG3111, Uncharacterized conserved protein	Function unknown
NTHI2020	68250313	crr	glucose-specific PTS system component	COG2190	NagE, Phosphotransferase system IIA components	Carbohydrate transport & metabolism
NTHI2021	68250314	ptsI	phosphoenolpyruvate-protein phosphotransferase	COG1080	PtsA, Phosphoenolpyruvate-protein kinase (PTS system EI component in bacteria)	Carbohydrate transport & metabolism
NTHI2022	68250315	ptsH	phosphocarrier protein HPr	COG1925	FruB, Phosphotransferase system, HPr-related proteins	Carbohydrate transport & metabolism
NTHI2023	68250316	engC	ribosome-associated GTPase	COG1162	COG1162, Predicted GTPases	General function prediction only
NTHI2024	68250317	orn	oligoribonuclease	COG1949	Orn, Oligoribonuclease (3'->5' exoribonuclease)	RNA processing & modification
NTHI2025	68250318	wecA	undecaprenyl-phosphate alpha-N-acetylglucosaminyl 1-phosphate transferase	COG0472	Rfe, UDP-N-acetylmuramyl pentapeptide phosphotransferase/UDP-N- acetylglucosamine-1-phosphate transferase	Cell envelope biogenesis
NTHI2026	68250319	glnD	PII uridylyl-transferase	COG2844	GlnD, UTP:GlnB (protein PII) uridylyltransferase	Posttranslational modification, protein turnover, chaperones
NTHI2027	68250320	map	methionine aminopeptidase	COG0024	Map, Methionine aminopeptidase	Translation, ribosomal structure & biogenesis
NTHI2029	68250321	---	hypothetical protein	COG0316	IscA, Uncharacterized conserved protein	Function unknown
NTHI2030	68250322	---	hypothetical protein	COG3112	COG3112, Uncharacterized protein conserved in bacteria	Function unknown
NTHI2031	68250323	mrcB	penicillin-binding protein 1B	COG0744	MrcB, Membrane carboxypeptidase (penicillin-binding protein)	Cell envelope biogenesis
NTHI2033	68250324	hemH	phosphoribosylaminoimidazole-succinocarboxamide synthase	COG0152	PurC, Phosphoribosylaminoimidazolesuccinocarboxamide (SAICAR) synthase	Nucleotide transport & metabolism
NTHI2034	68250325	argG	argininosuccinate synthase	COG0137	ArgG, Argininosuccinate synthase	Amino acid transport & metabolism
NTHI2035	68250326	---	Mn2+ and Fe2+ transporter of the NRAMP family	COG1914	MntH, Mn2+ and Fe2+ transporters of the NRAMP family	Inorganic ion transport & metabolism
NTHI2036	68250327	---	hypothetical protein	COG1540	COG1540, Uncharacterized proteins, homologs of lactam utilization protein B	General function prediction only
NTHI2037	68250328	---	predicted allophanate hydrolase subunit 2	COG1984	DUR1, Allophanate hydrolase subunit 2	Amino acid transport & metabolism
NTHI2038	68250329	---	predicted allophanate hydrolase subunit 1	COG2049	DUR1, Allophanate hydrolase subunit 1	Amino acid transport & metabolism
NTHI2041	68250330	rnb	exoribonuclease II	COG4776	Rnb, Exoribonuclease II	Transcription
NTHI2042	68250331	fabI	enoyl-[acyl-carrier-protein] reductase	COG0623	FabI, Enoyl-	Secondary metabolite biosynthesis, transport, & catabolism
NTHI2044	68250332	prfC	peptide chain release factor 3	COG4108	PrfC, Peptide chain release factor RF-3	Translation, ribosomal structure & biogenesis
NTHI2045	68250333	---	hypothetical protein	None	None	Function unknown
NTHI2046	68250334	---	predicted branched-chain amino acid permease	COG1687	AzlD, Predicted branched-chain amino acid permeases (azaleucine resistance)	Amino acid transport & metabolism
NTHI2047	68250335	---	predicted branched-chain amino acid permease	COG1296	AzlC, Predicted branched-chain amino acid permease (azaleucine resistance)	Amino acid transport & metabolism
NTHI2048	68250336	metR	HTH-type transcriptional regulator MetR	COG0583	LysR, Transcriptional regulator	Transcription
NTHI2049	68250337	lldD	L-lactate dehydrogenase	COG1304	LldD, L-lactate dehydrogenase (FMN-dependent) and related alpha-hydroxy acid dehydrogenases	Energy production & conversion
NTHI2050	68250338	murI	glutamate racemase	COG0796	MurI, Glutamate racemase	Cell envelope biogenesis
NTHI2051	68250339	recG	ATP-dependent DNA helicase	COG1200	RecG, RecG-like helicase	Translation, ribosomal structure & biogenesis
NTHI2052	68250340	spoT	guanosine-3',5'-bis 3'-pyrophosphohydrolase	COG0317	SpoT, Guanosine polyphosphate pyrophosphohydrolases/synthetases	Translation, ribosomal structure & biogenesis
NTHI2053	68250341	rpoZ	DNA-directed RNA polymerase subunit omega	COG1758	RpoZ, DNA-directed RNA polymerase, subunit K/omega	Transcription
NTHI2054	68250342	gmk	guanylate kinase	COG0194	Gmk, Guanylate kinase	Nucleotide transport & metabolism
NTHI2055	163000000	---	beta-lactamase TEM precursor	COG2367	PenP, Beta-lactamase class A	Defense mechanisms
